# Supplementary material for: Structure–activity relationship studies on an antitumor marine macrolide using aplyronine a–swinholide A hybrid
Source: Royal Society of Chemistry journal article supplement (doi:10.1039/d2ob00118g), 2022-01-01

## *Supplementary Information*

### **Structure–Activity Relationship Studies on an Antitumor Marine Macrolide Using Aplyronine A–Swinholide A Hybrid**

Takayuki Ohyoshi,\*<sup>1</sup> Atsuhiko Takano,<sup>1</sup> Imari Kikuchi,<sup>1</sup> Tomotaka Ogura,<sup>1</sup> Mayu Namiki,<sup>1</sup> Yuto Miyazaki,<sup>1</sup> Takahiro Hirano,<sup>1</sup> Shota Konishi,<sup>1</sup> Yuta Ebihara,<sup>1</sup> Koichi Takeno,<sup>1</sup> Ichiro Hayakawa,<sup>2</sup> Hideo Kigoshi\*<sup>1</sup>

<sup>1</sup>Department of Chemistry, Faculty of Pure and Applied Sciences, University of Tsukuba, 1-1-1 Tennodai, Tsukuba, Ibaraki 305-8571, Japan

<sup>2</sup>Graduate School of Integrated Basic Sciences, Nihon University, 3-25-40 Sakurajosui Setagaya-Ku, Tokyo 156-8550, Japan

## Table of Contents

1. Stereochemistry at C25 and C26 in compound **13** (S3)
2. Stereochemistry at C19 in compound **26** (S4)
3. SDS-PAGE of the supernatants and the precipitates (S5-S6)
4.  $^1\text{H}$  and  $^{13}\text{C}$  NMR spectra of synthetic compounds (S7–S70)

## Determination of the absolute configurations at C25 and C26 in **13**

The stereochemistry of **13** was determined as follows (Scheme S1). Acetylene **13** was converted into 1,3-acetonide **S1**. The relative stereochemistry of C23 and C25 in **S1** was determined to be anti by the  $^{13}\text{C}$  chemical shifts of two acetonide methyl groups ( $\delta_{\text{C}}$  23.6, 25.0).<sup>1</sup> In addition, acetylene **13** was converted into 1,3-acetonide **S3**, and the relative stereochemistry of C25 and C26 was determined to be anti by  $^1\text{H}$ - $^1\text{H}$  coupling constants.

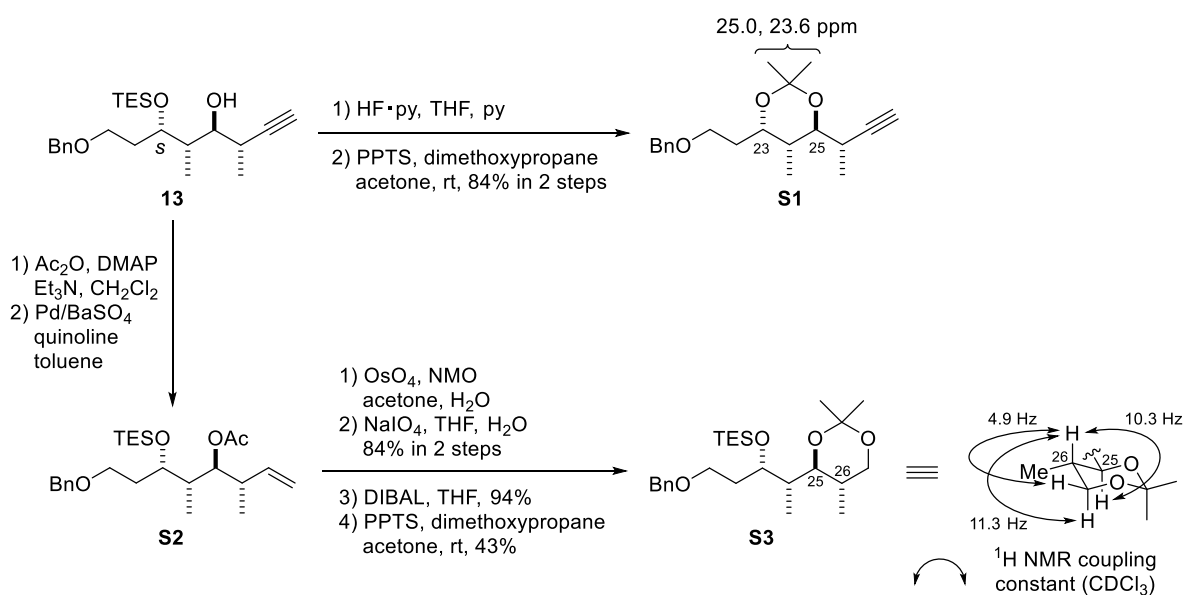

**Scheme S1.** Determination of the absolute configurations at C25 and C26 in **13**

## Reference

- 1) Rychnovsky, S. D.; Rogers, B.; Yang, G. *J. Org. Chem.* **1993**, *58*, 3511.

## Determination of the absolute configuration at C19 of **S26**

### (*S*)-MTPA ester of **26**

To a stirred solution of alcohol **26** (2.5 mg, 2.5  $\mu\text{mol}$ ) in  $\text{CH}_2\text{Cl}_2$  (1.0 mL) were added (*R*)-(+)-MTPACl (9.4  $\mu\text{L}$ , 50  $\mu\text{mol}$ ) and DMAP (9.1 mg, 75  $\mu\text{mol}$ ). The reaction mixture was stirred at room temperature for 2 h, poured into saturated aqueous  $\text{NaHCO}_3$  (2.0 mL), and extracted with  $\text{CH}_2\text{Cl}_2$  (3.0 mL  $\times$  3). The combined extracts were washed with brine (5 mL), dried over  $\text{Na}_2\text{SO}_4$ , and concentrated. The crude product was purified by preparative TLC (hexane–EtOAc 9 : 1) to afford (*S*)-MTPA ester of **26** (2.6 mg, 87%) as a colorless oil.

### (*R*)-MTPA ester of **26**

A solution of alcohol **26** (2.9 mg, 2.9  $\mu\text{mol}$ ) in  $\text{CH}_2\text{Cl}_2$  (1.0 mL) was similarly treated with (*S*)-(–)-MTPACl and DMAP to afford (*R*)-MTPA ester of **26** (2.8 mg, 80%) as a colorless oil.

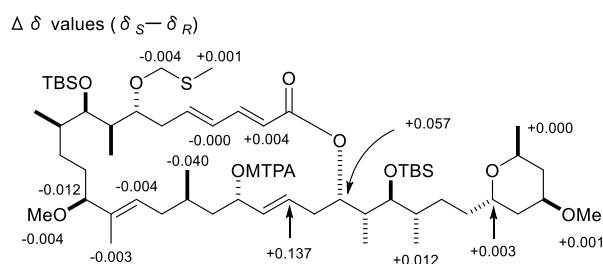

**Figure S1.** The  $\Delta \delta$  values ( $\delta_S - \delta_R$ ) for MTPA esters of **26**

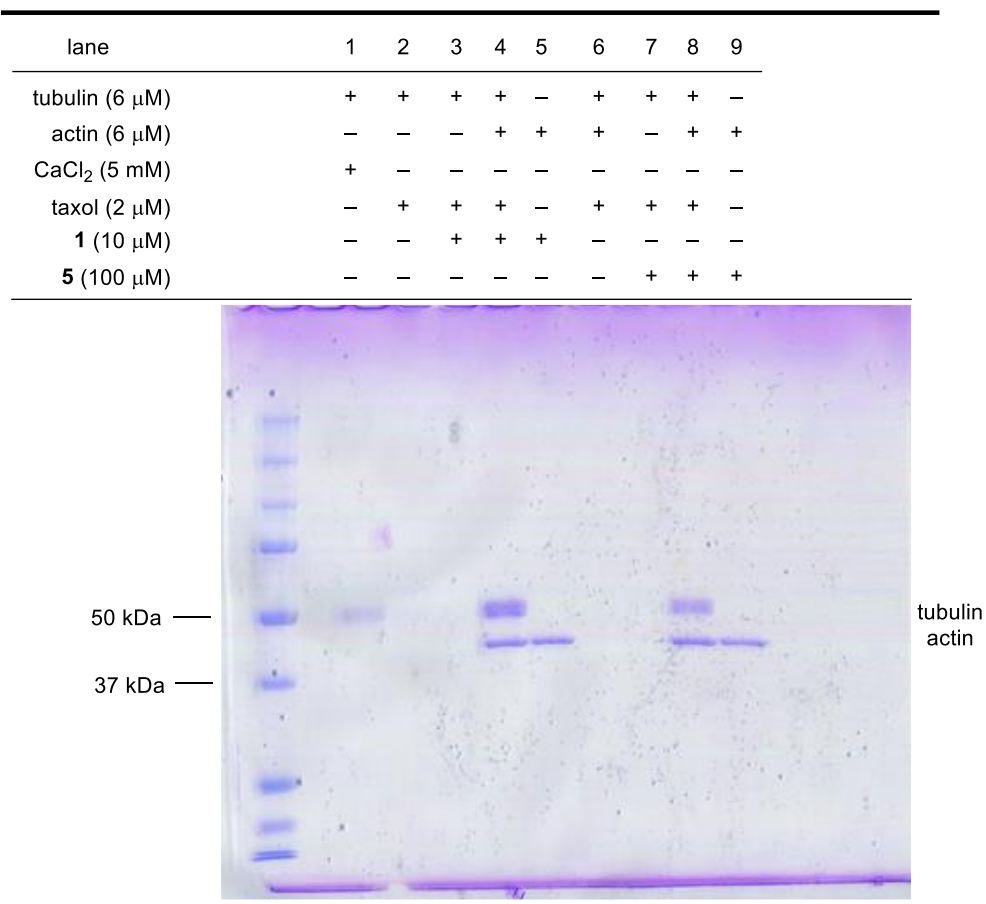

**Figure S2.** SDS-PAGE of the supernatants

Tubulin was polymerized with taxol in the presence of actin and/or **1** or **5**, and then precipitated by ultracentrifugation. Depolymerized proteins in the supernatant were analyzed by SDS-PAGE, and detected with CBB stain.

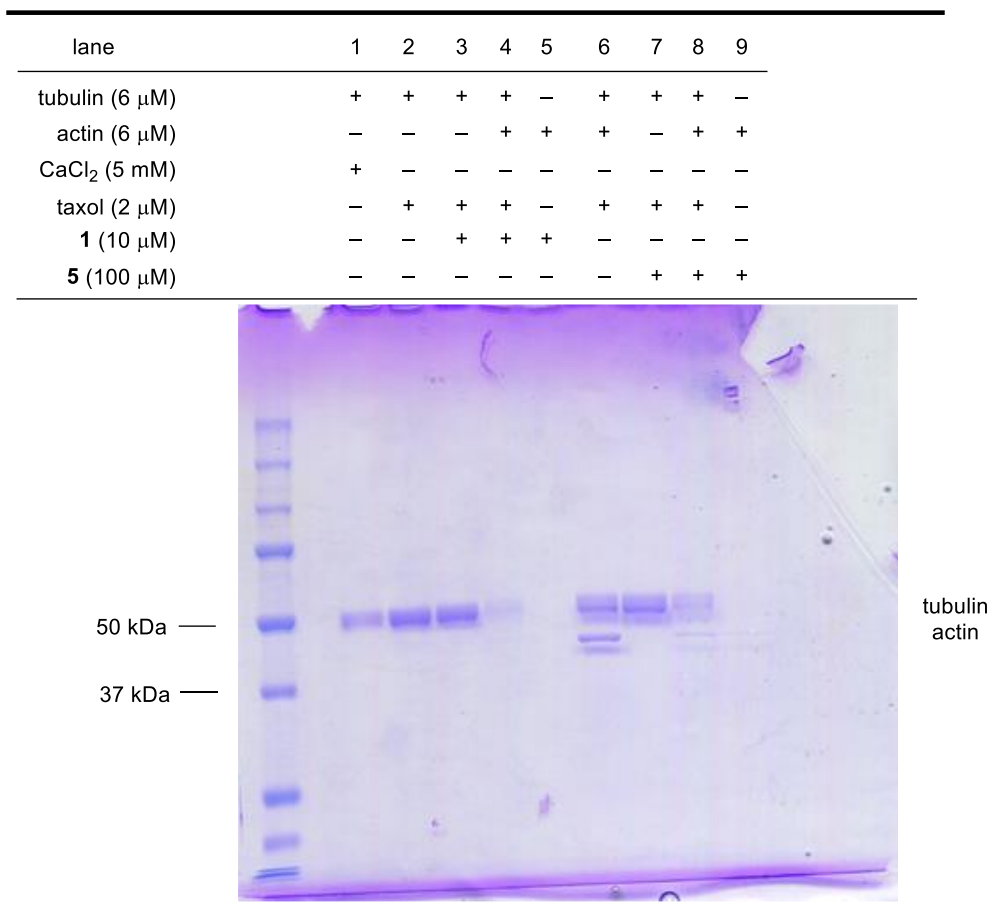

**Figure S3.** SDS-PAGE of the precipitates

Tubulin was polymerized with taxol in the presence of actin and/or **1** or **5**, and then precipitated by ultracentrifugation. Polymerized proteins in the precipitate were analyzed by SDS-PAGE, and detected with CBB stain.

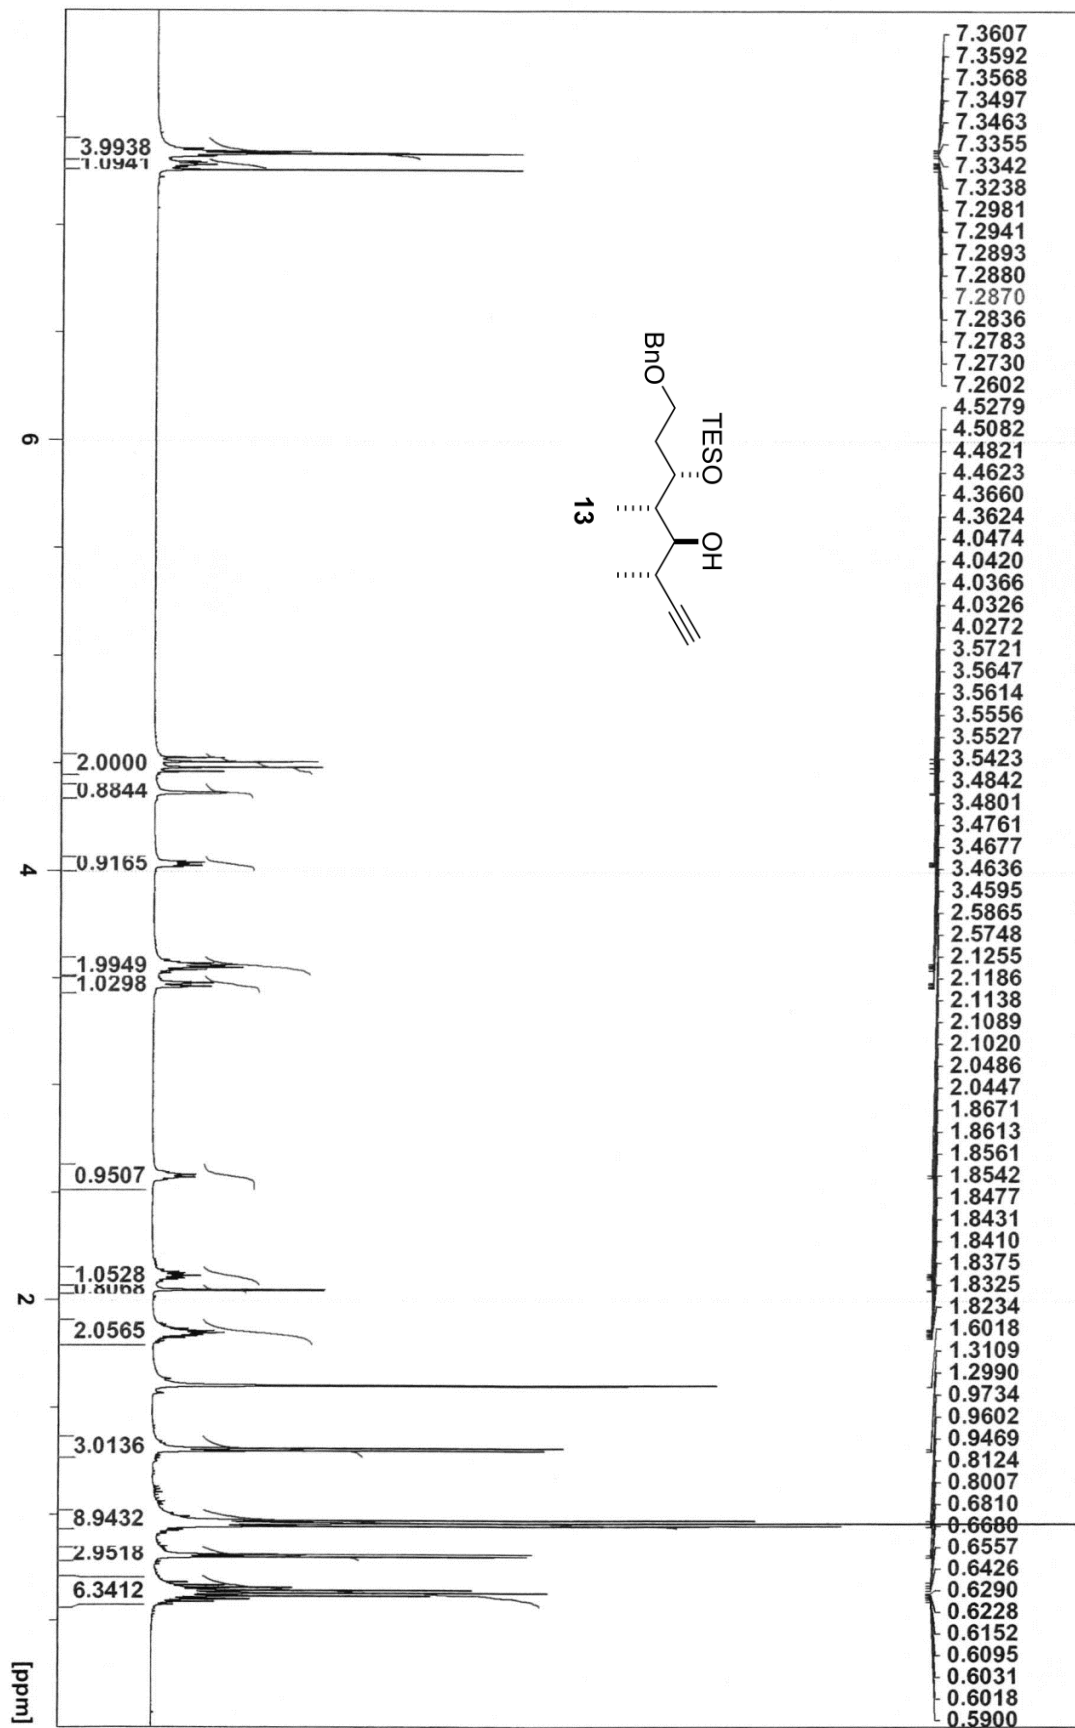

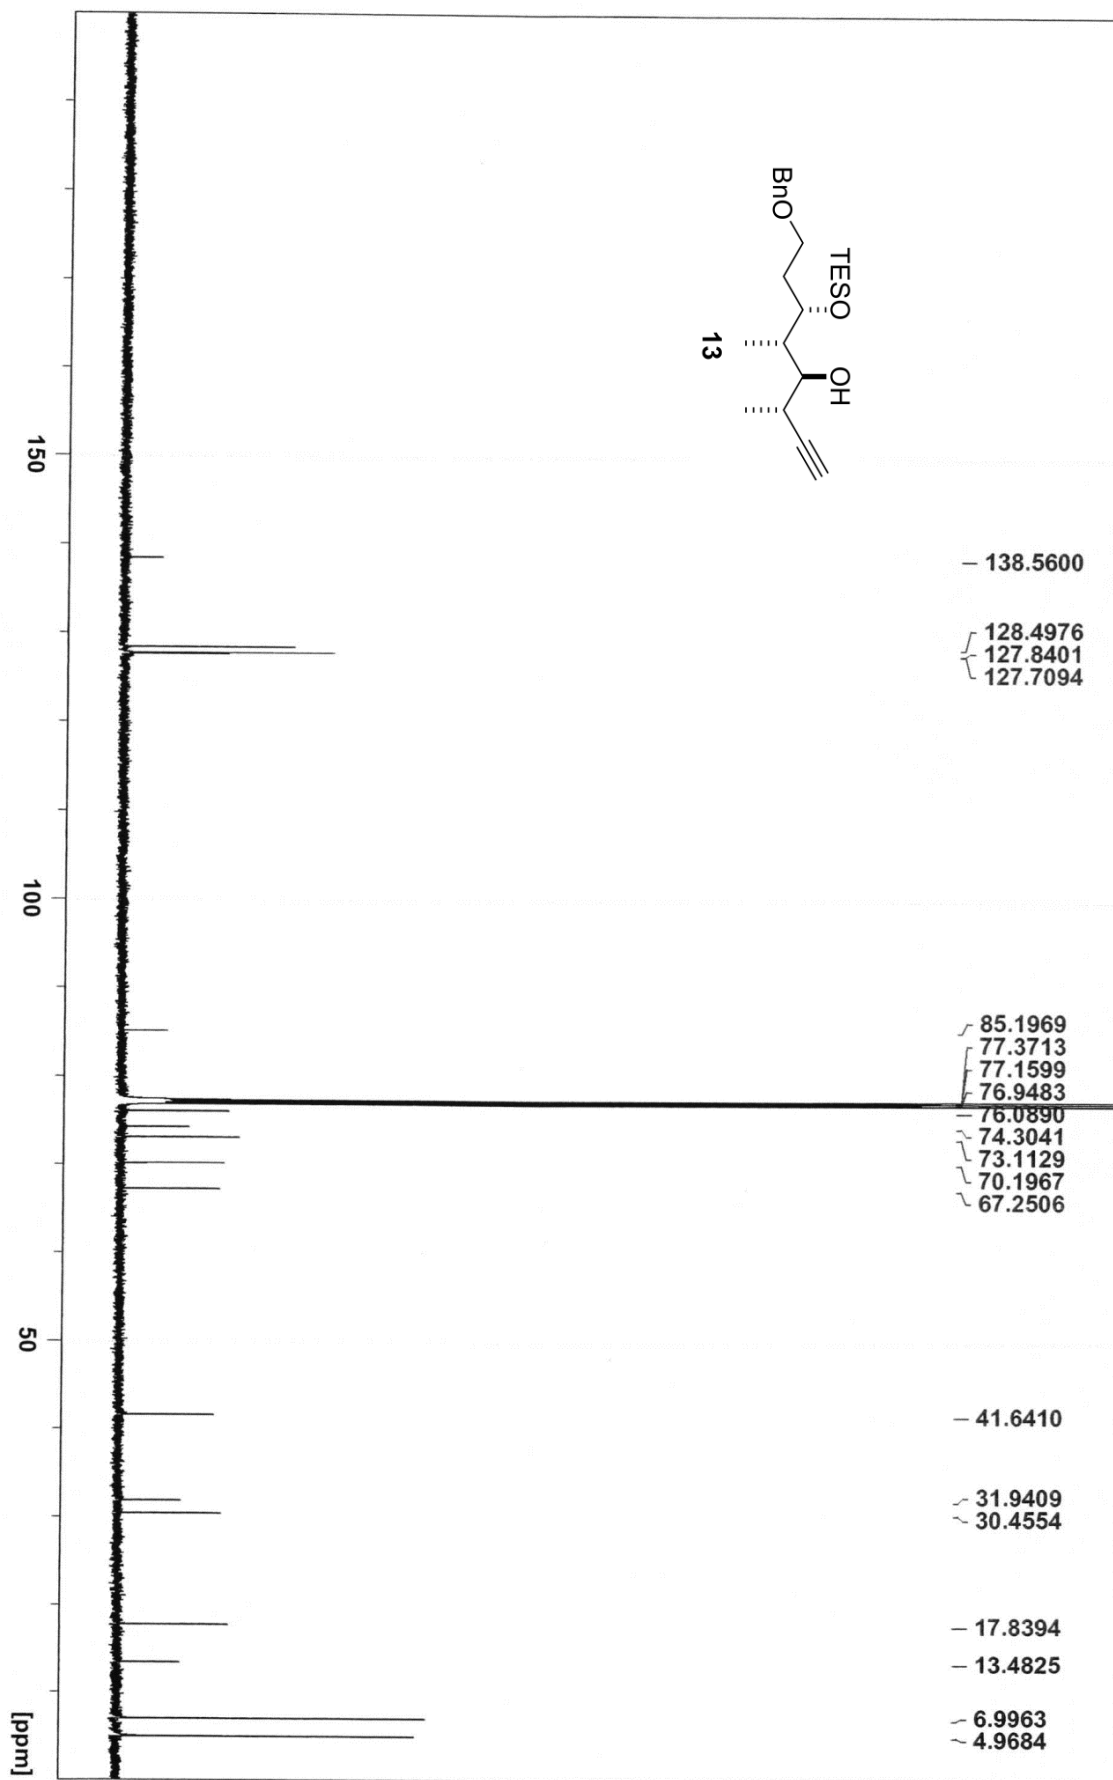



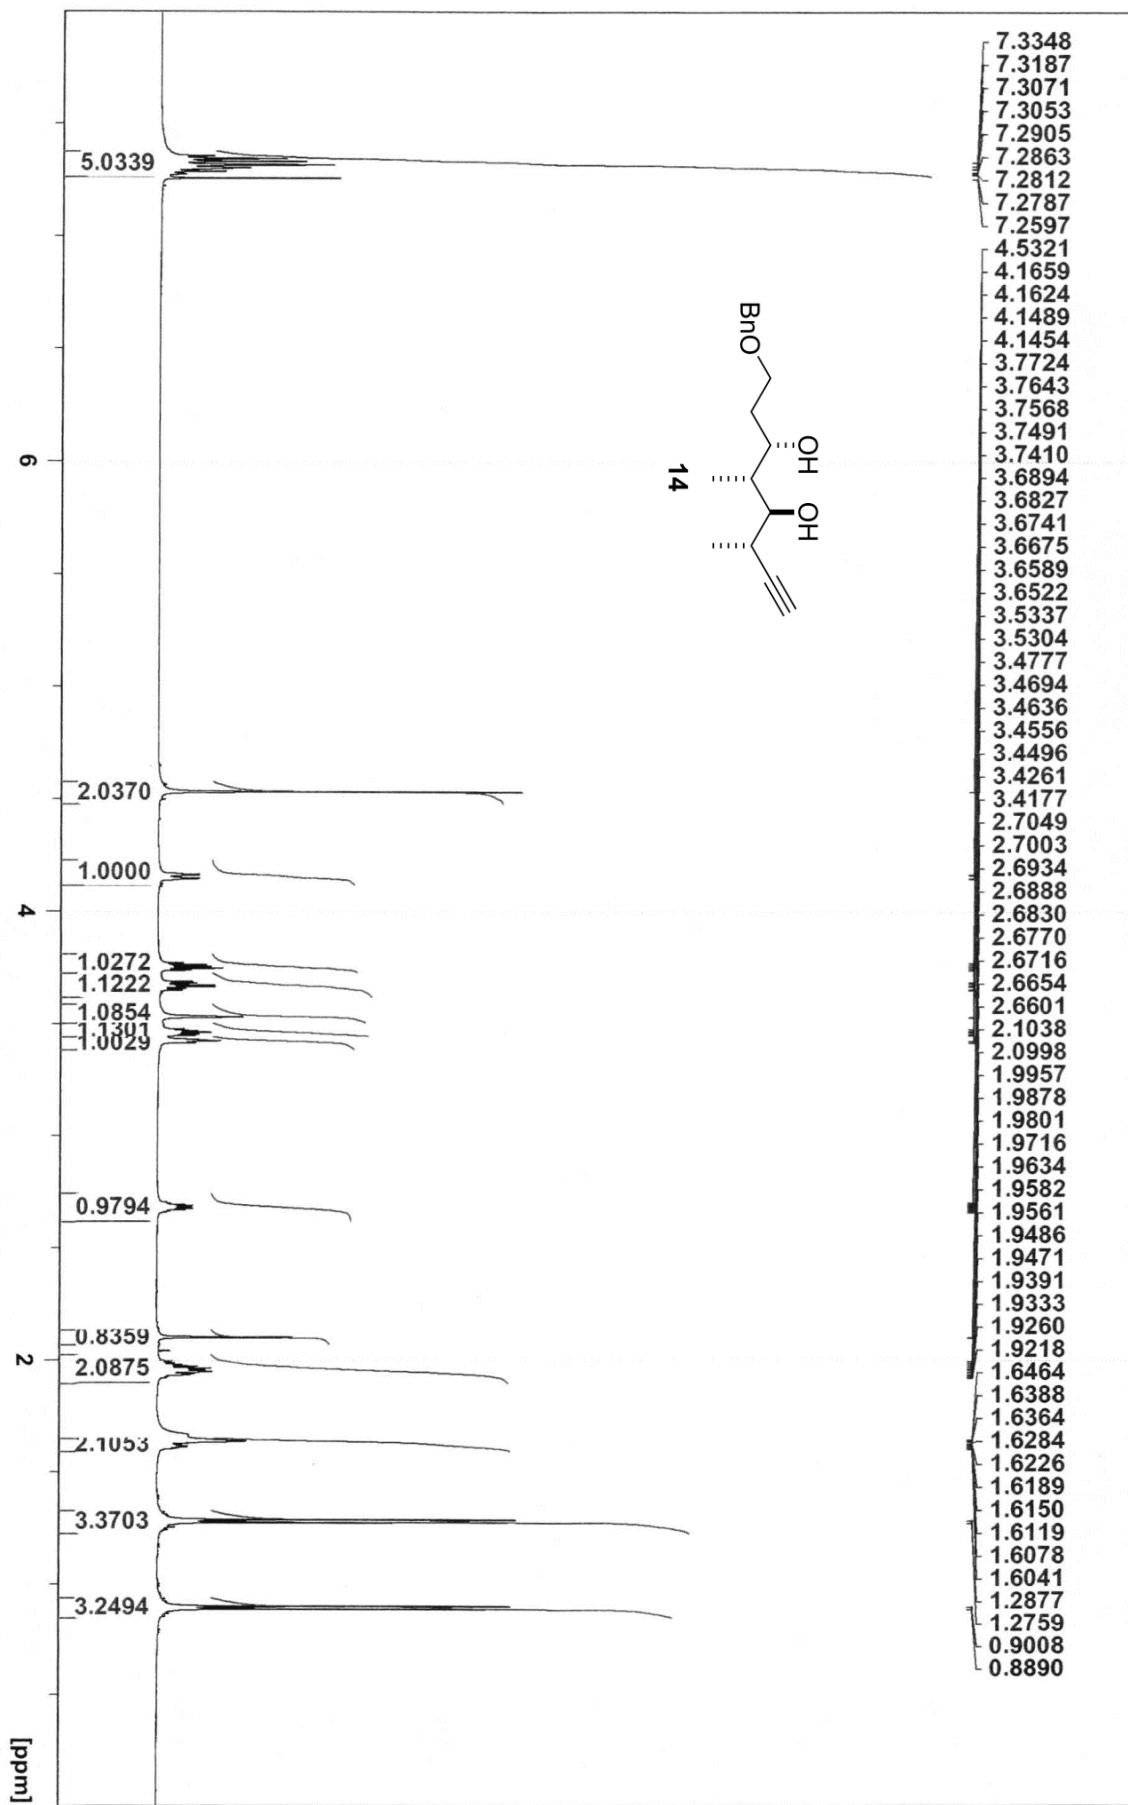

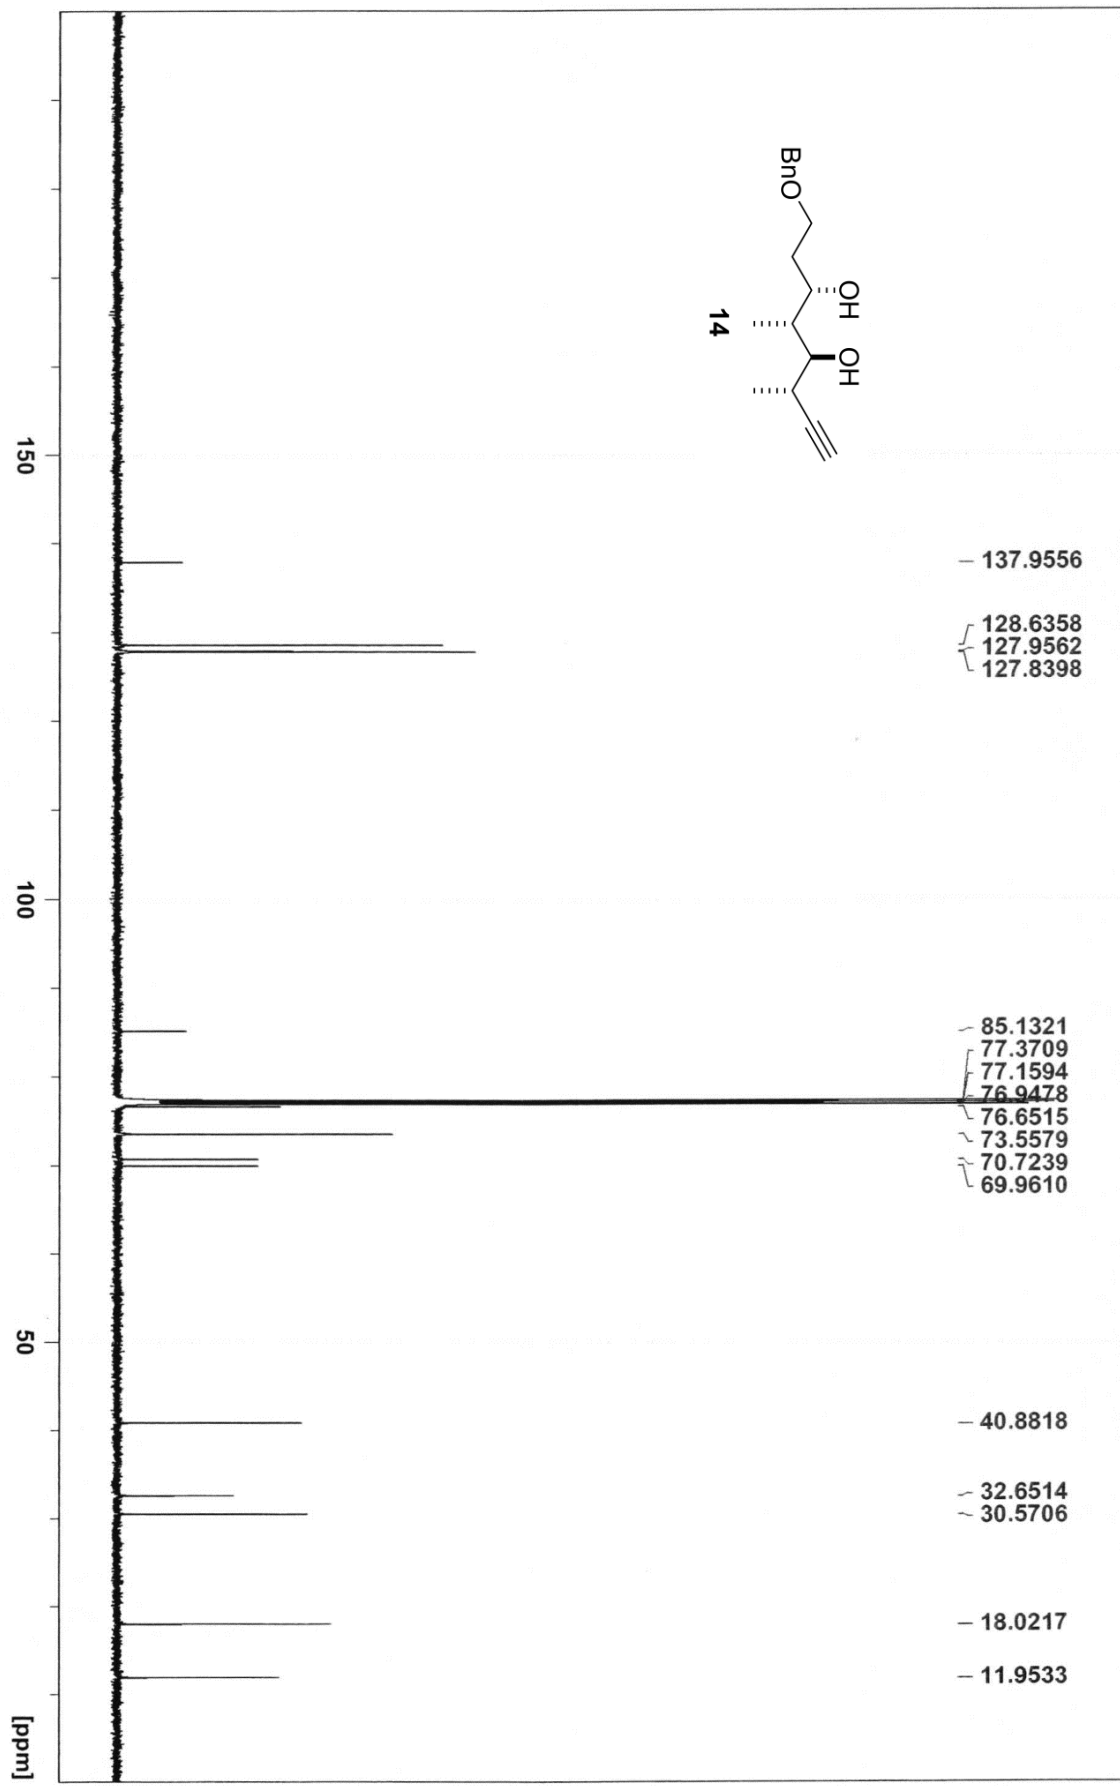

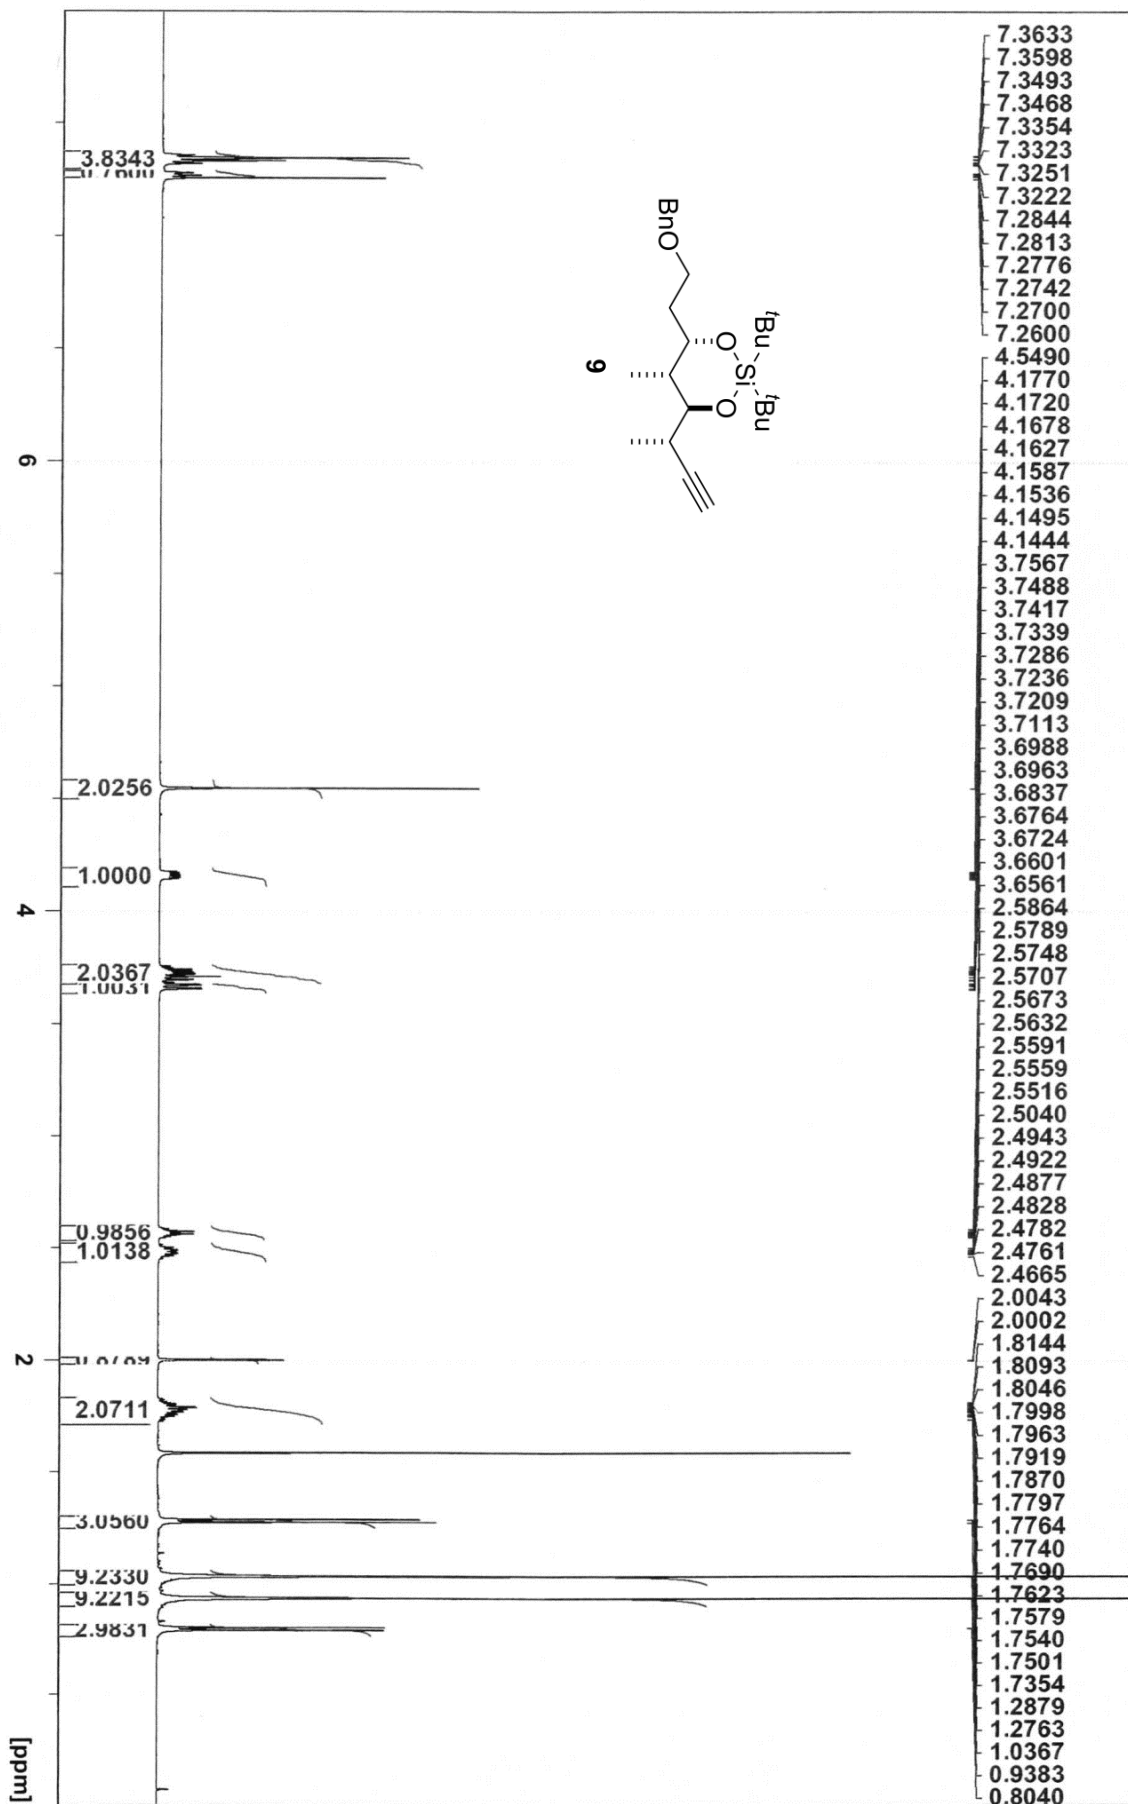

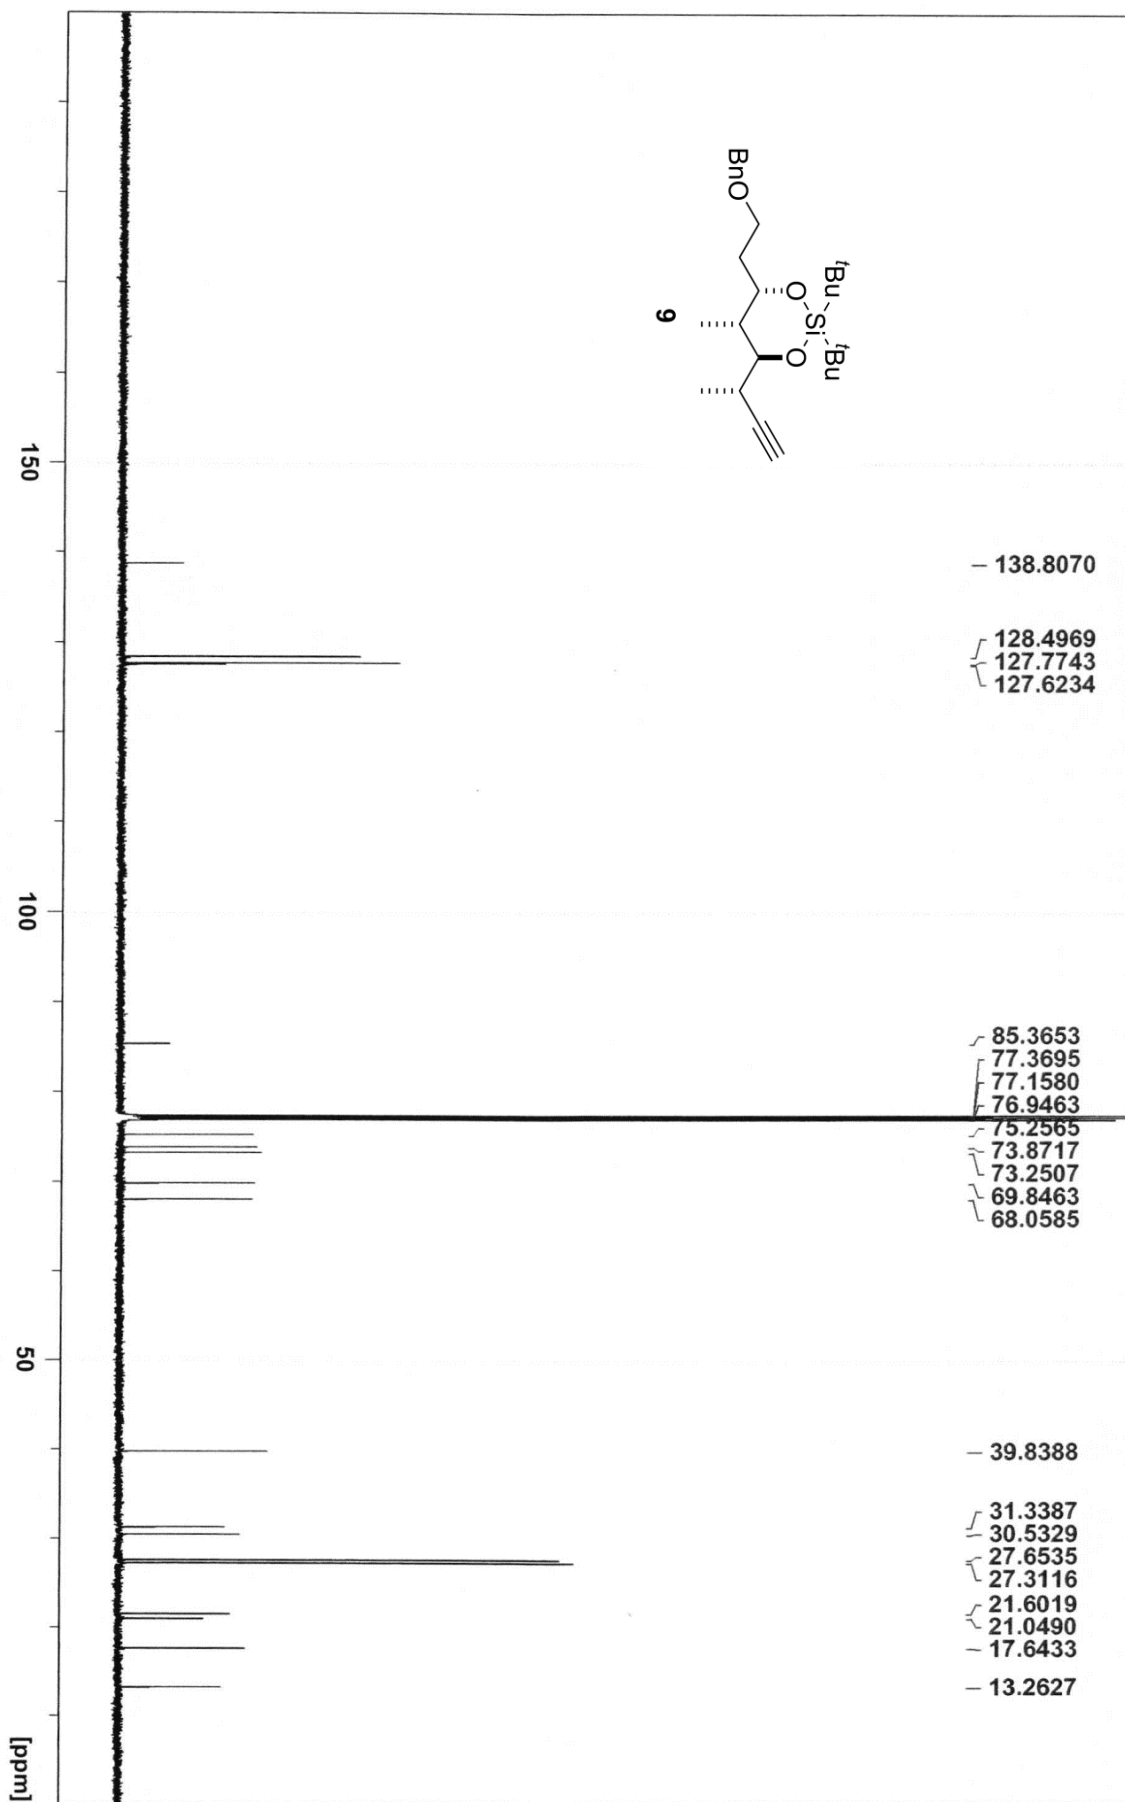

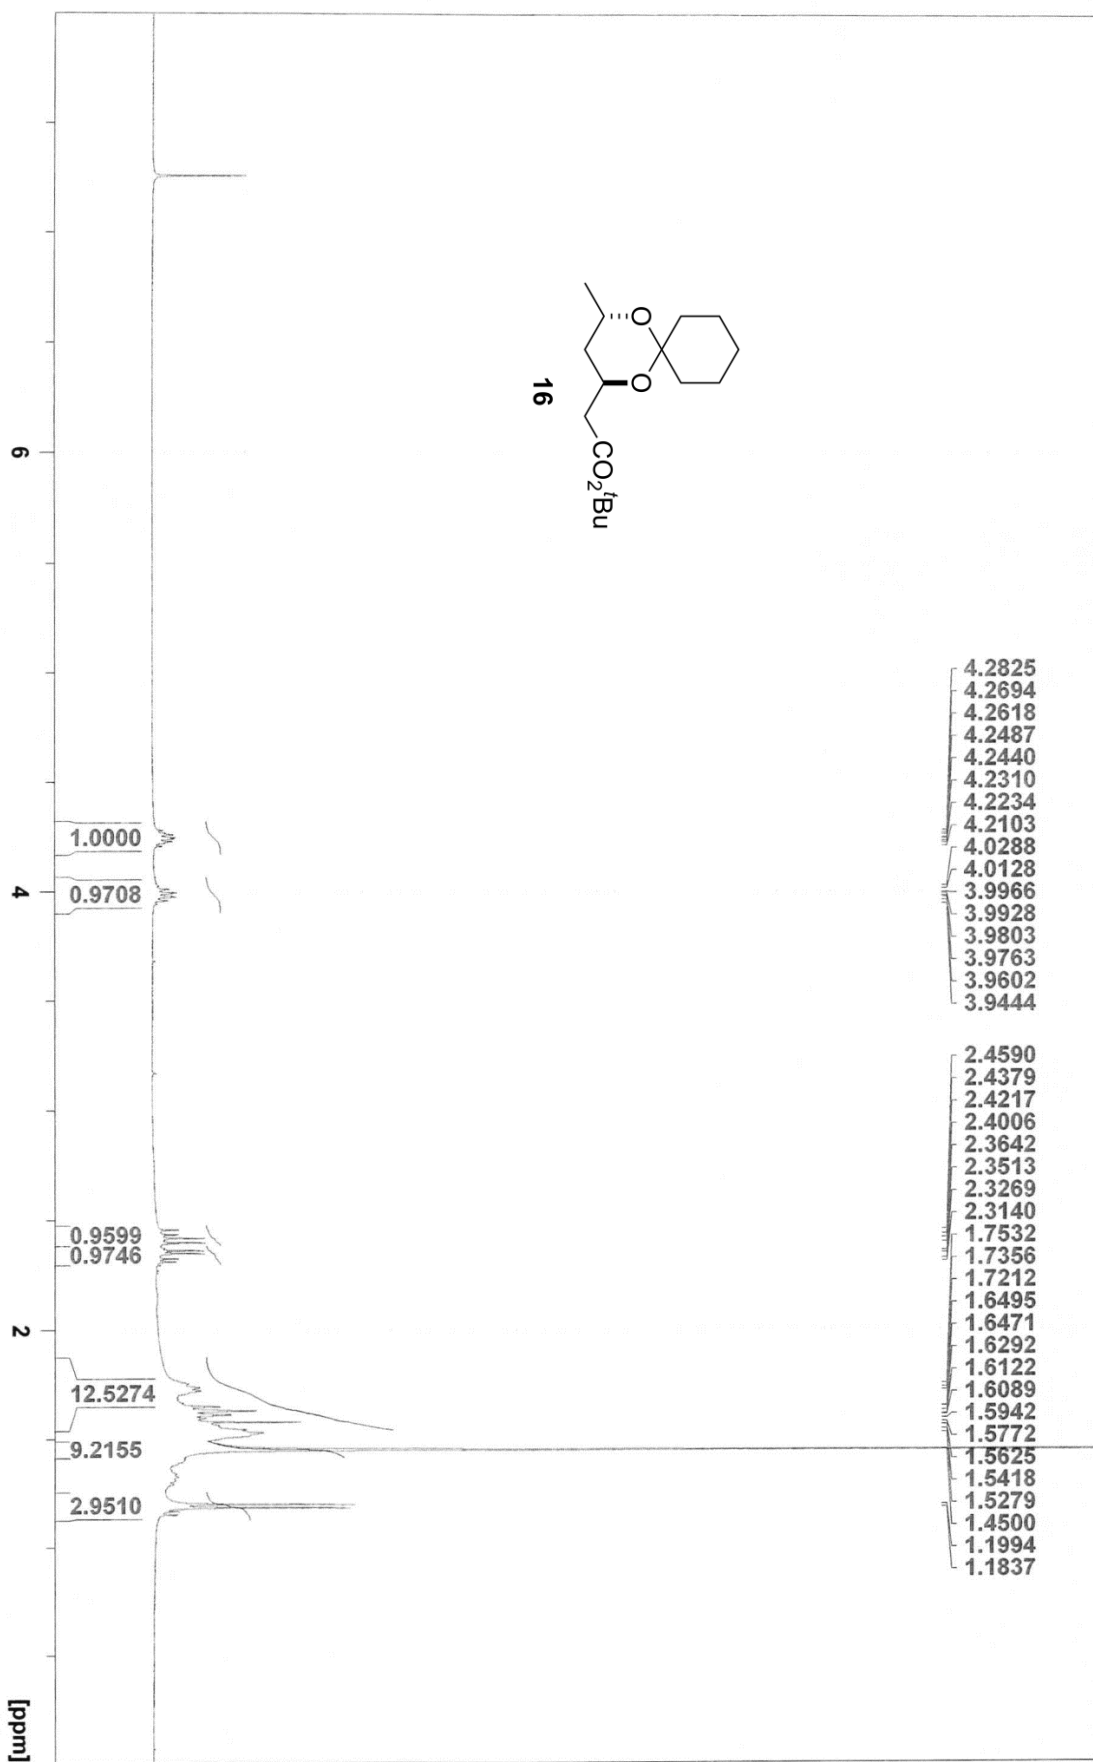

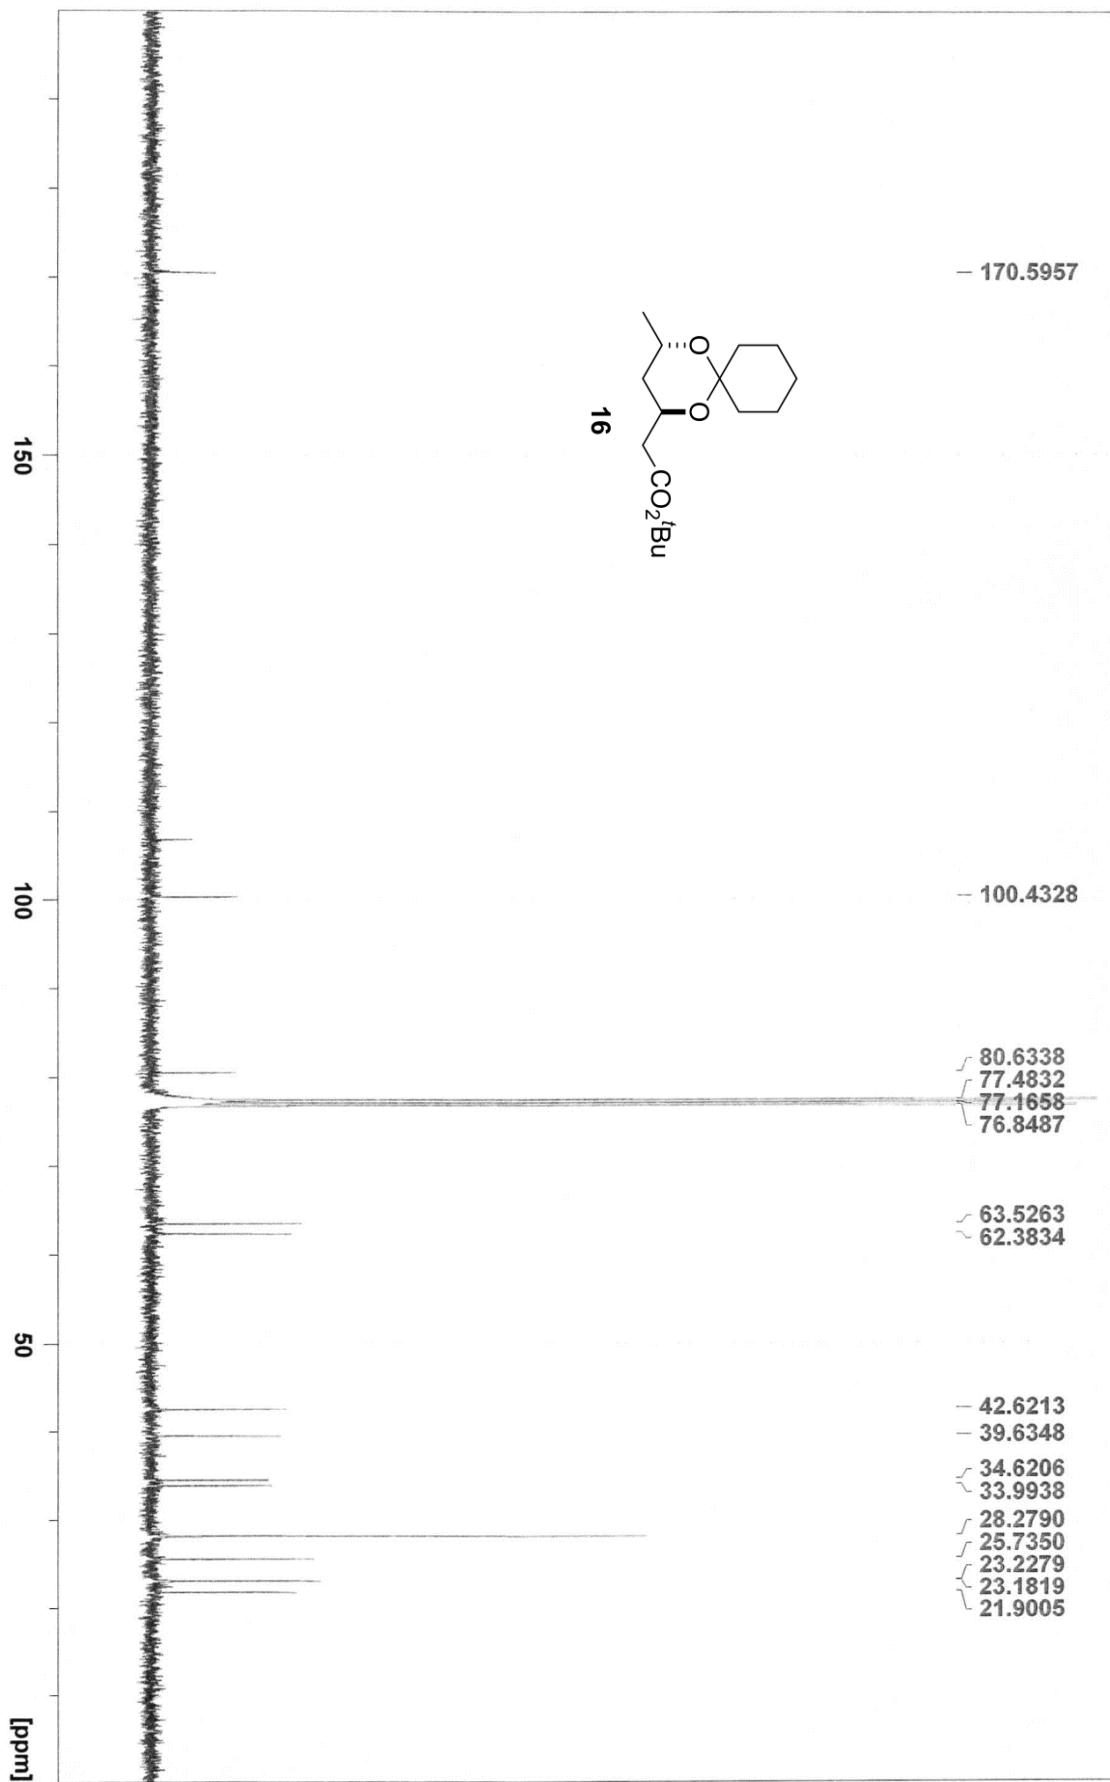

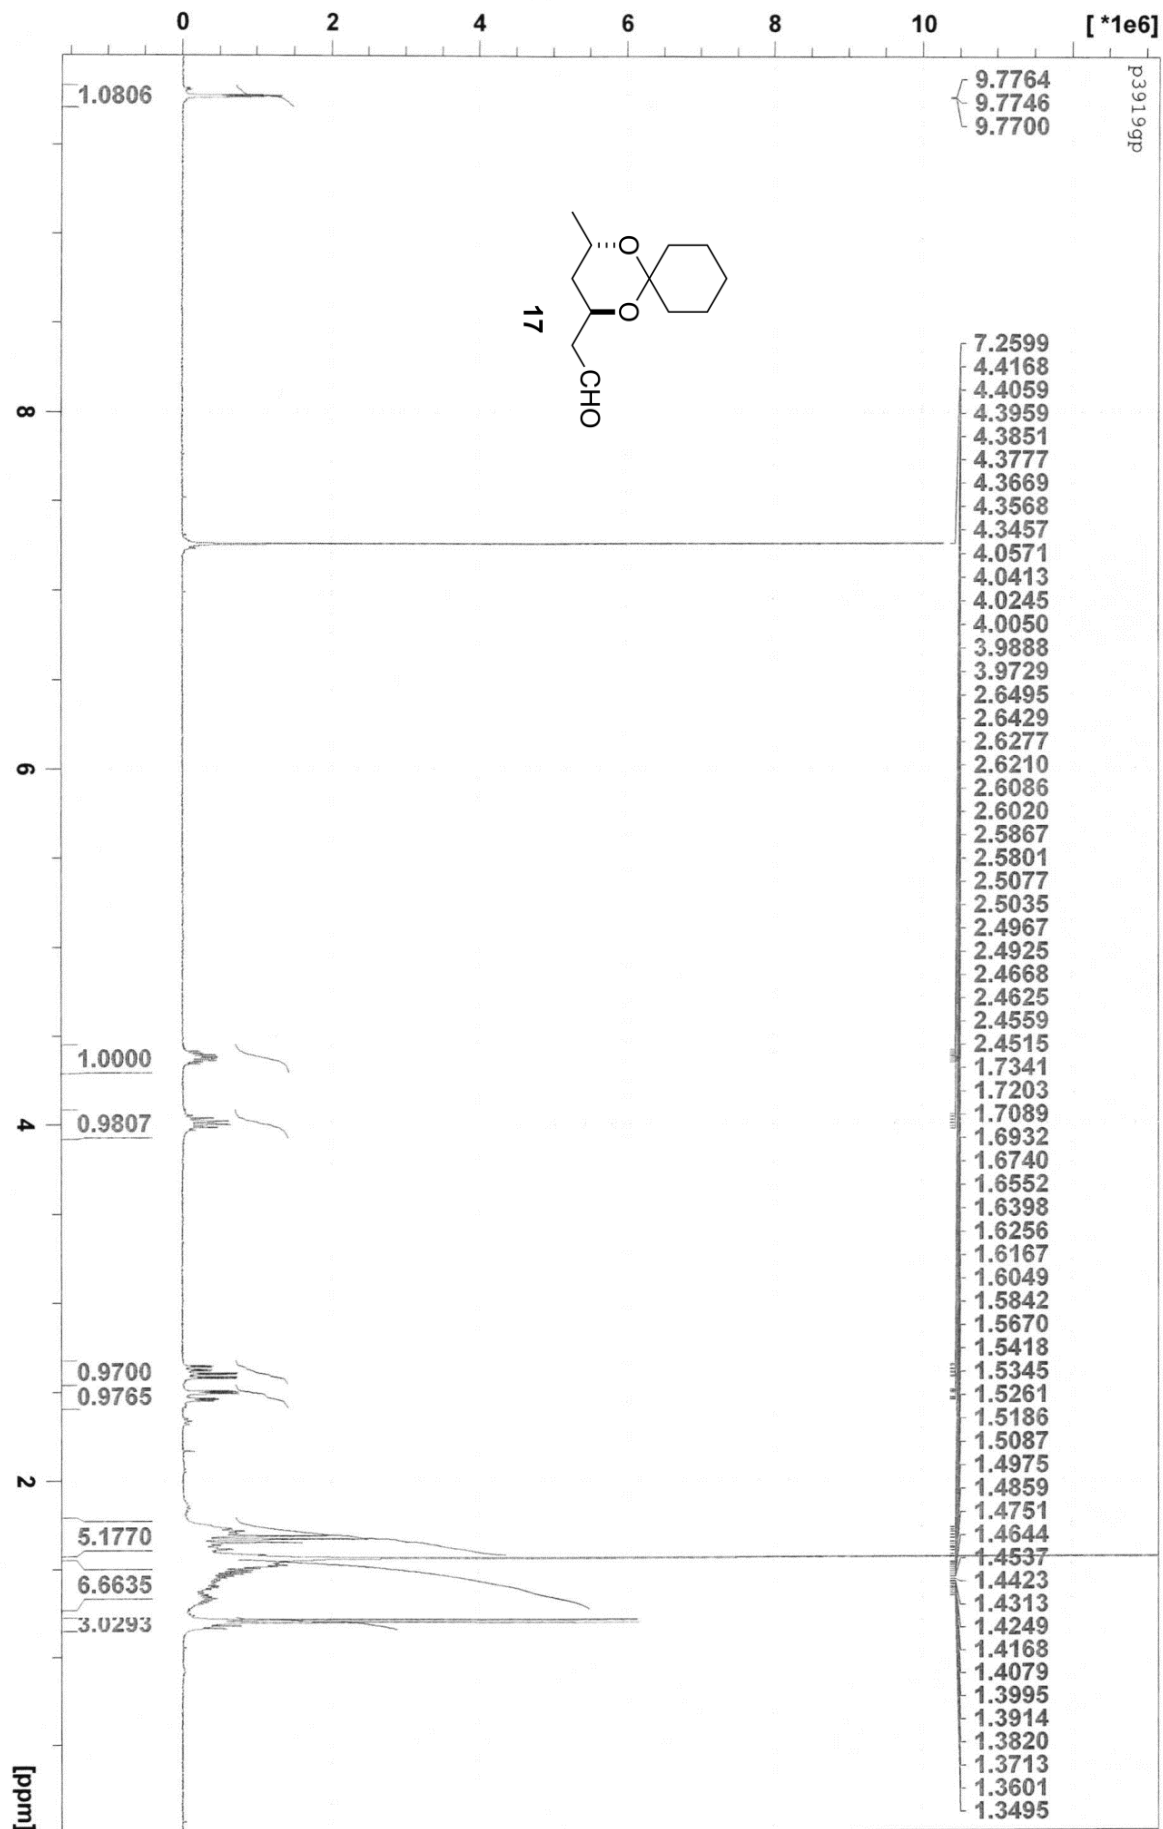

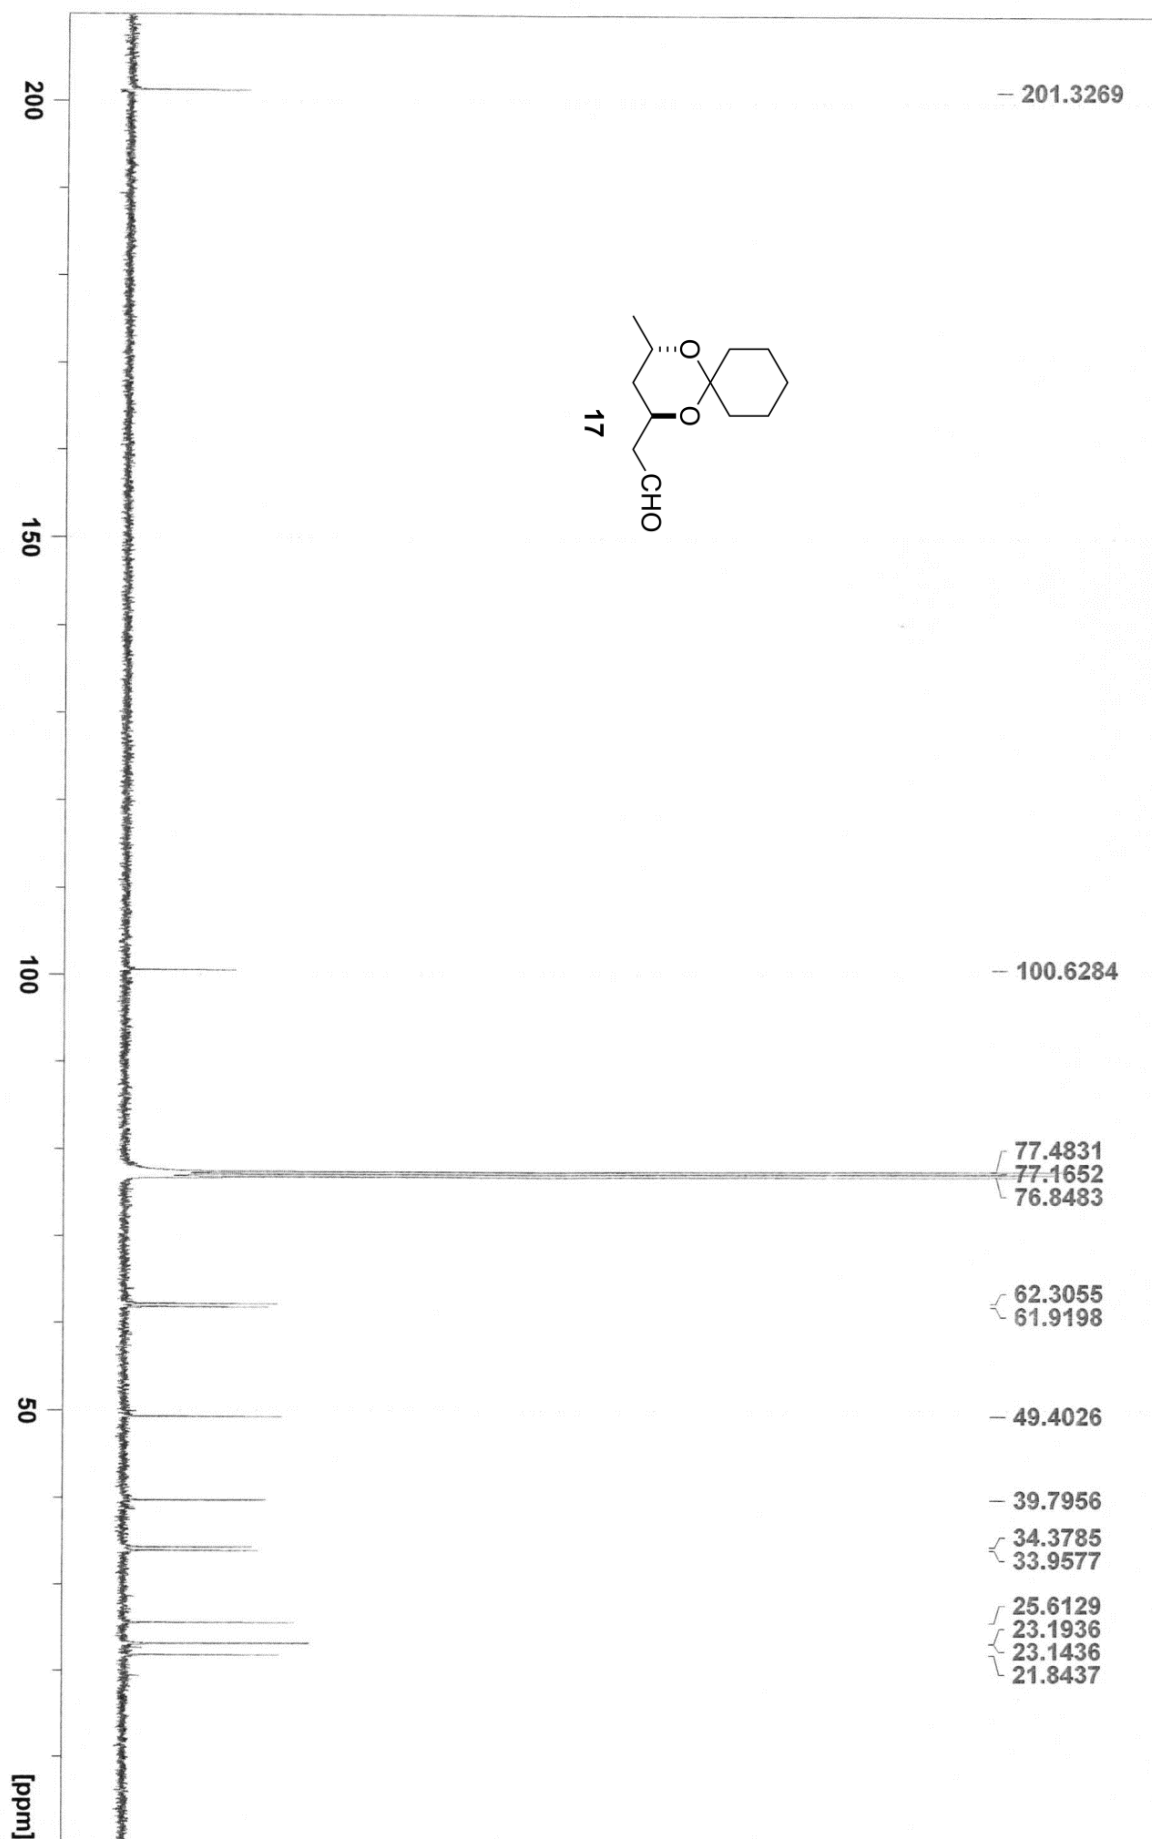



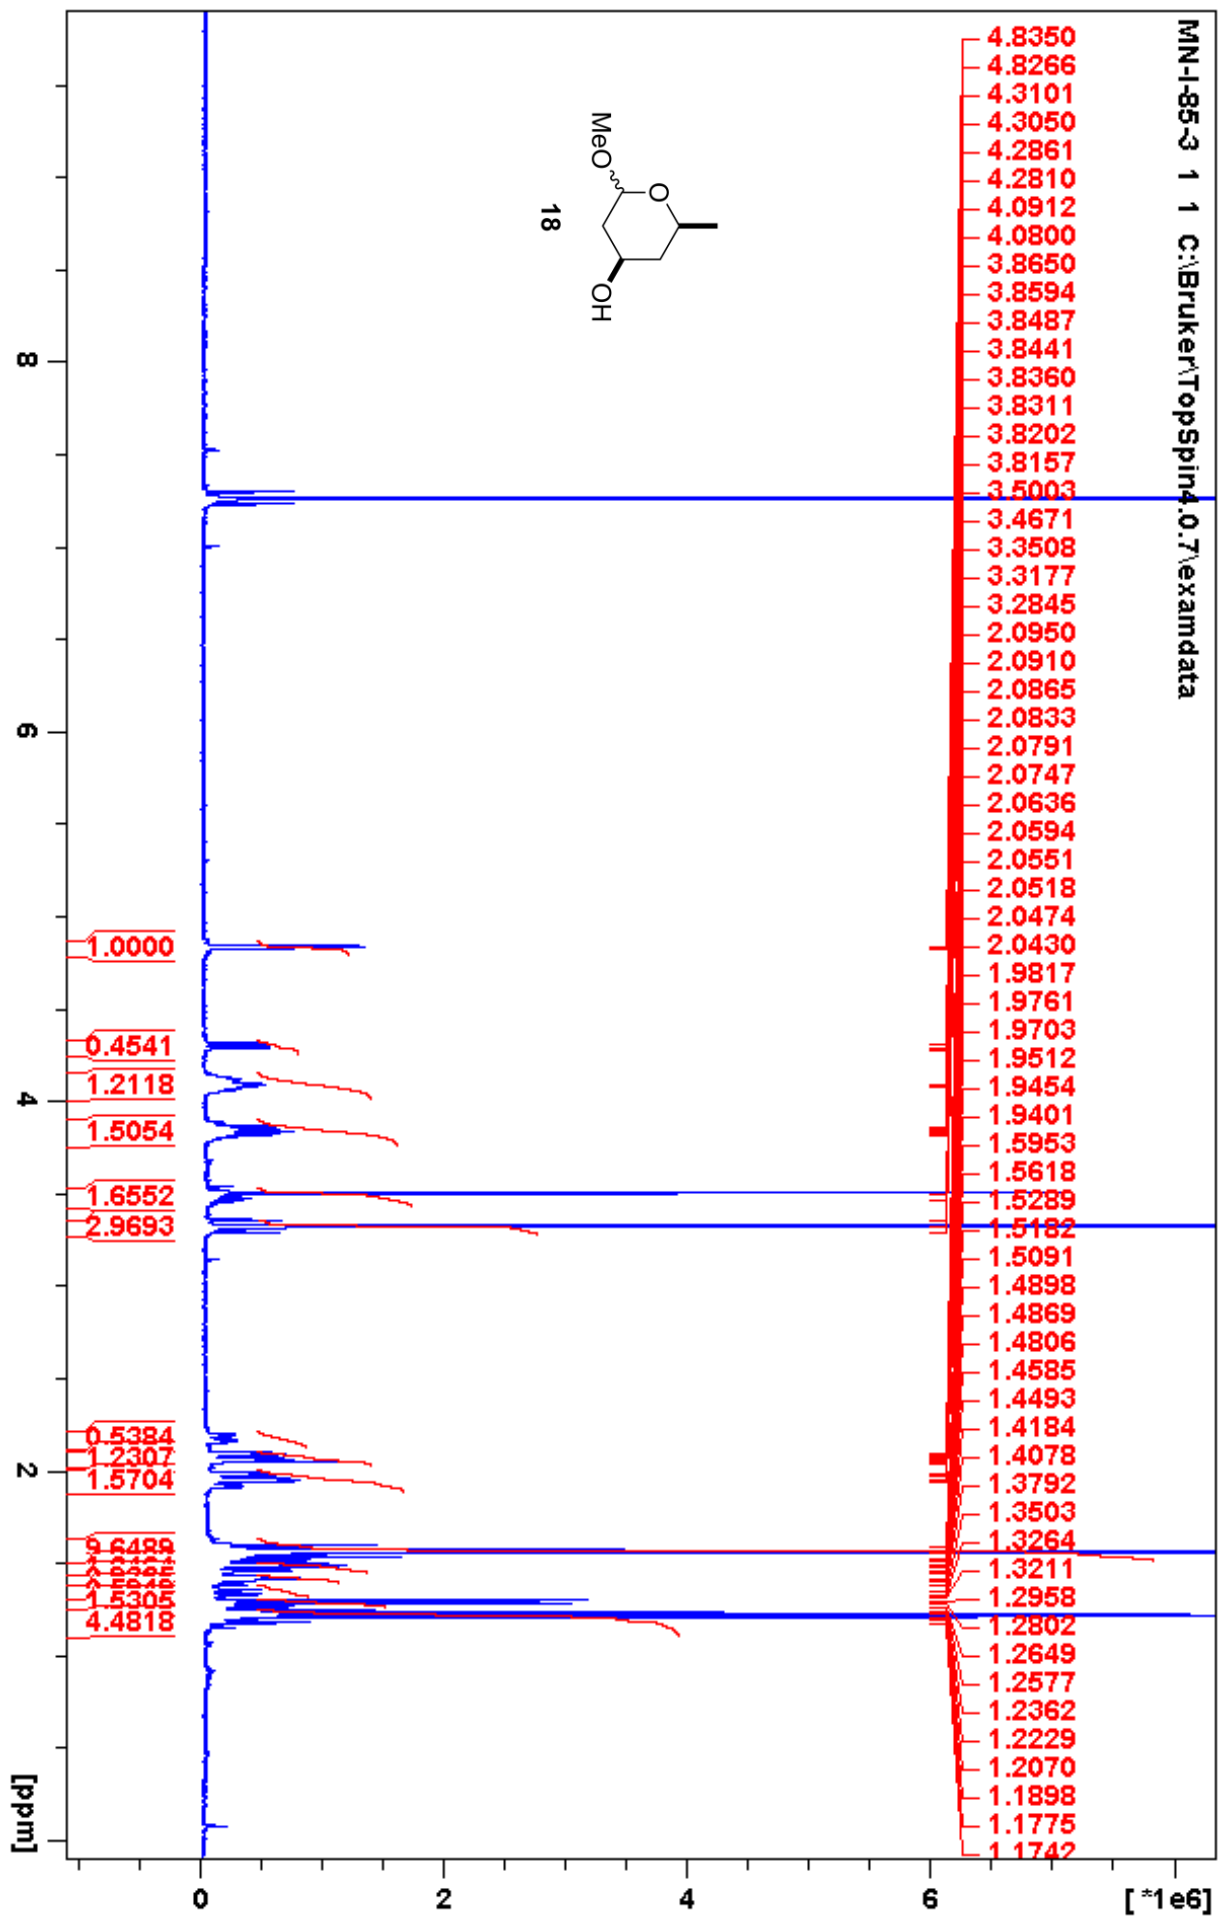

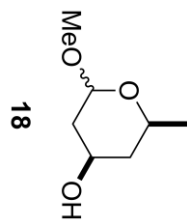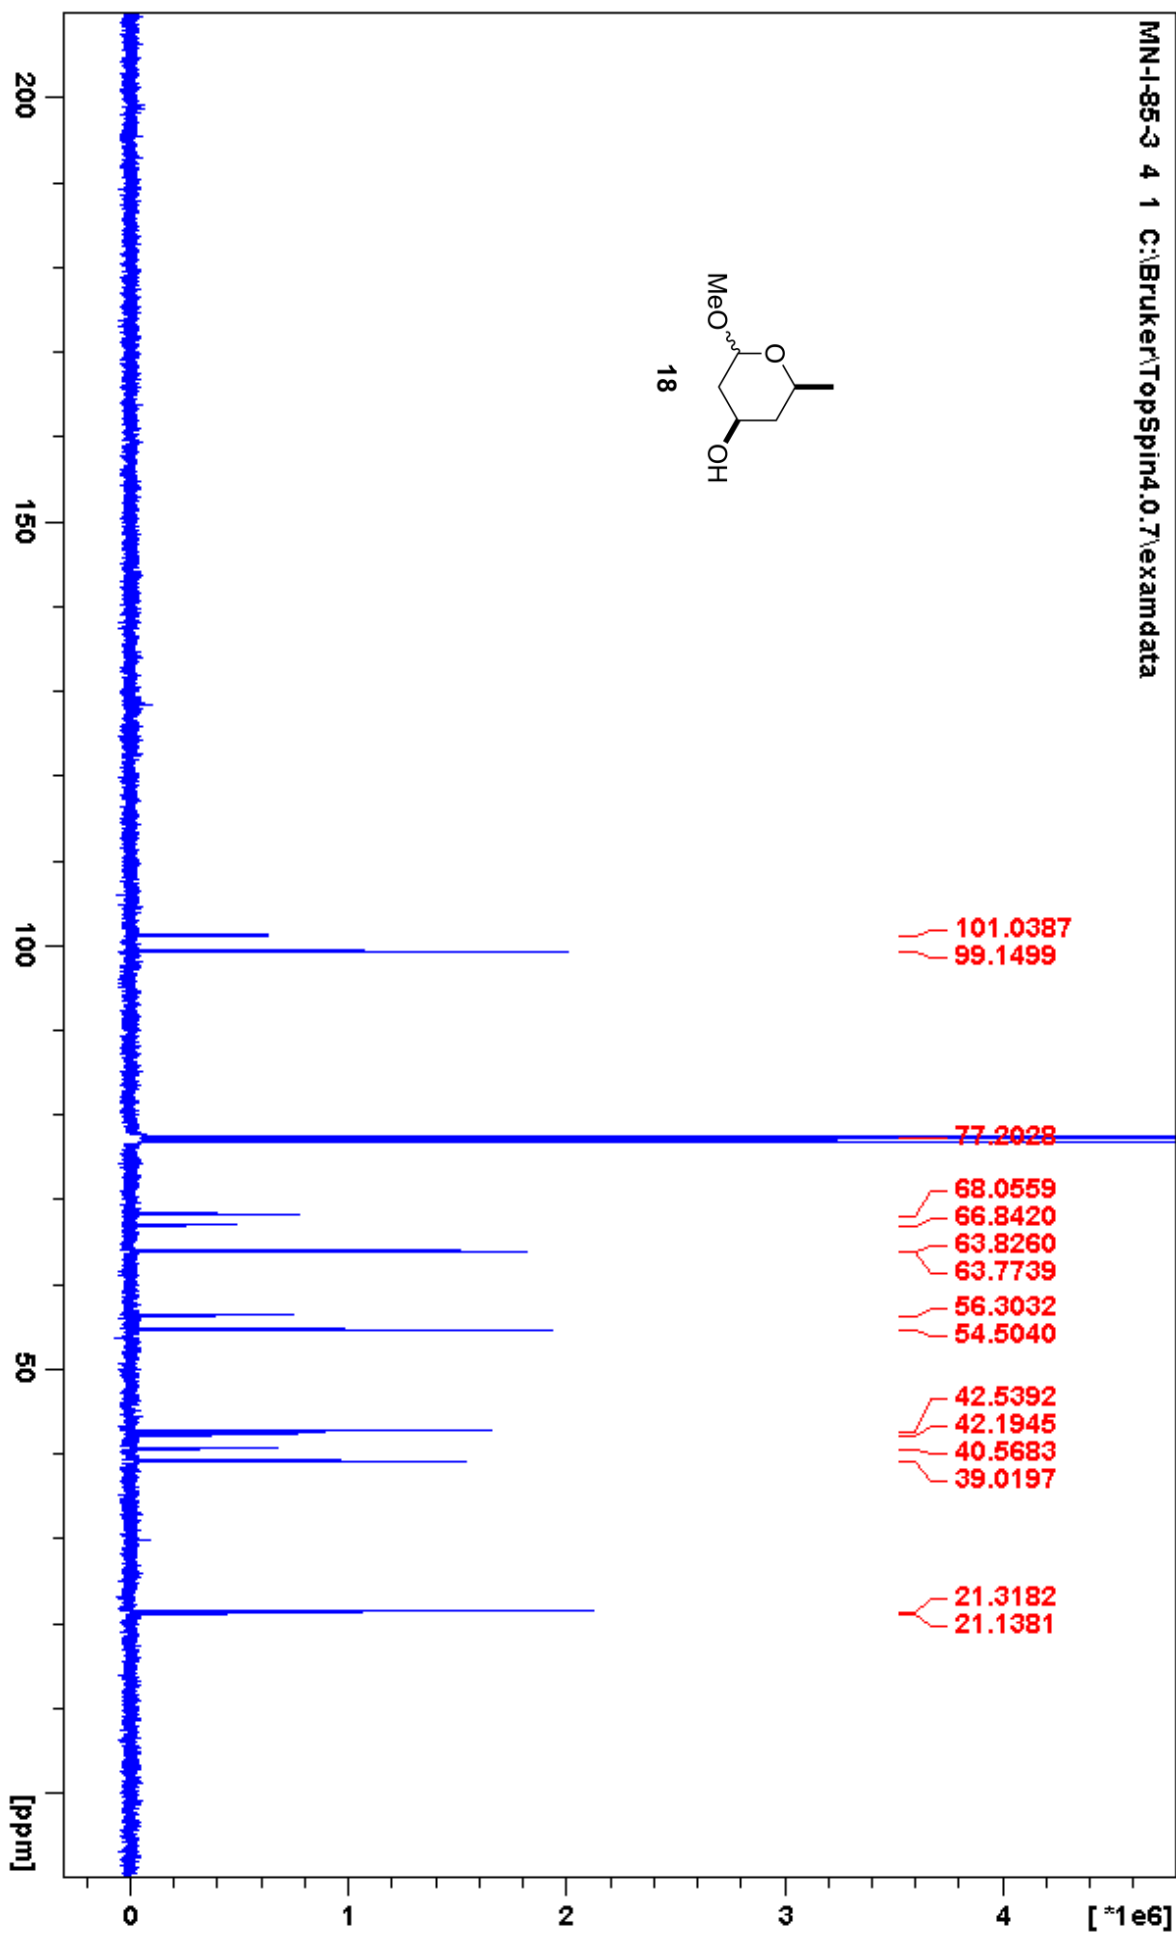

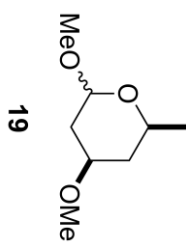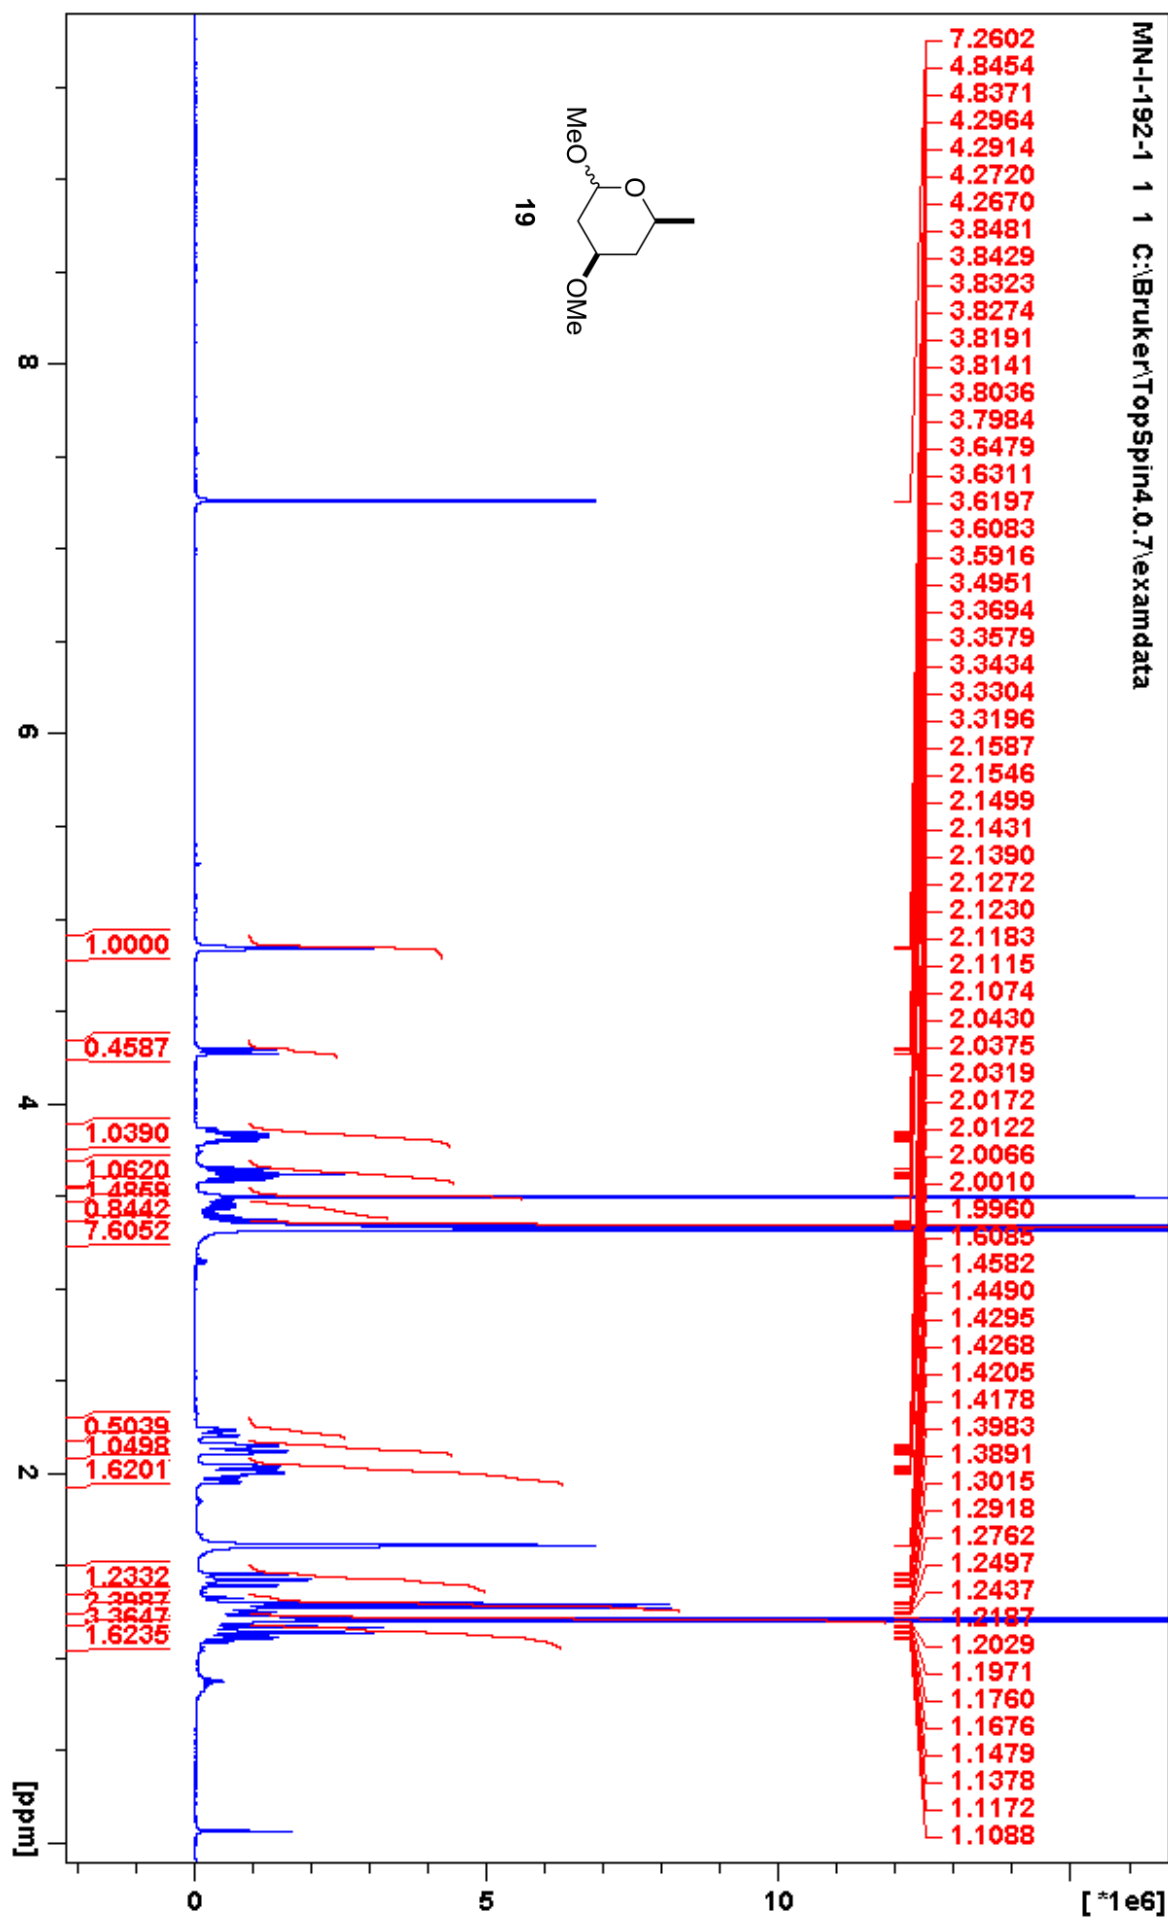

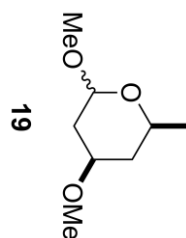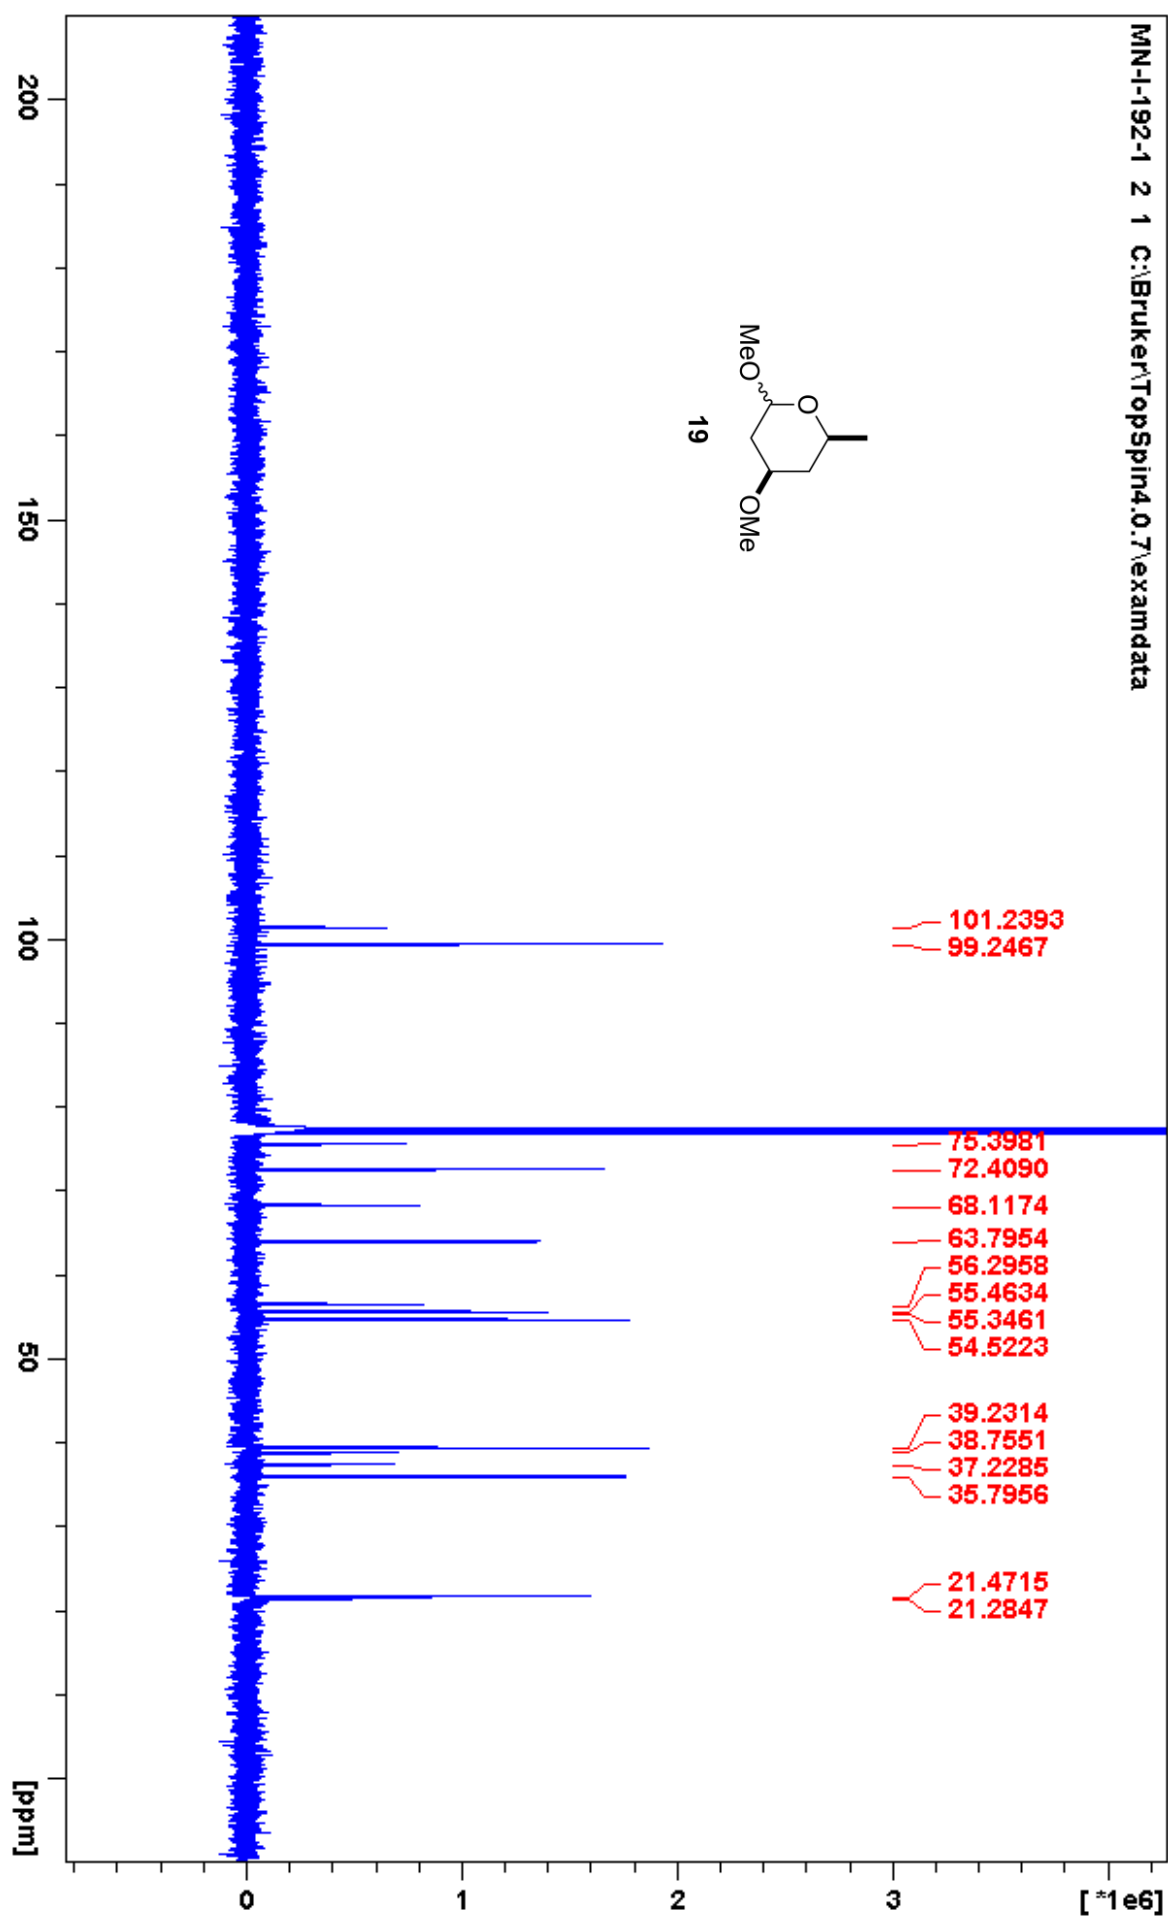

YMI-MN-I-118-2 1 1 d: Kiyoshi

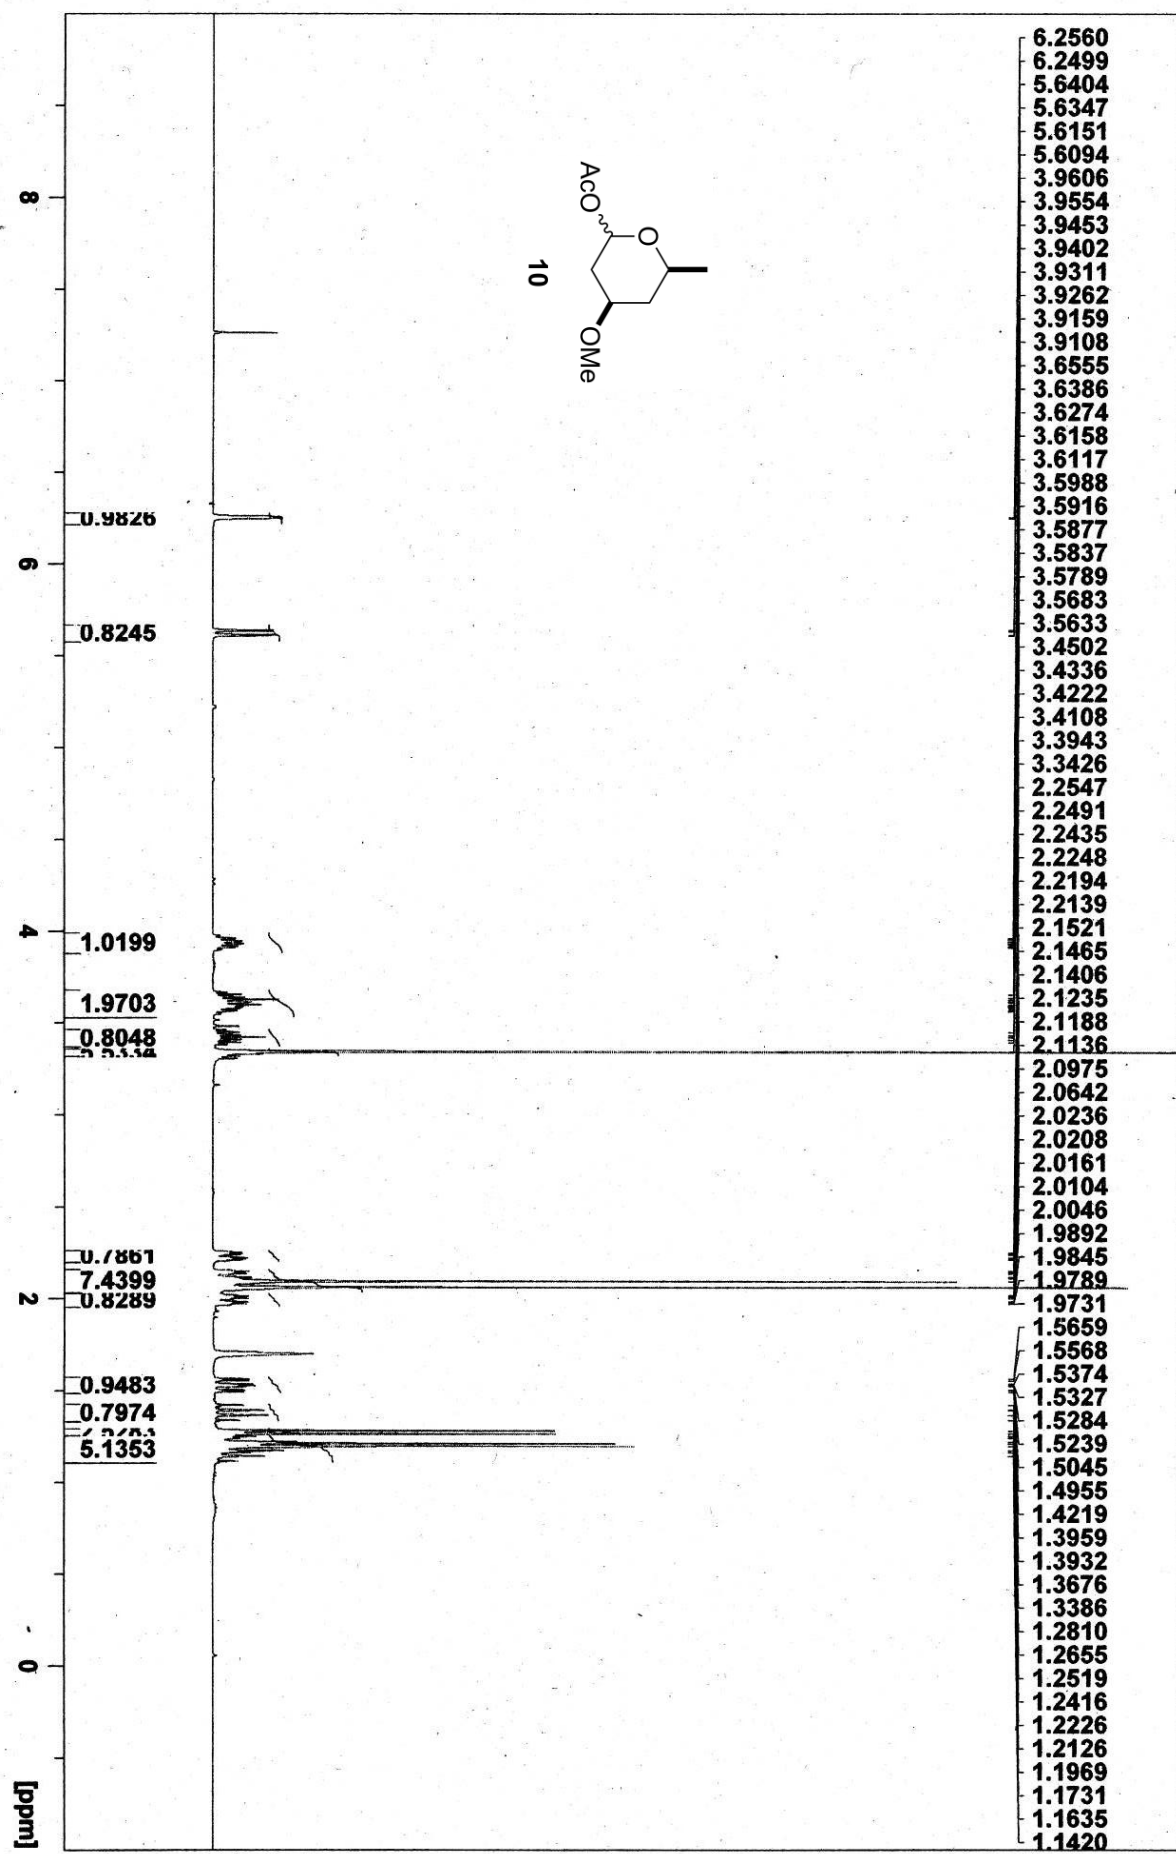

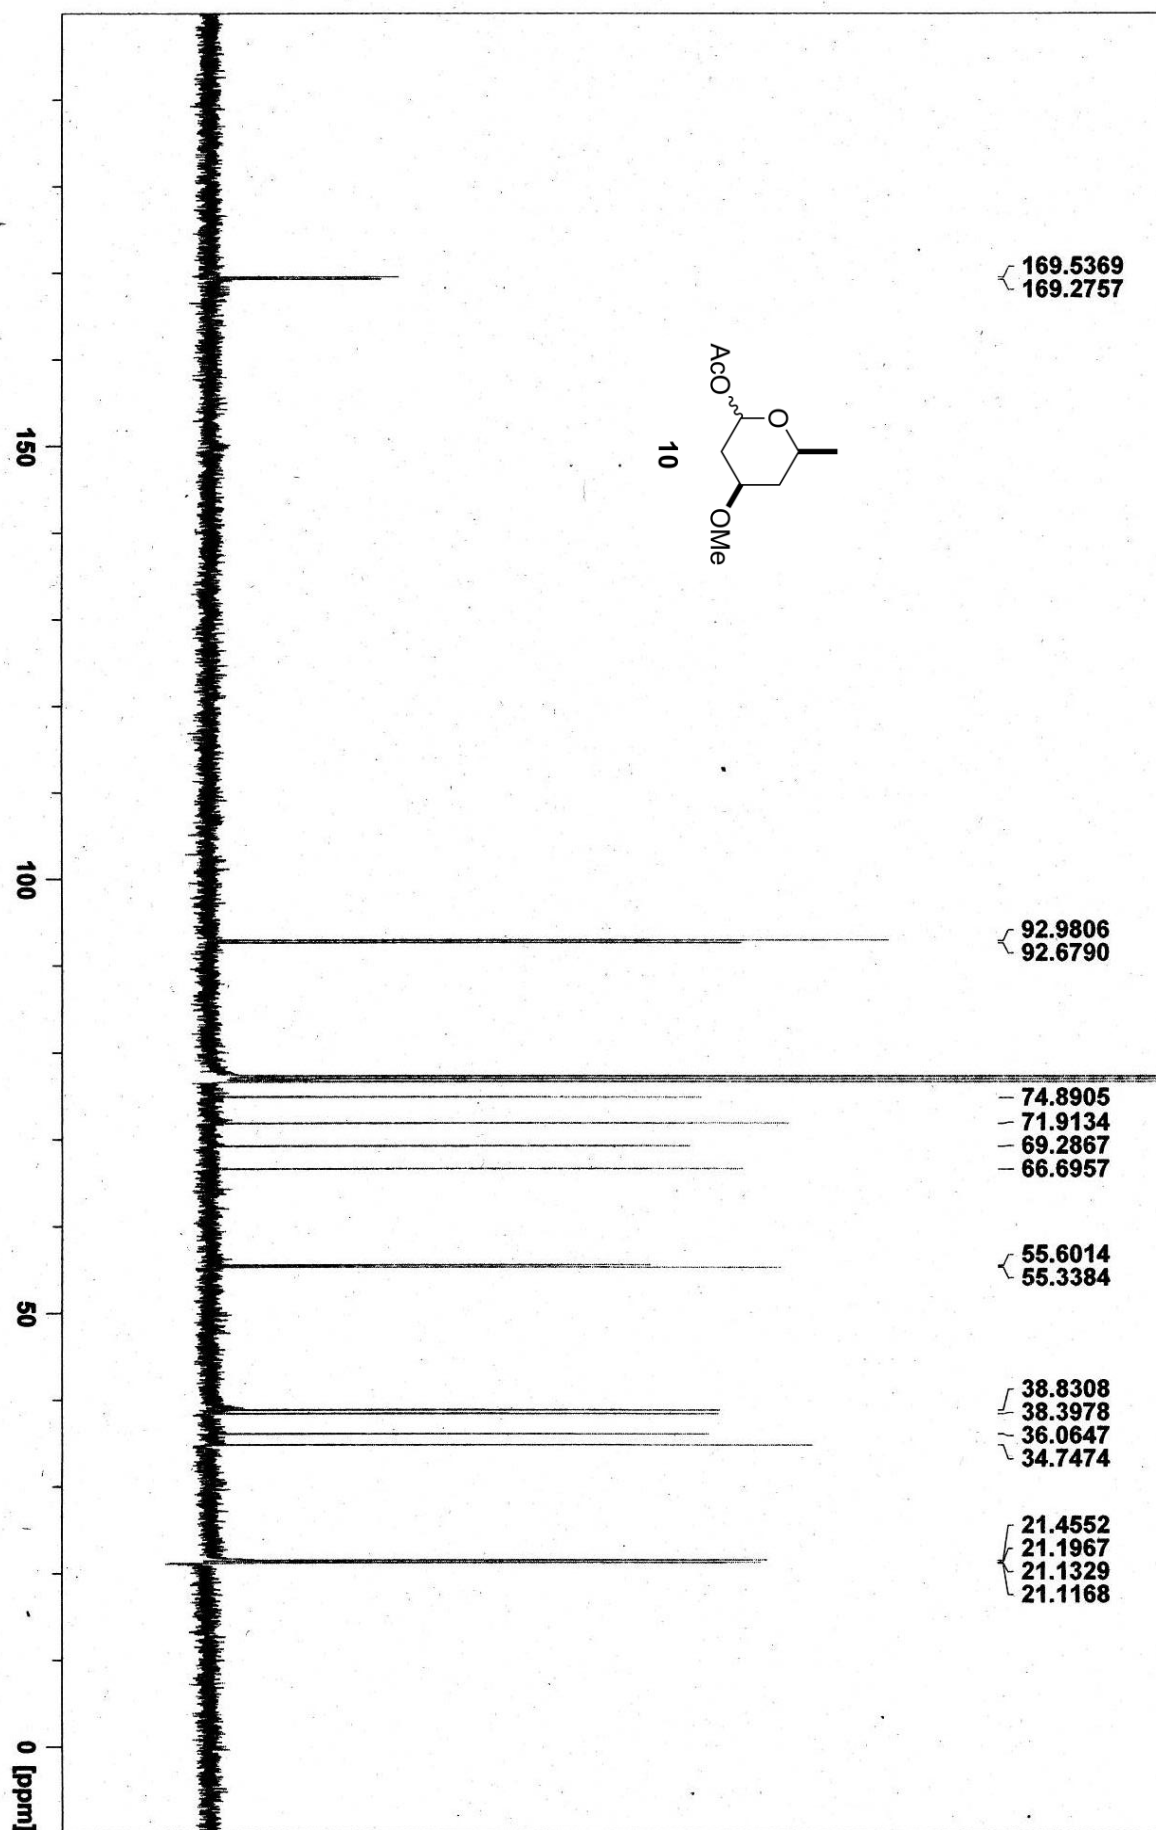

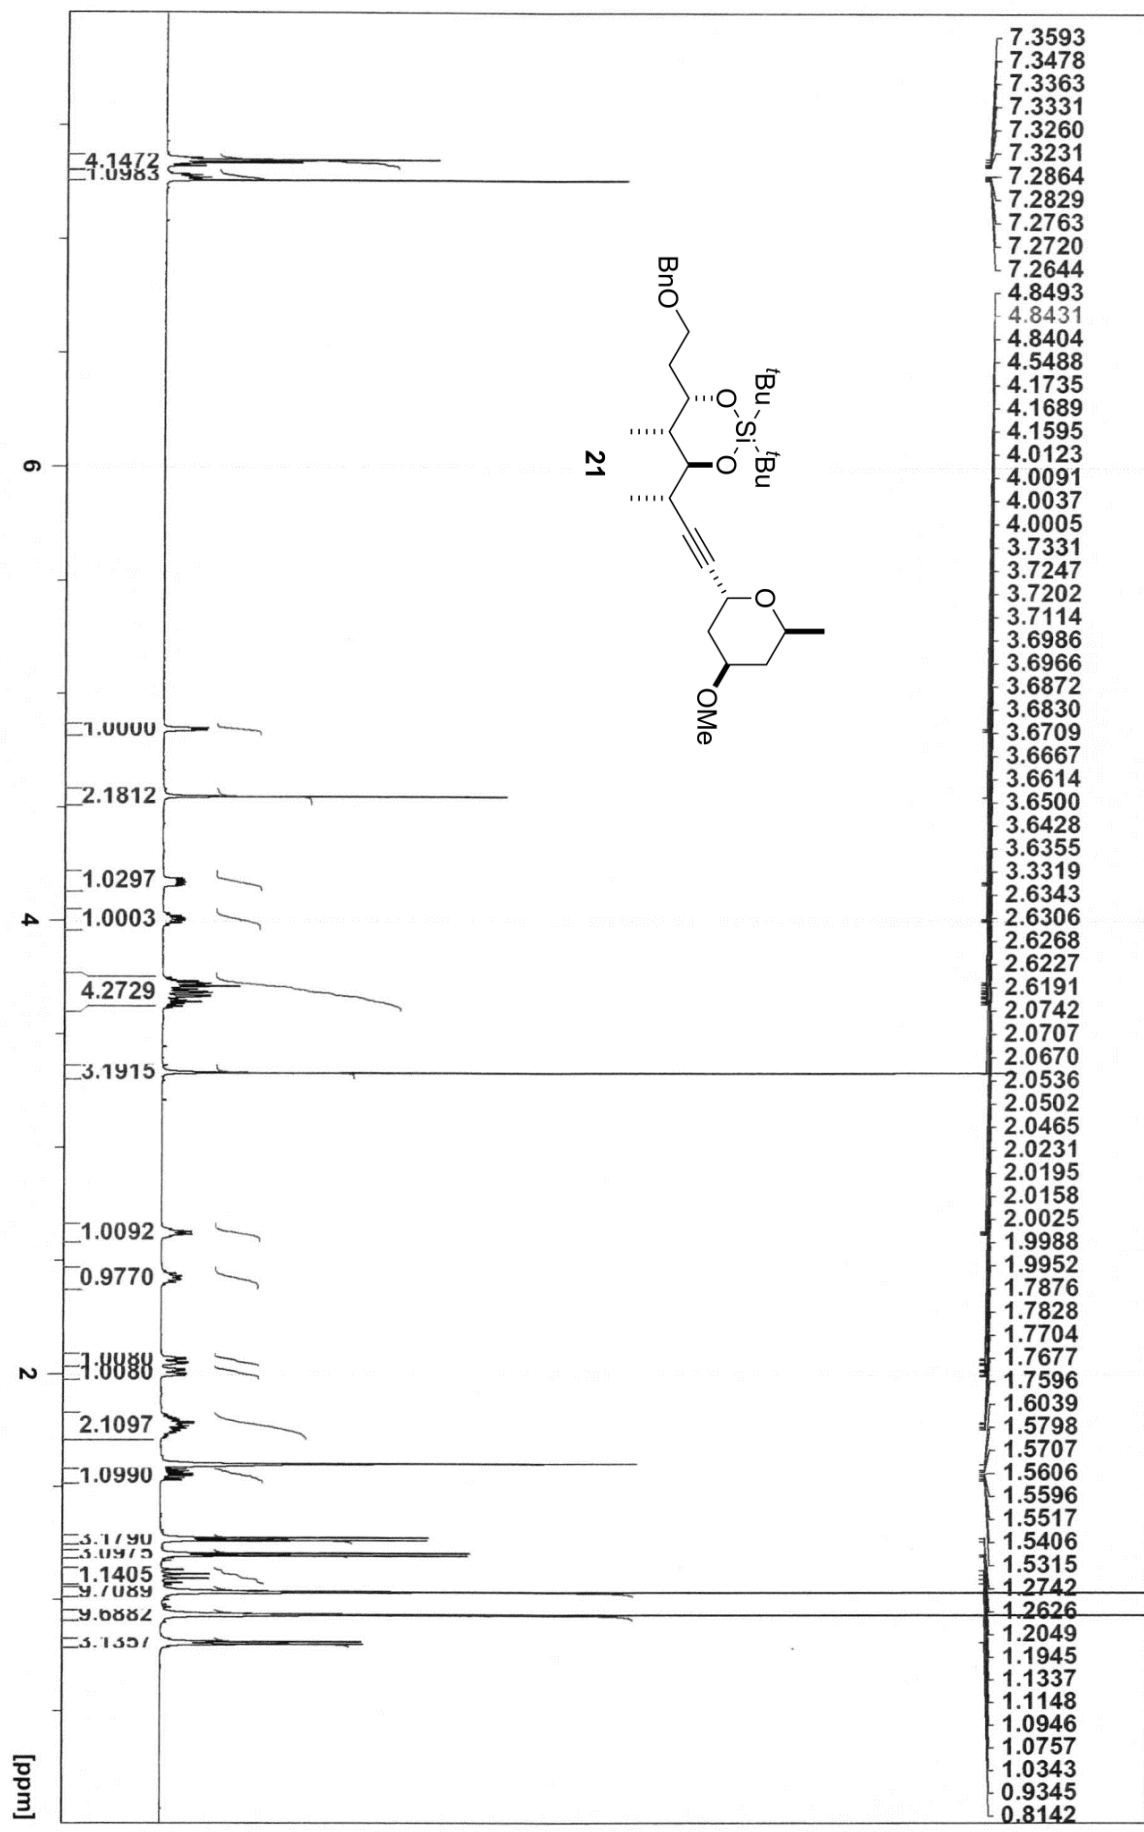

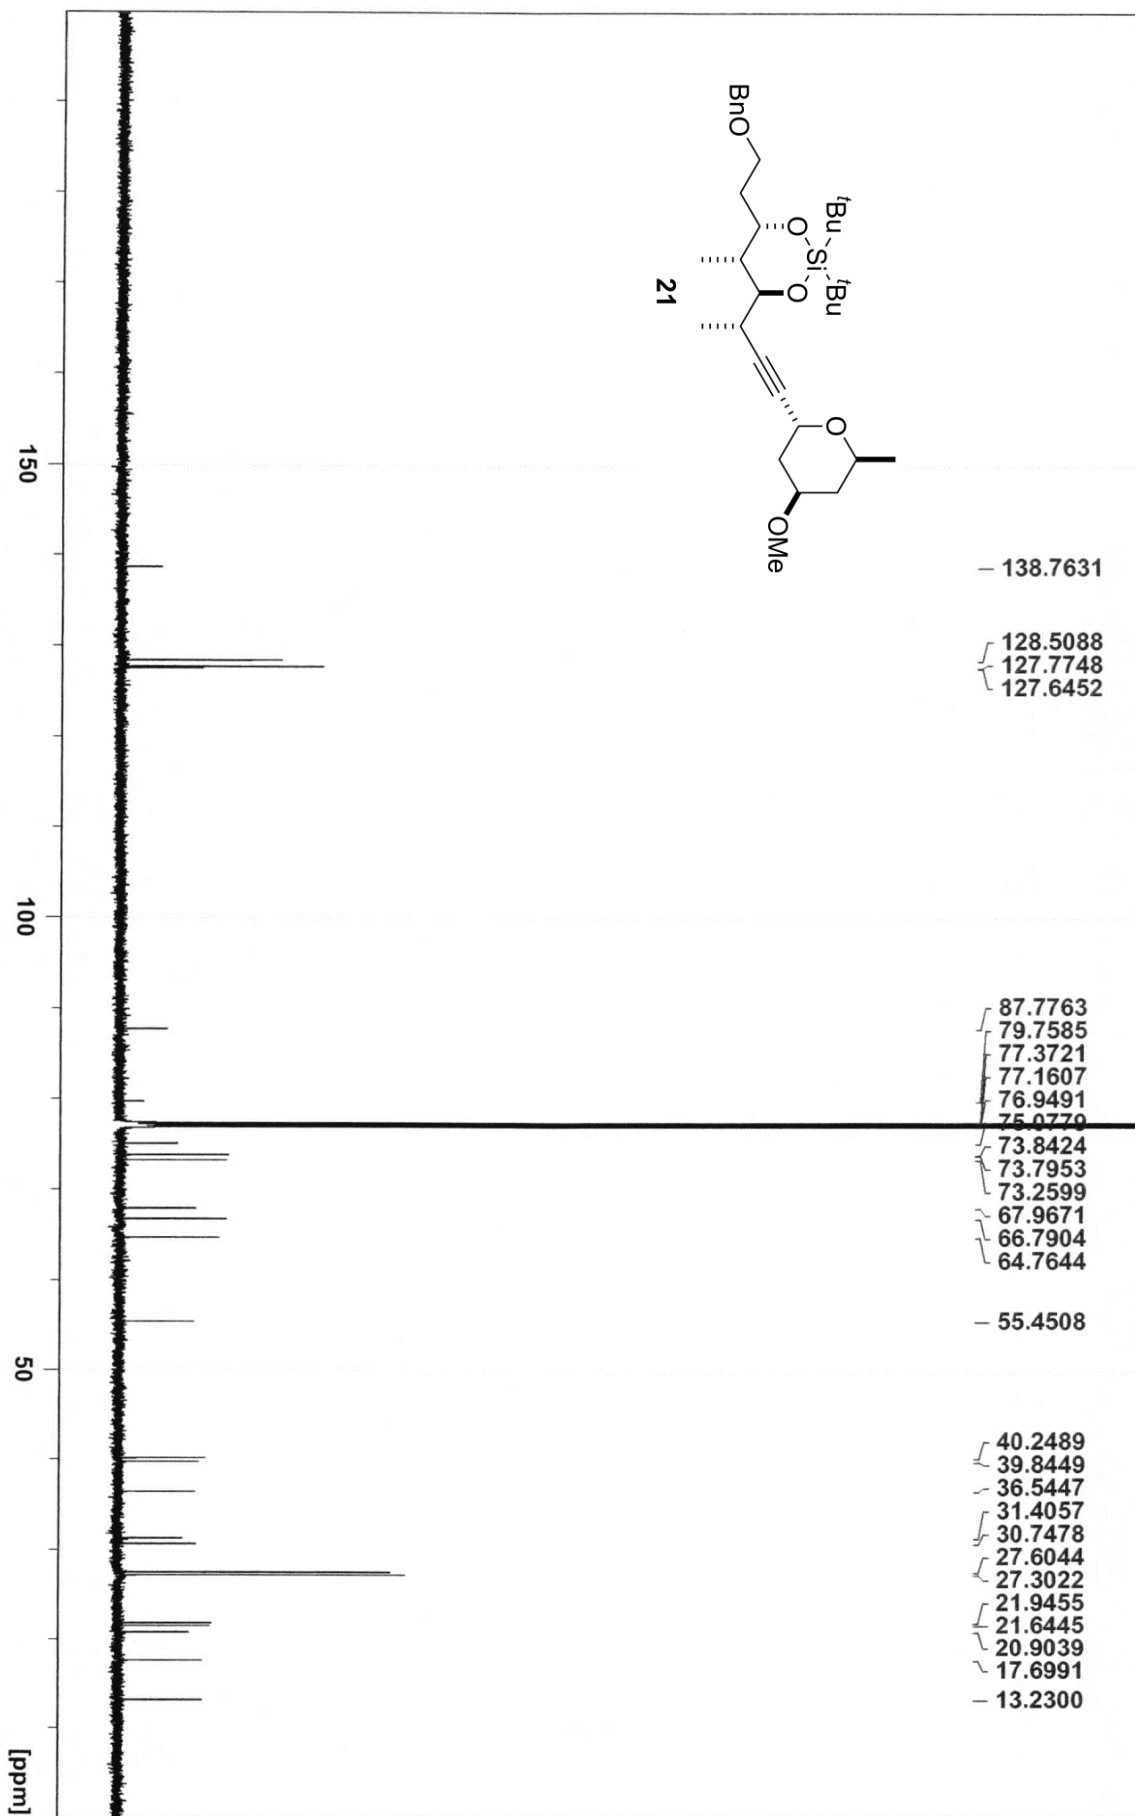



to-II-15-3,5-COSY 1 1 d: kigoshi

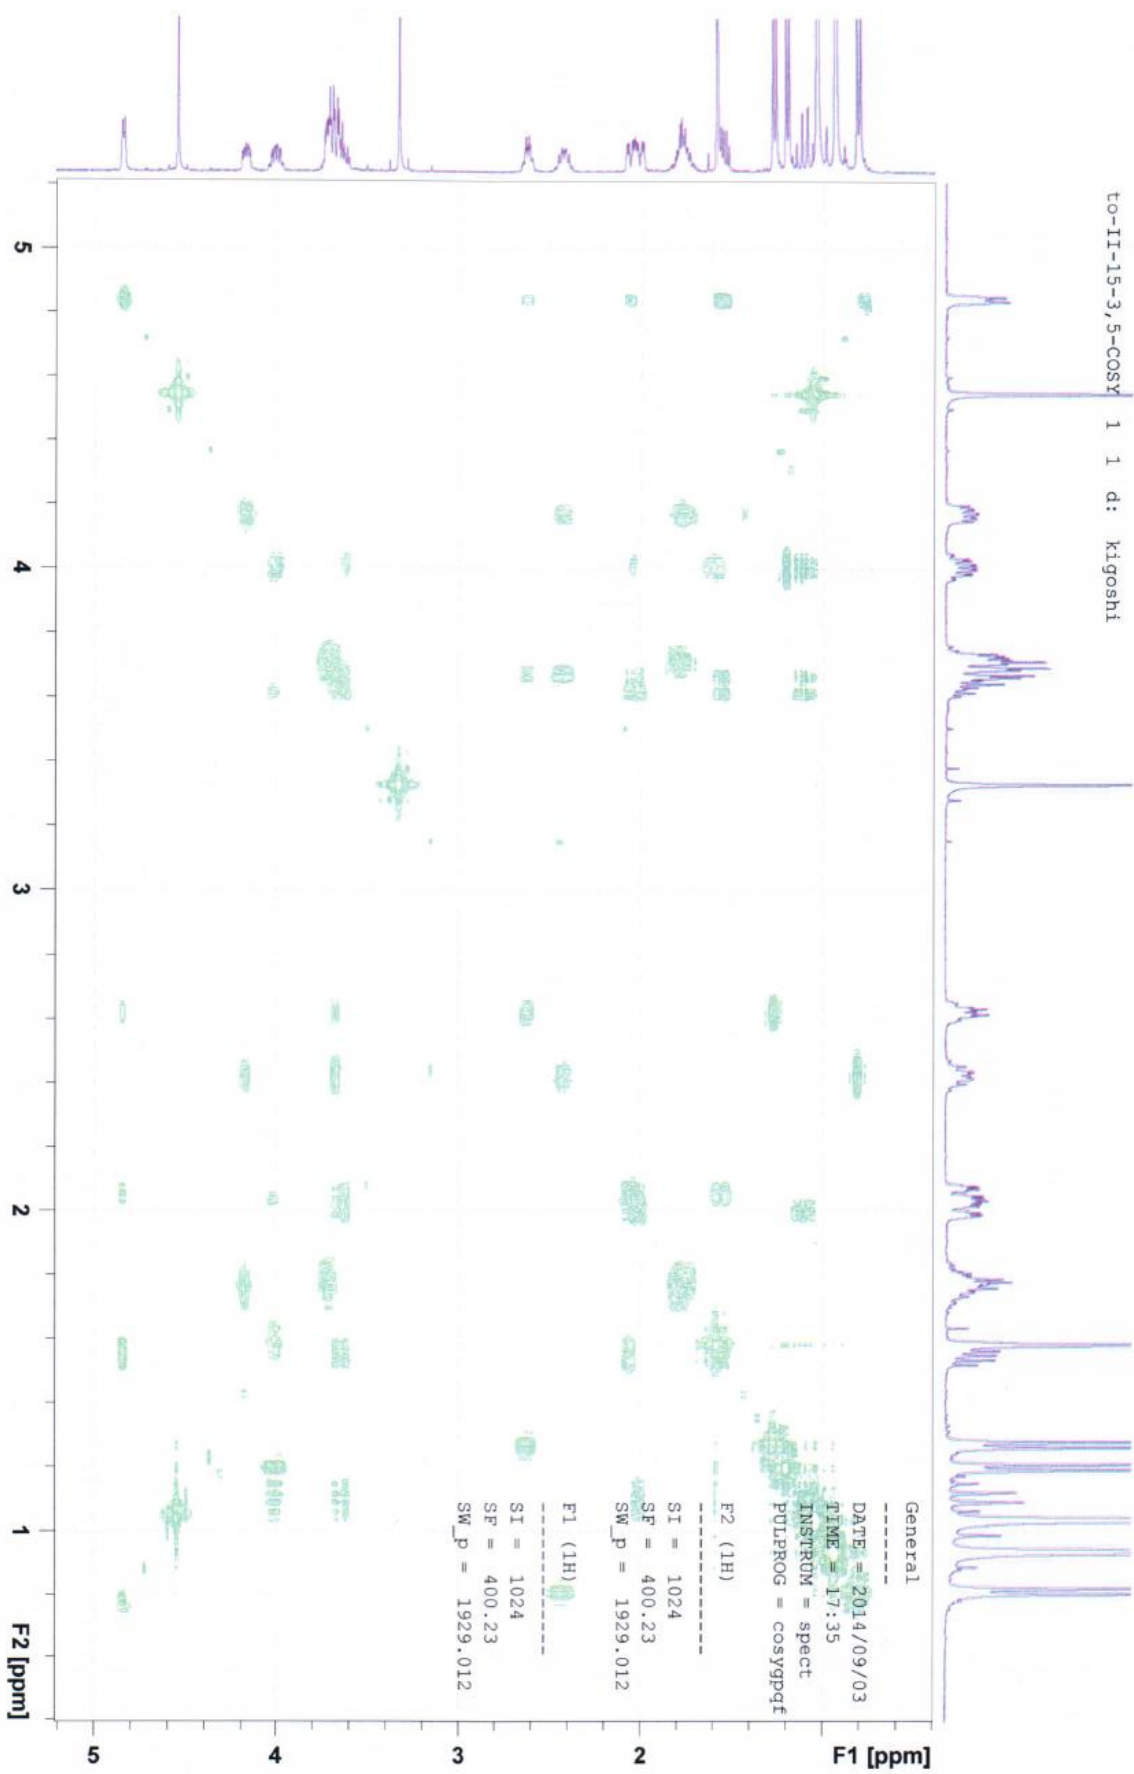

H-H COSY spectrum of compound 21

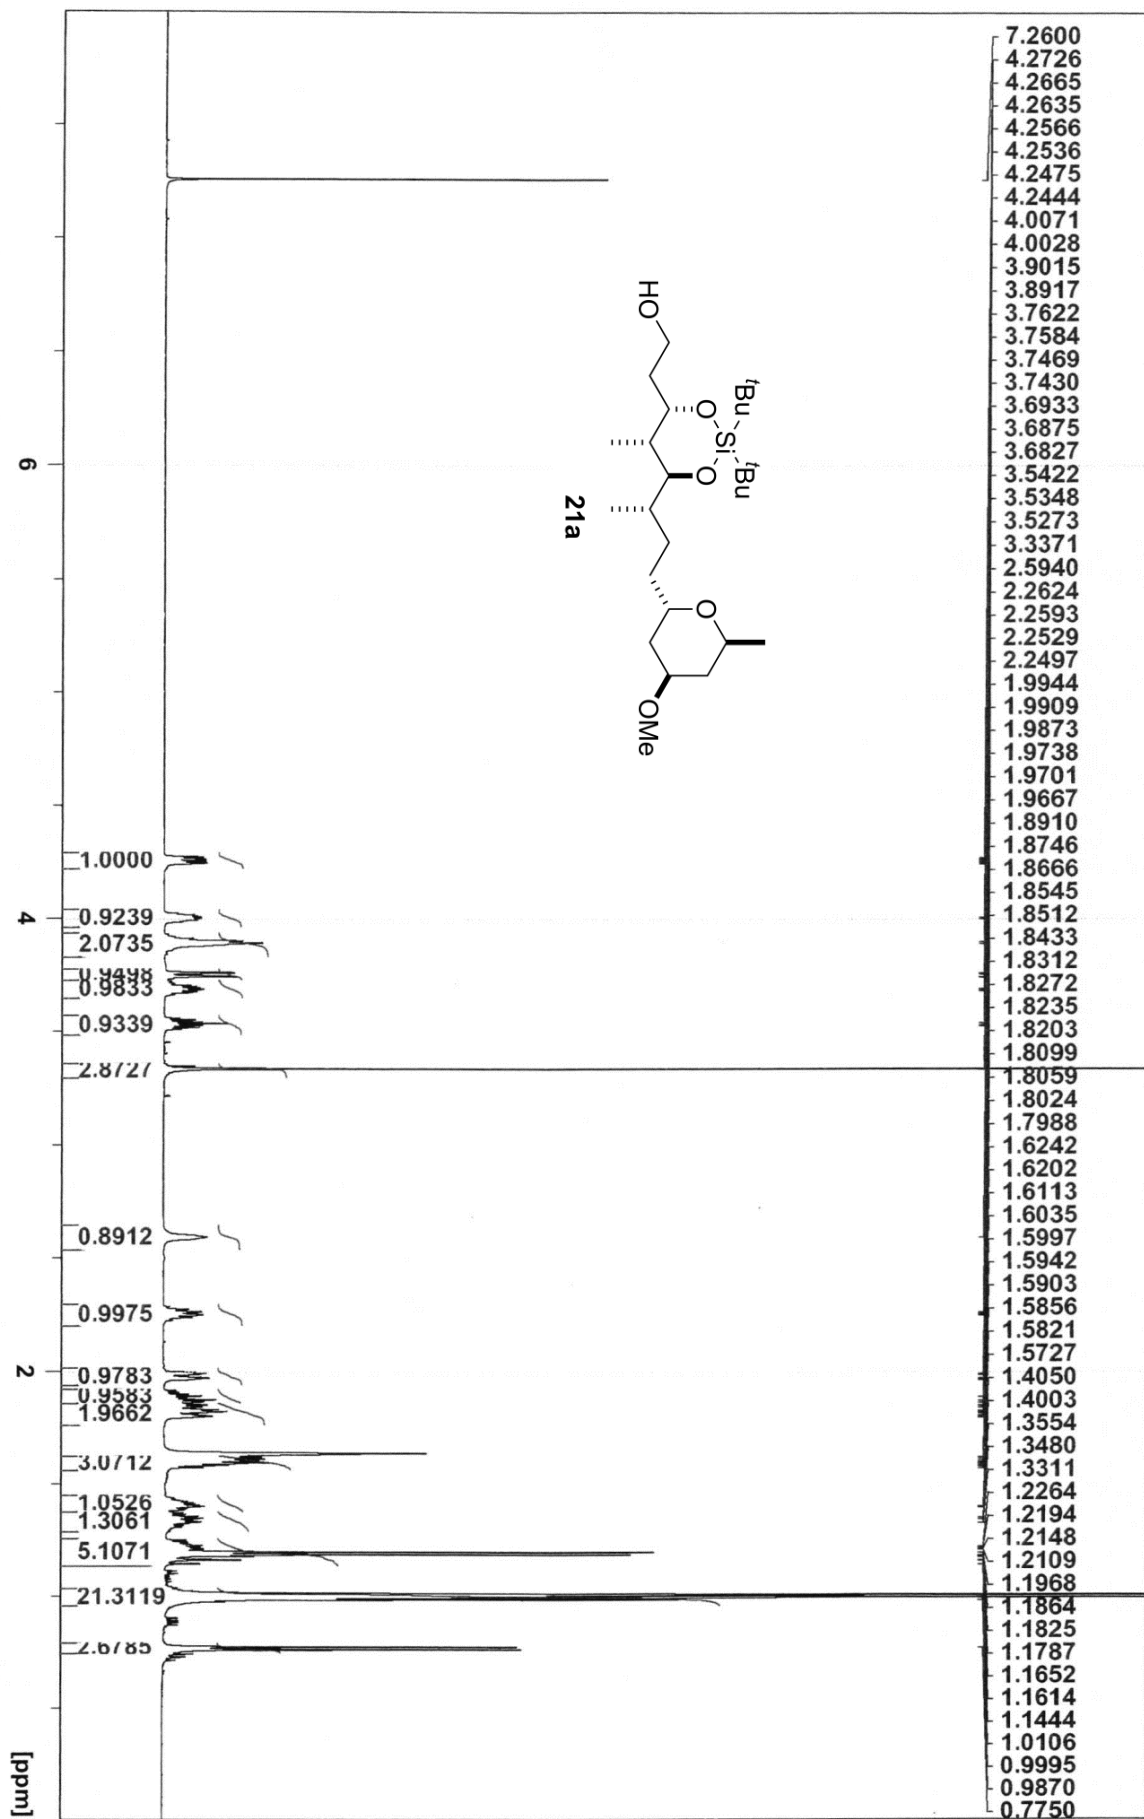

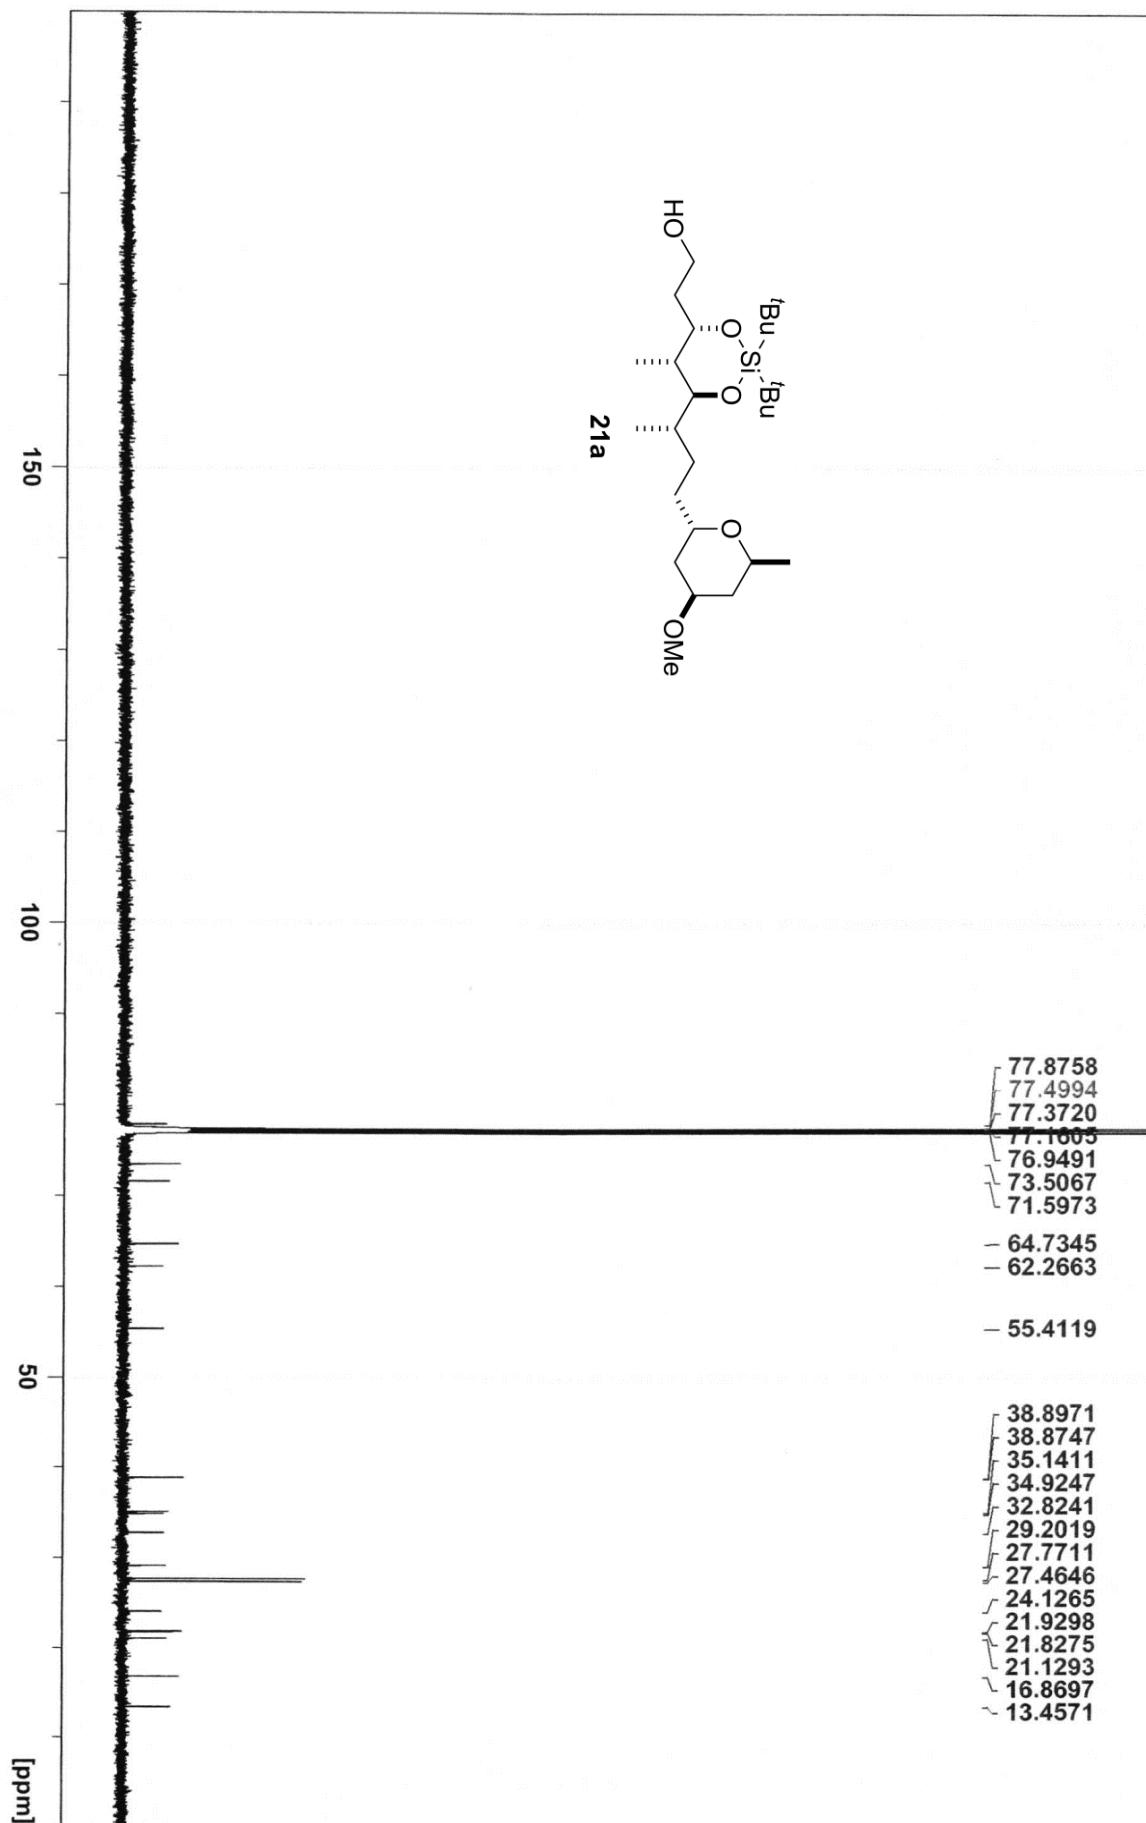

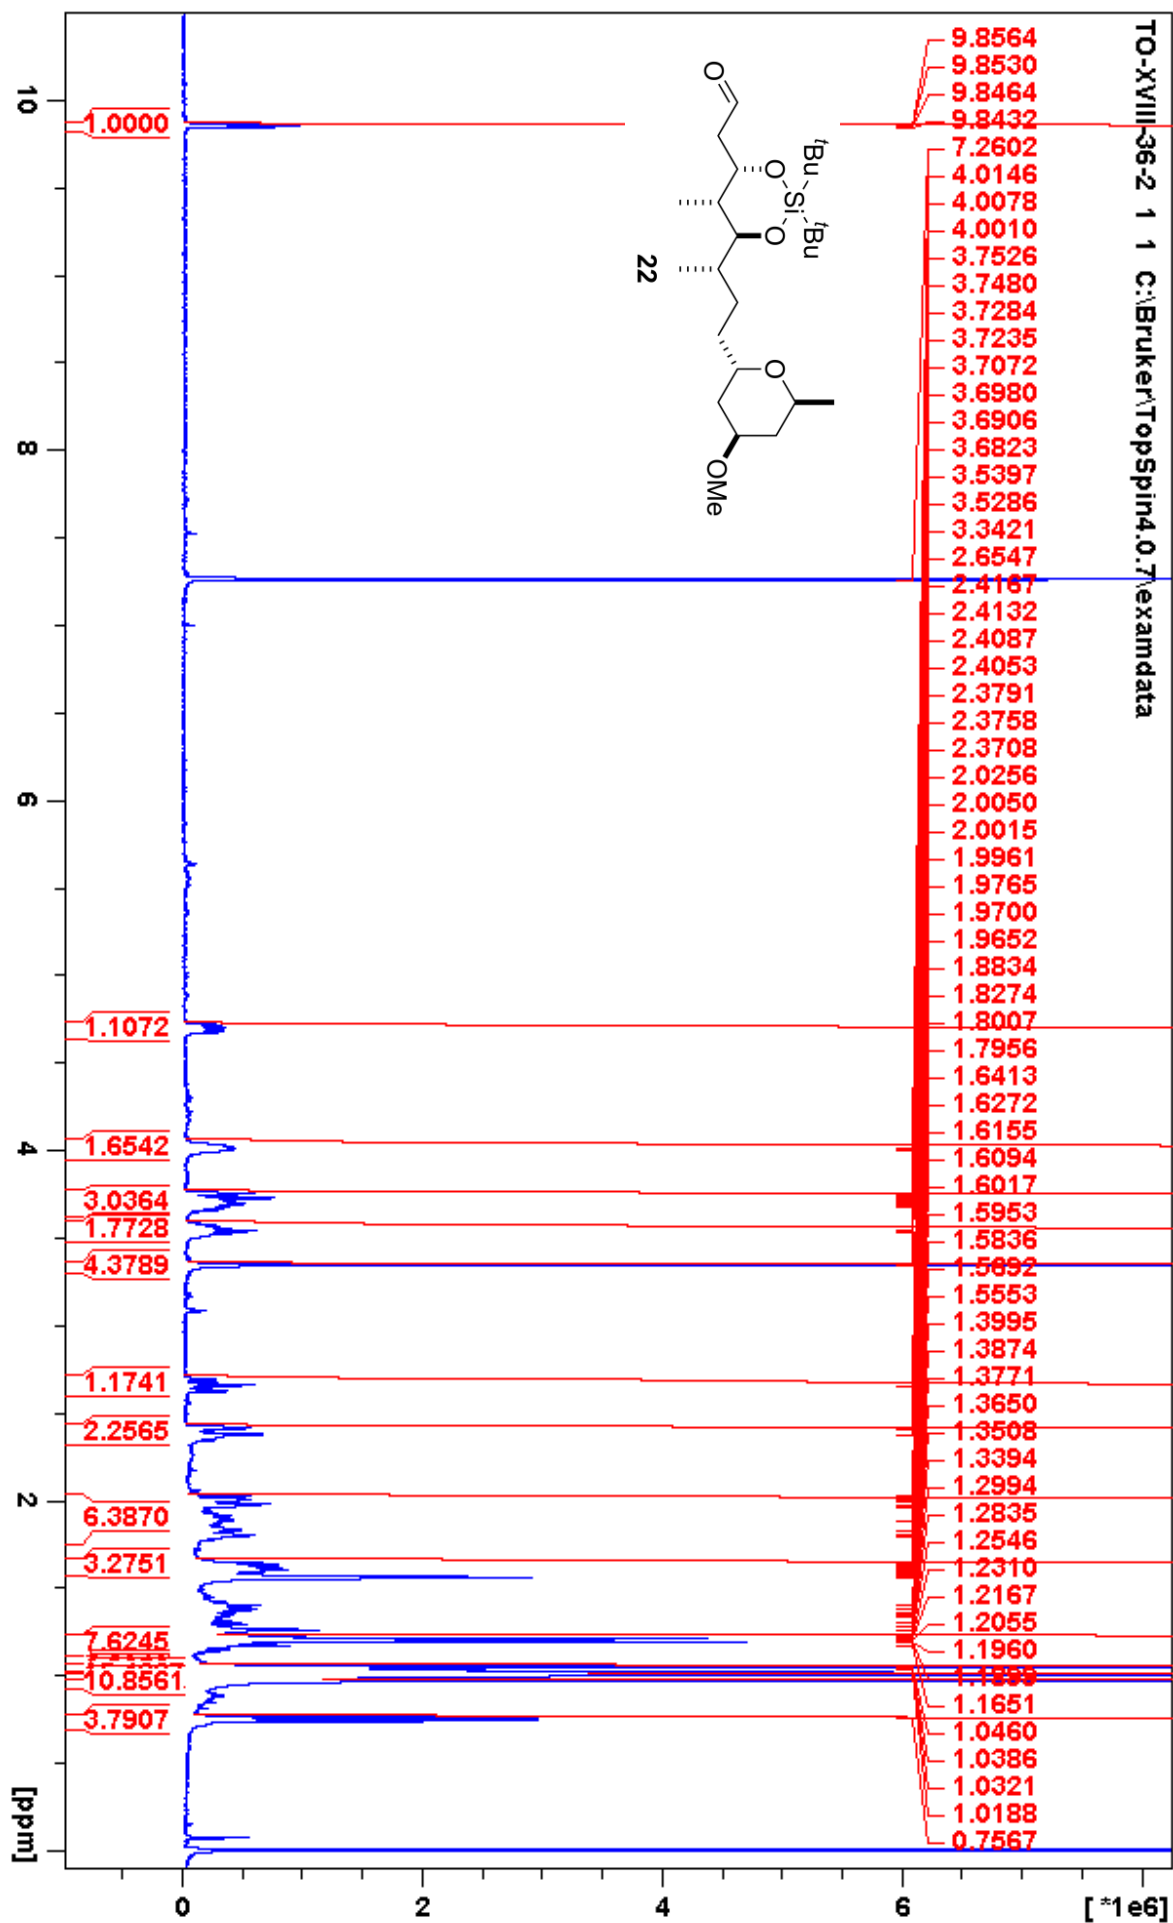

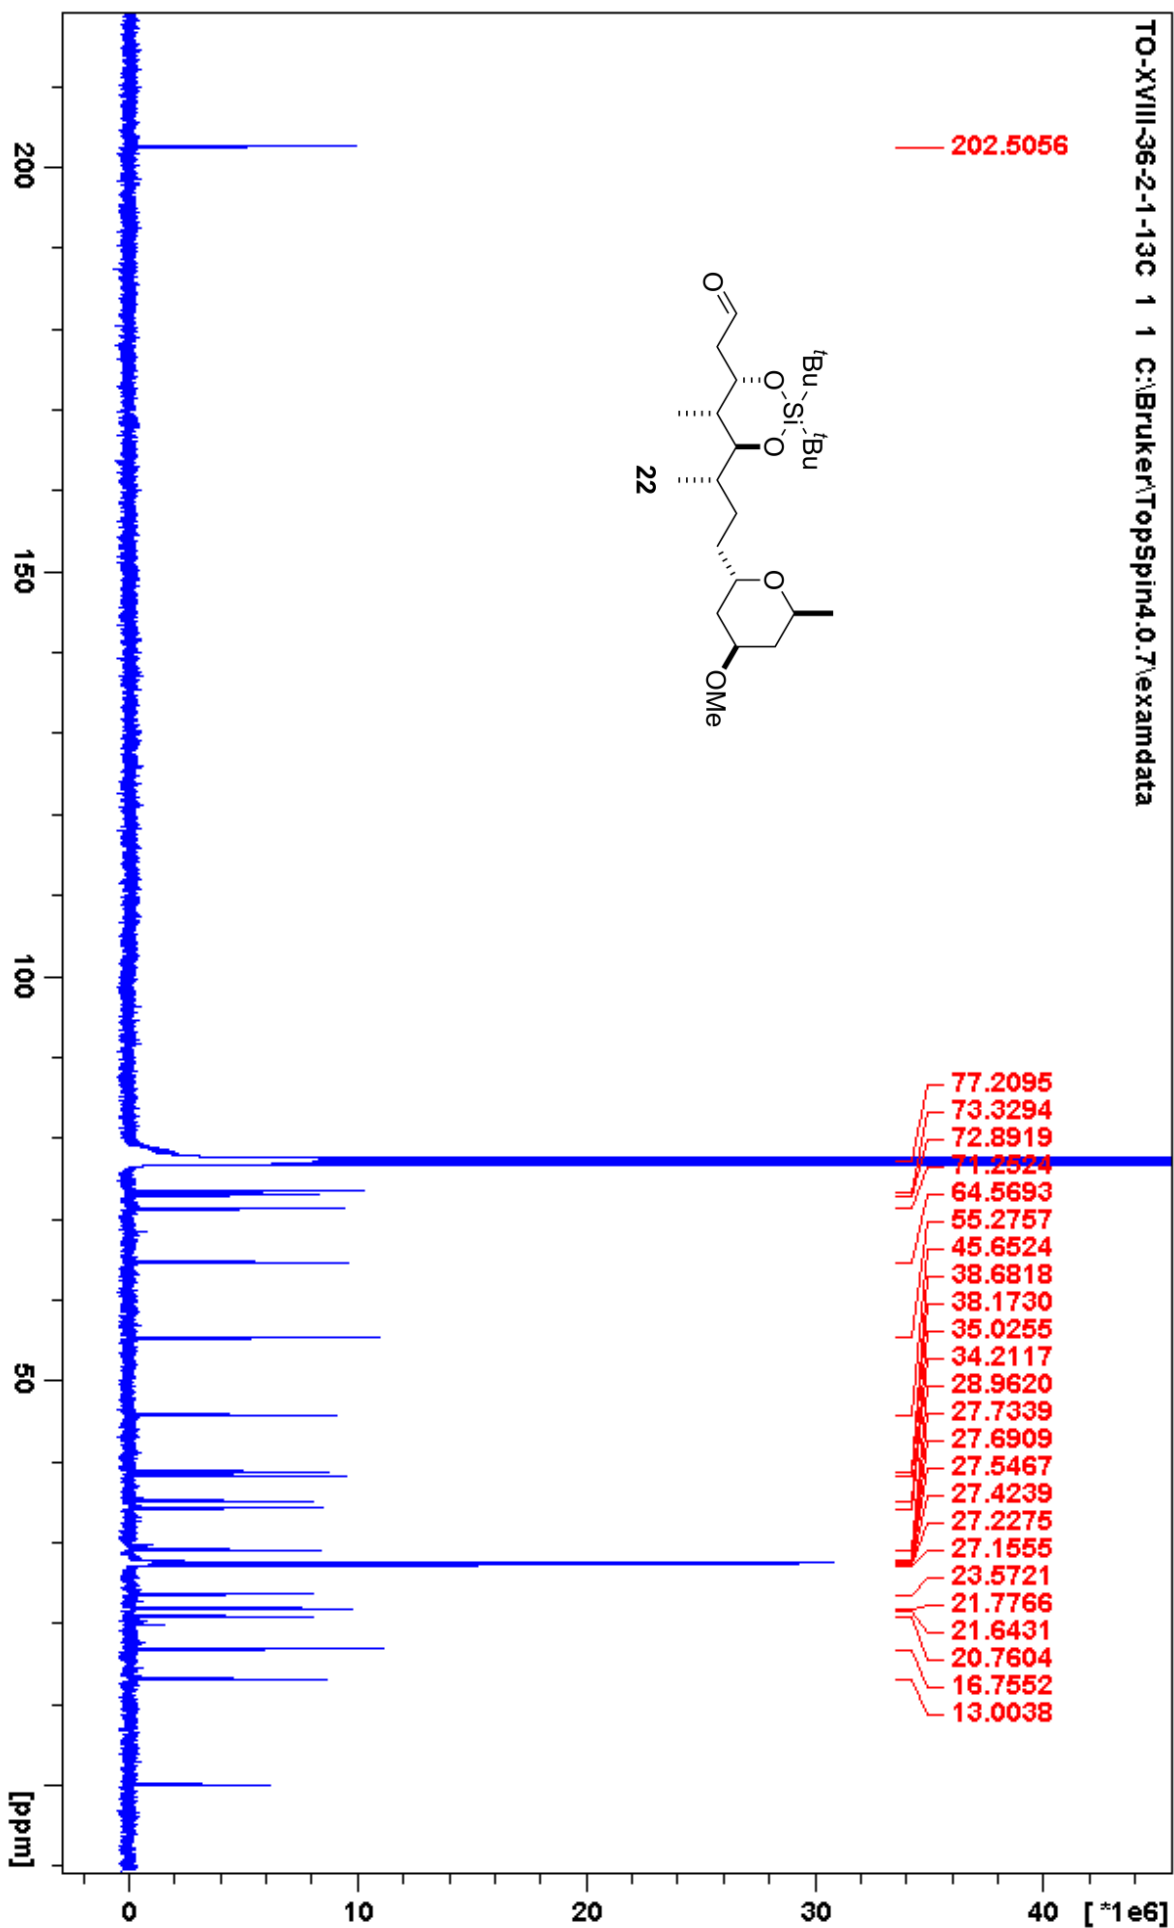

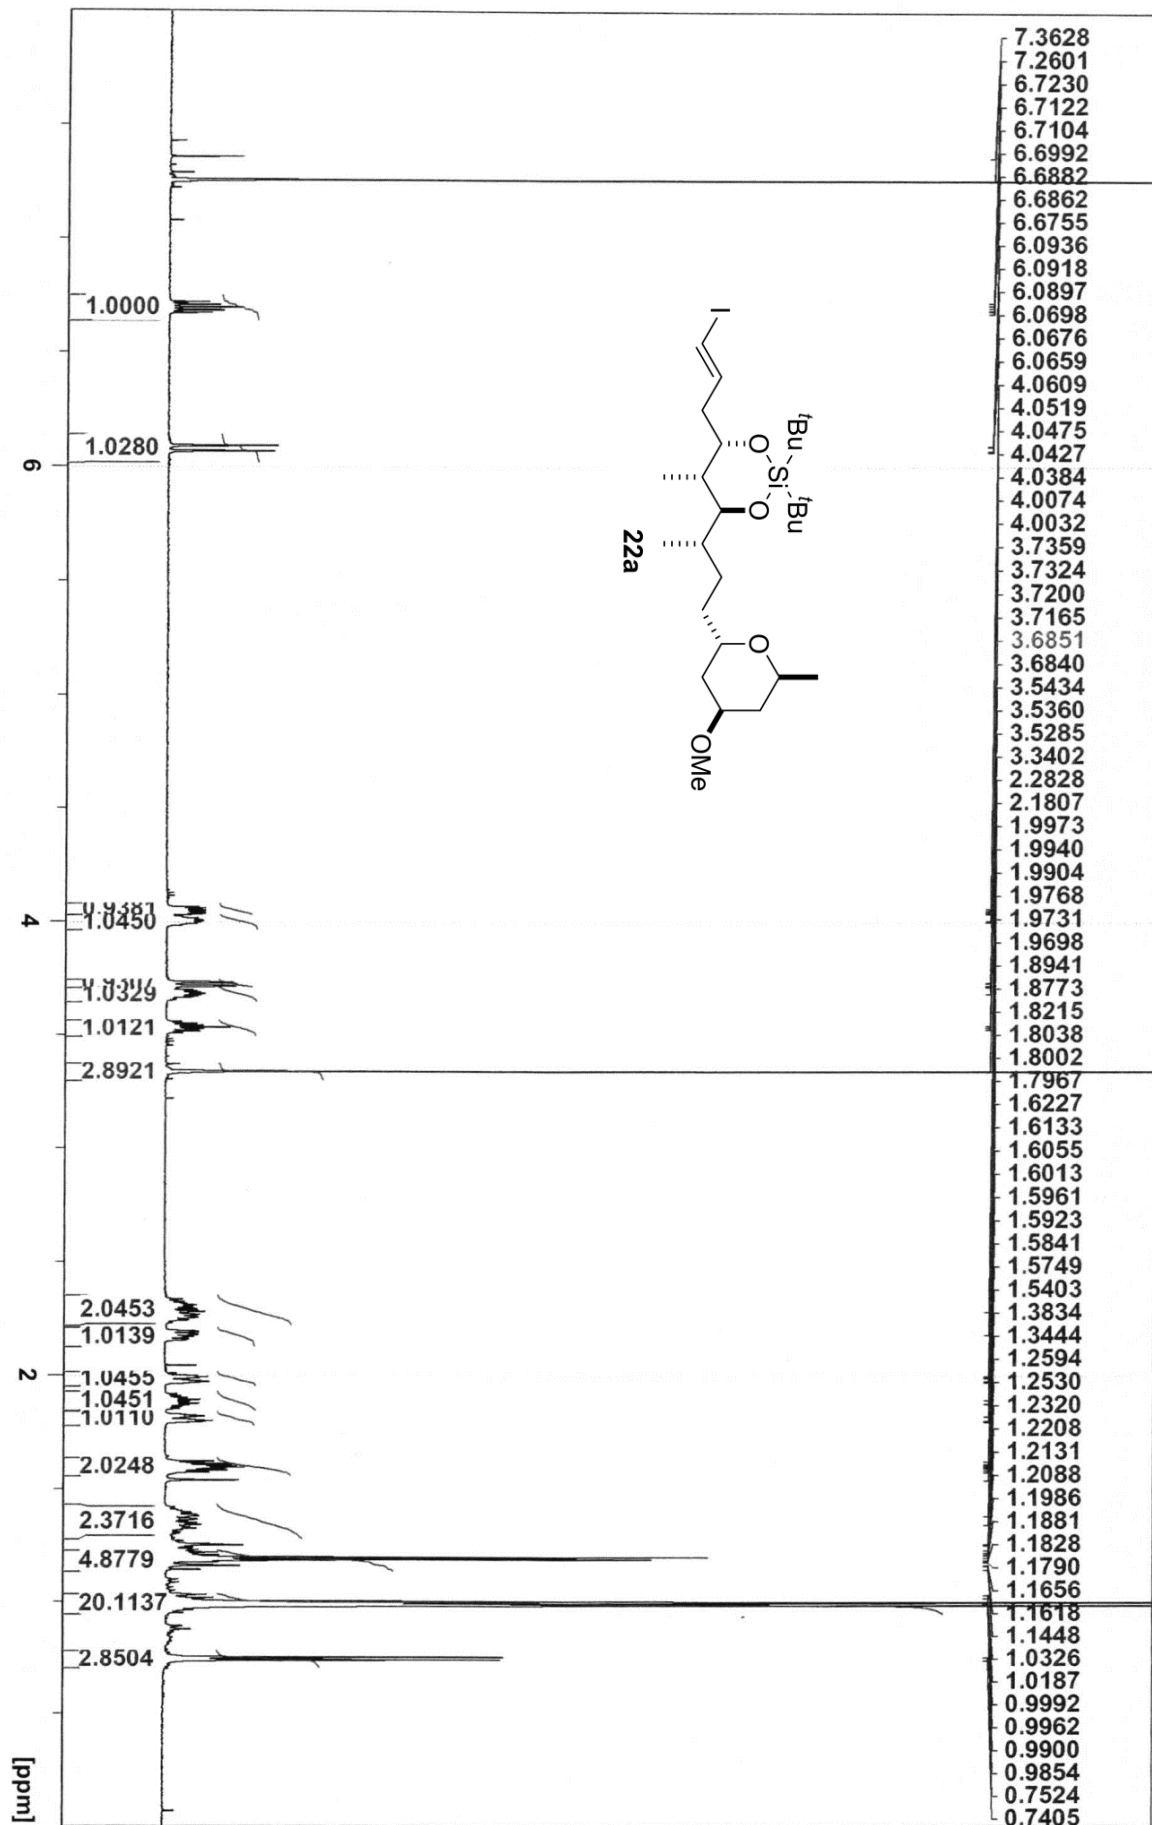

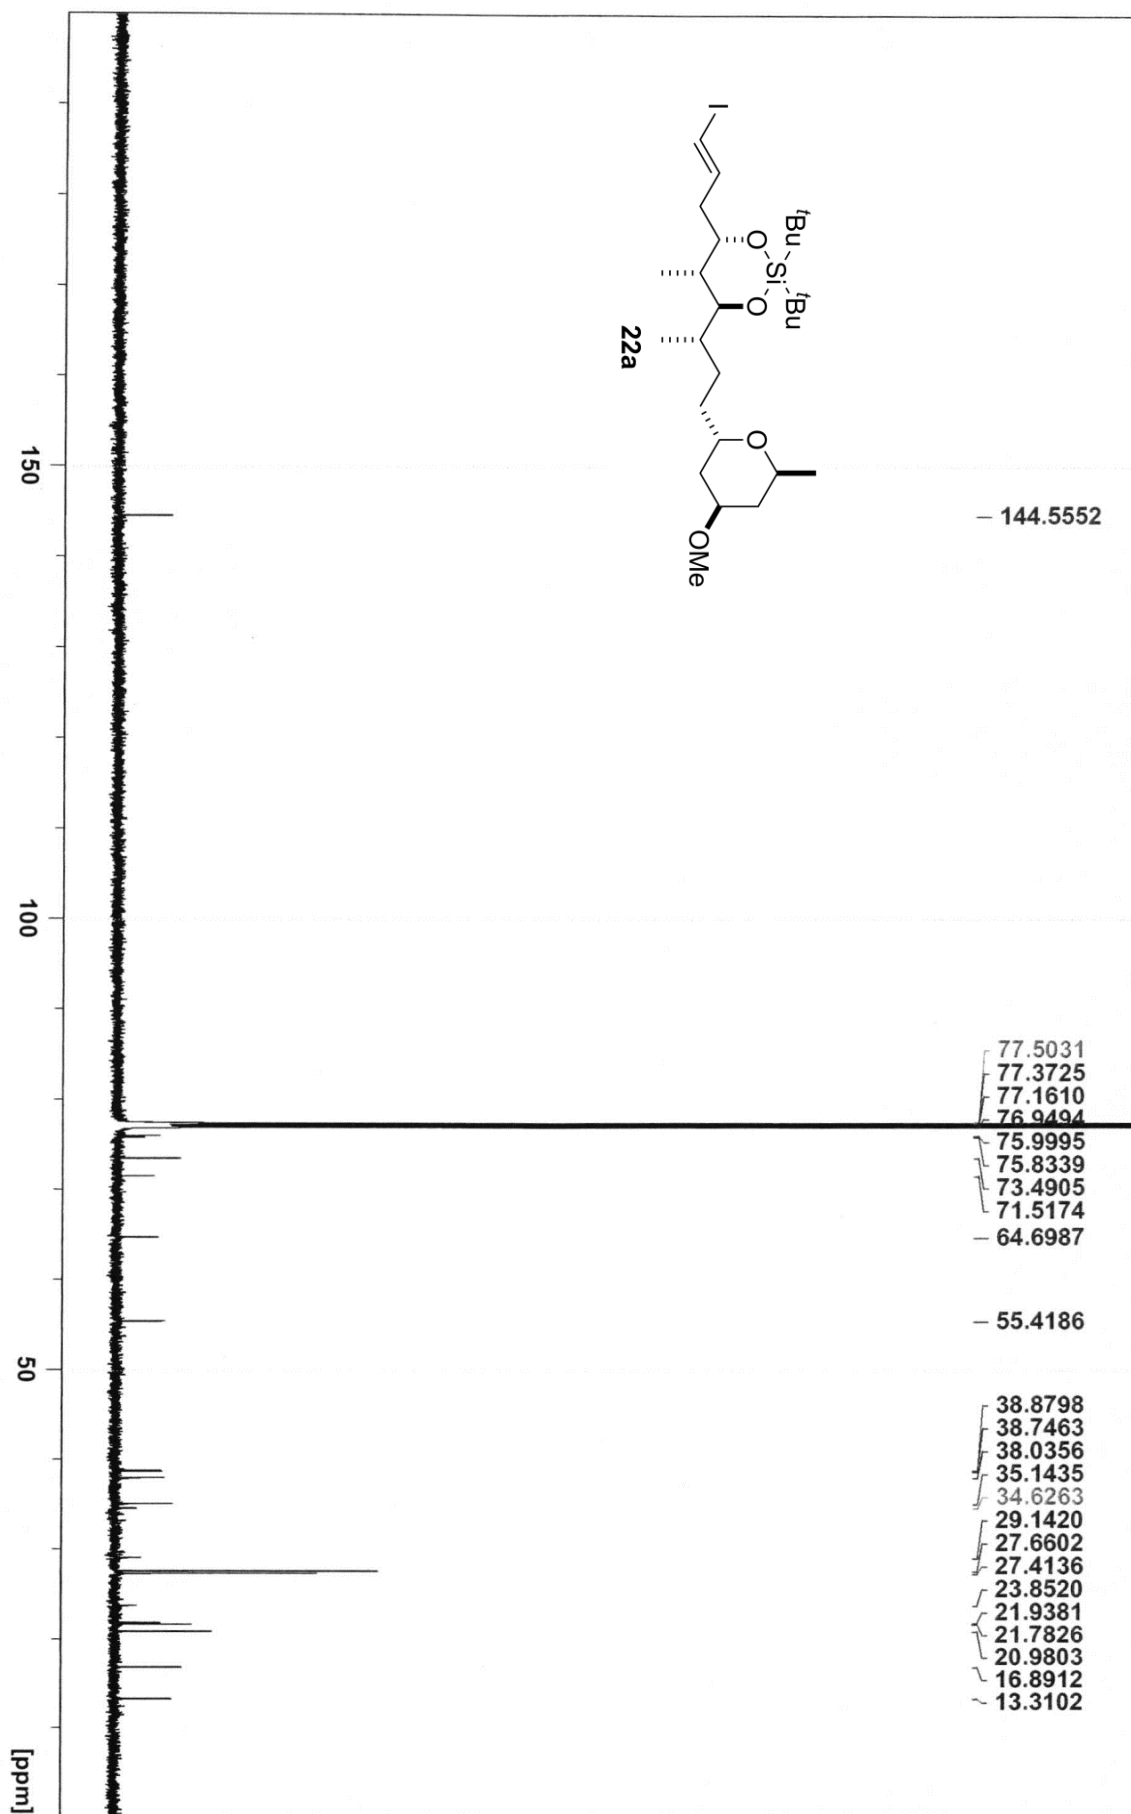

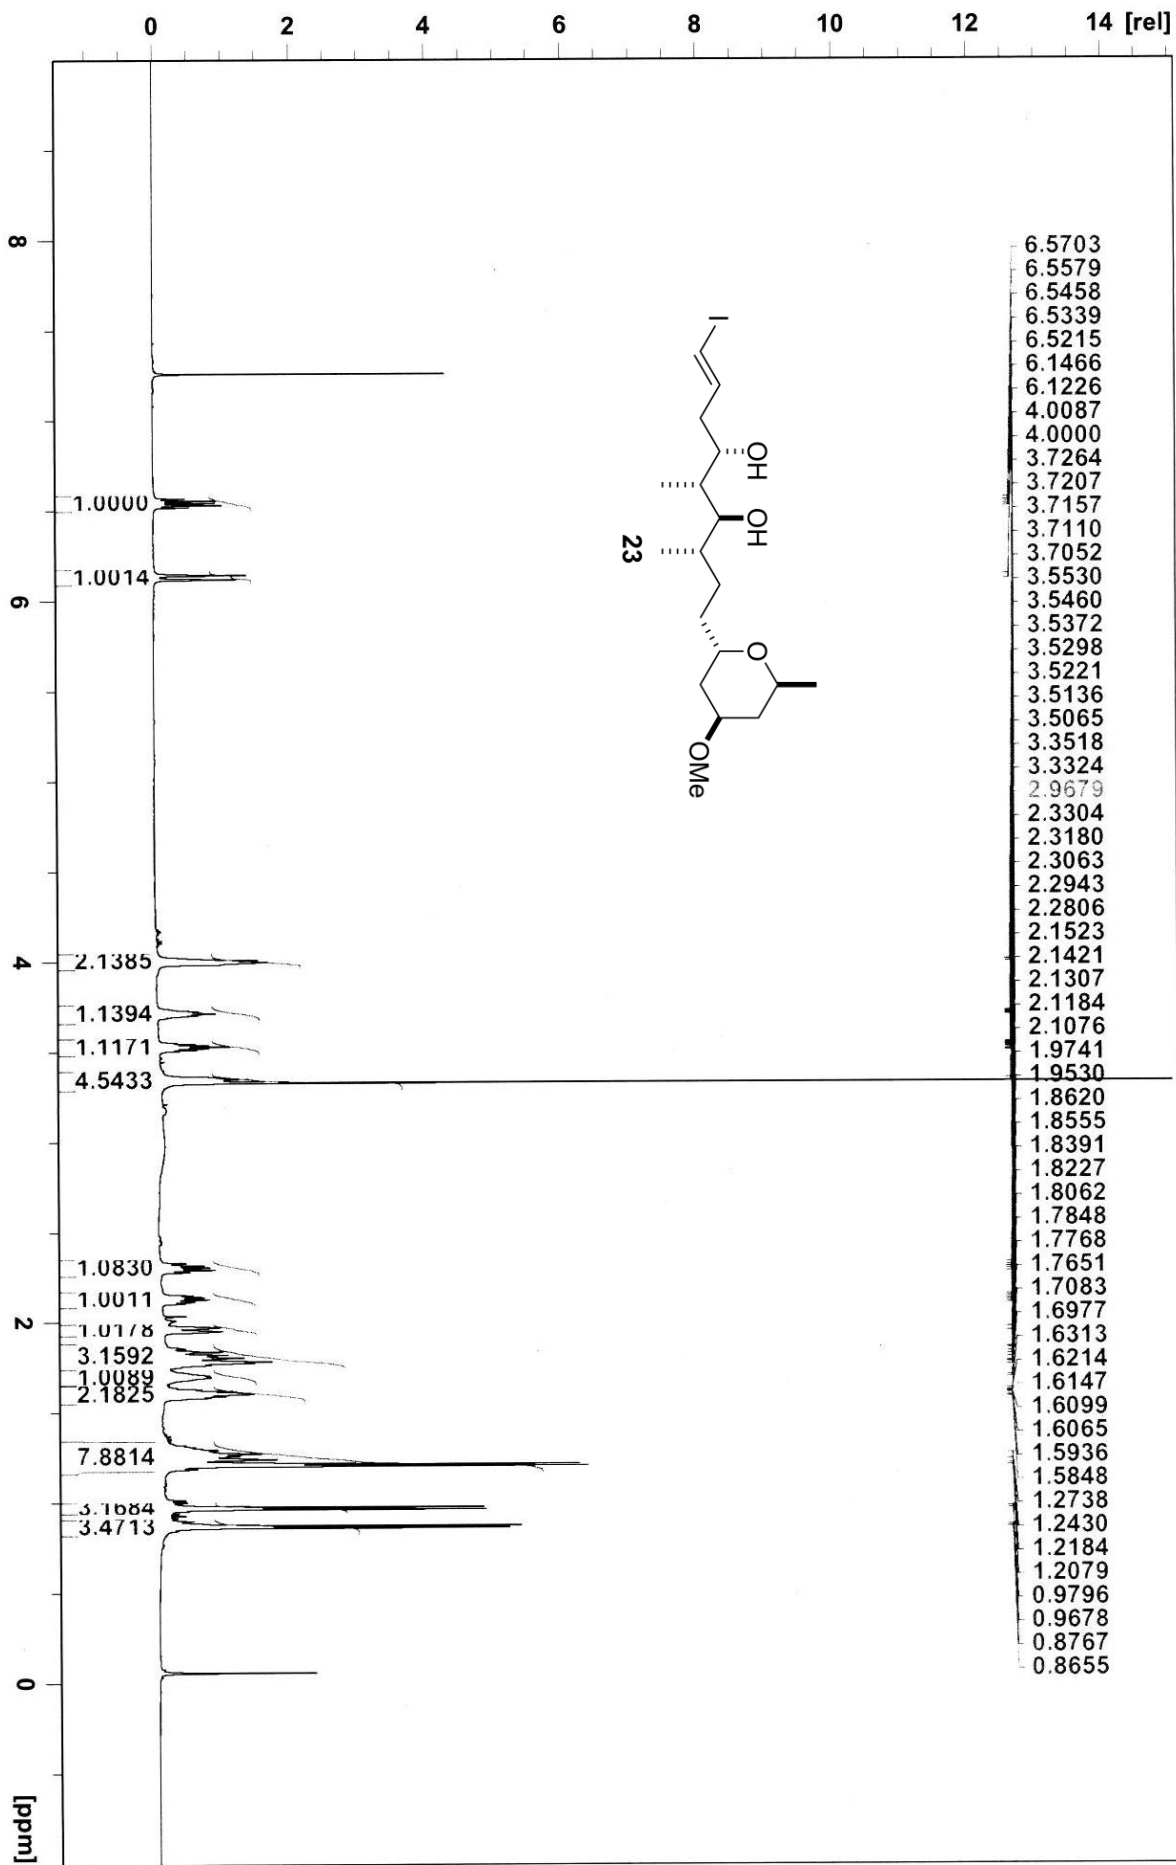



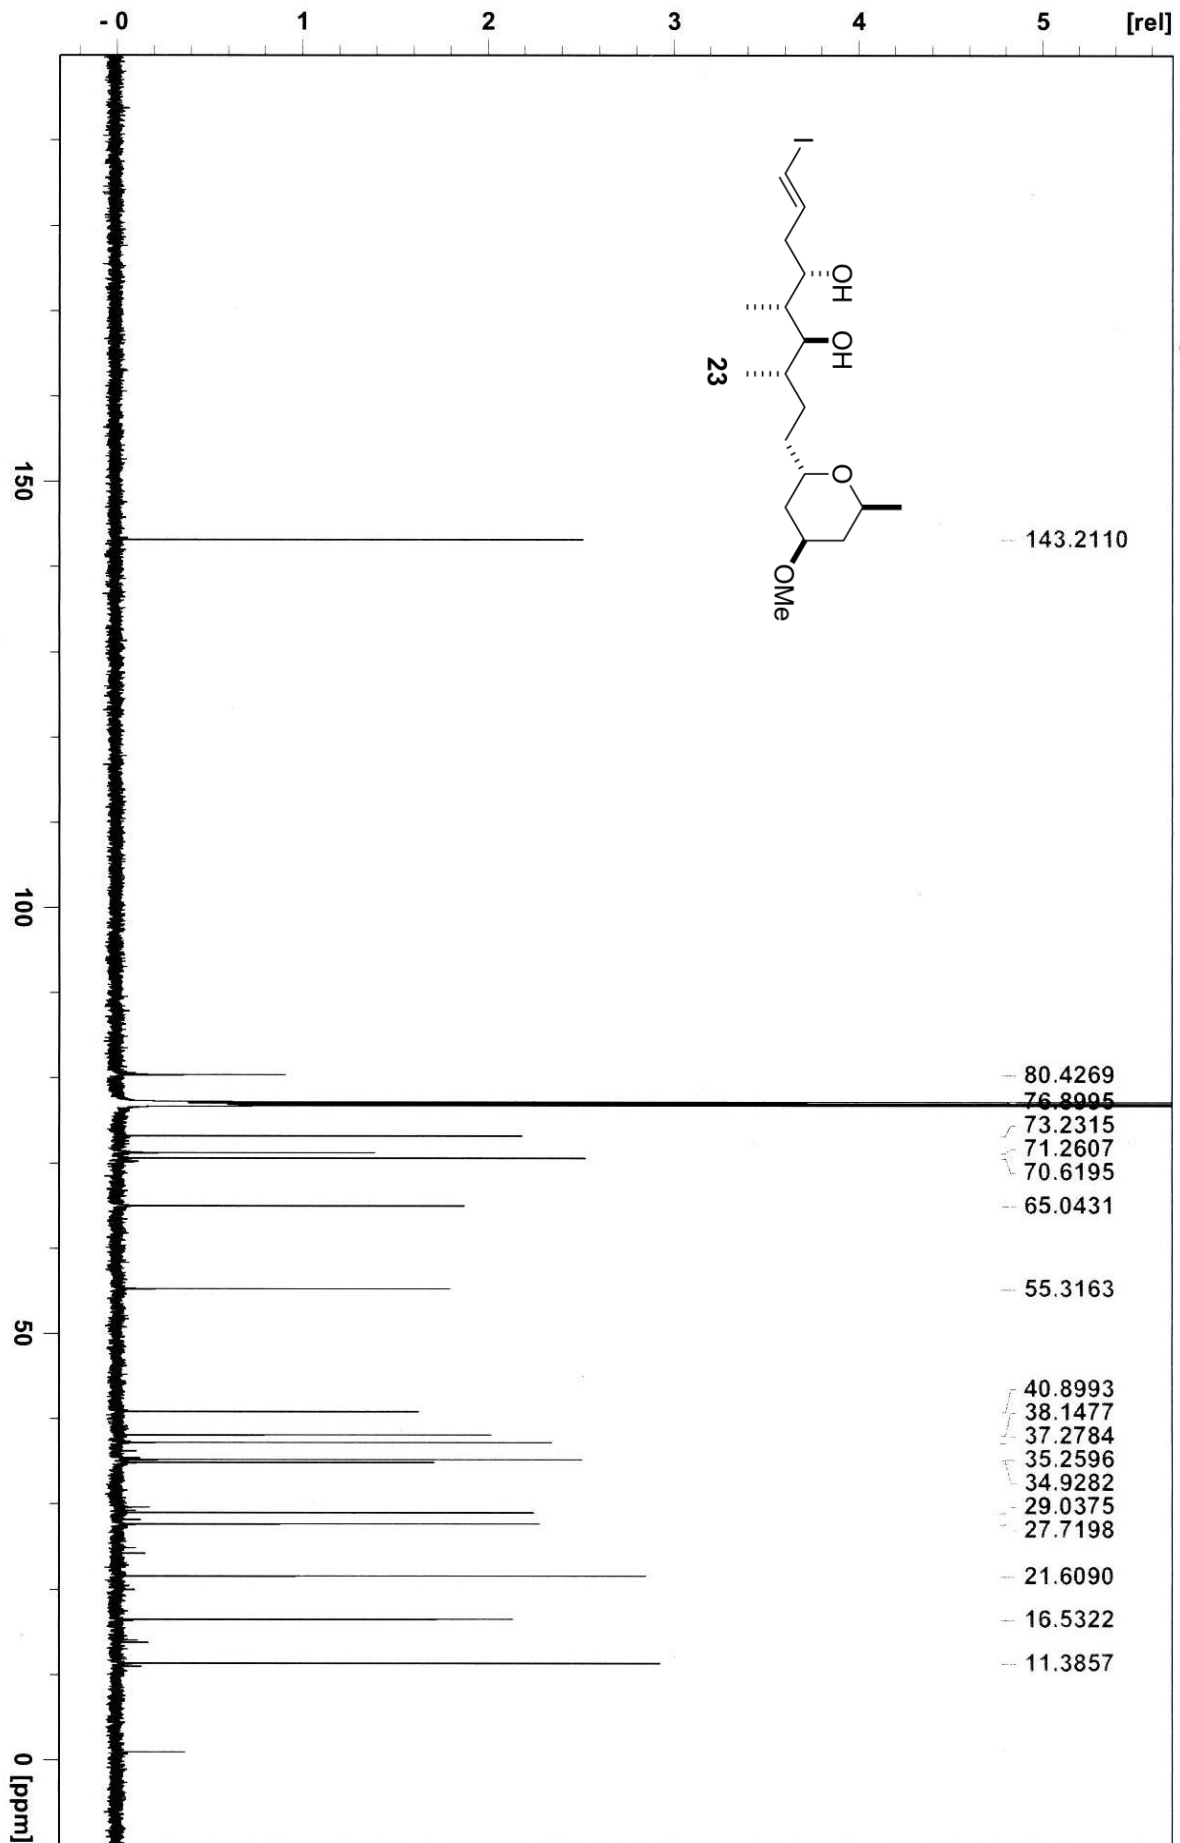

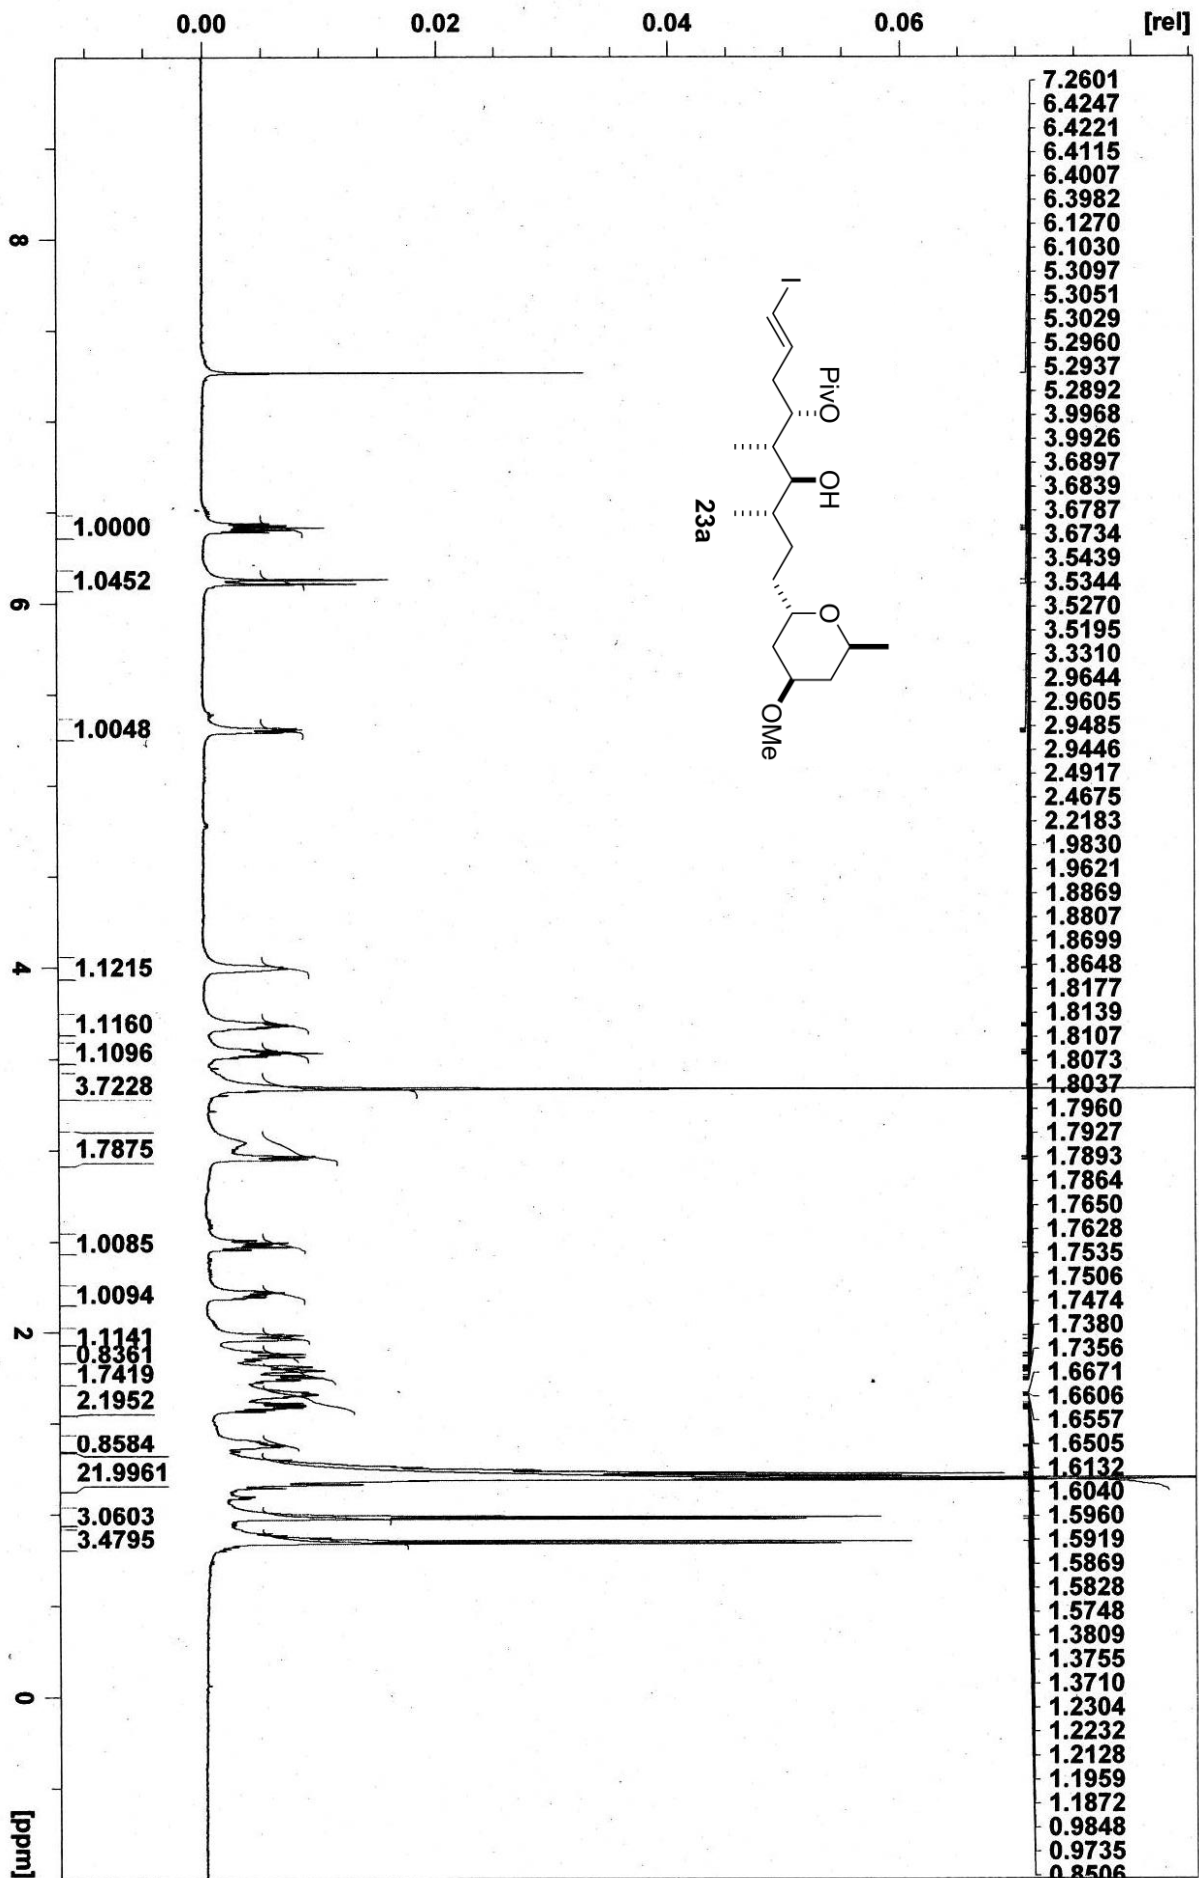

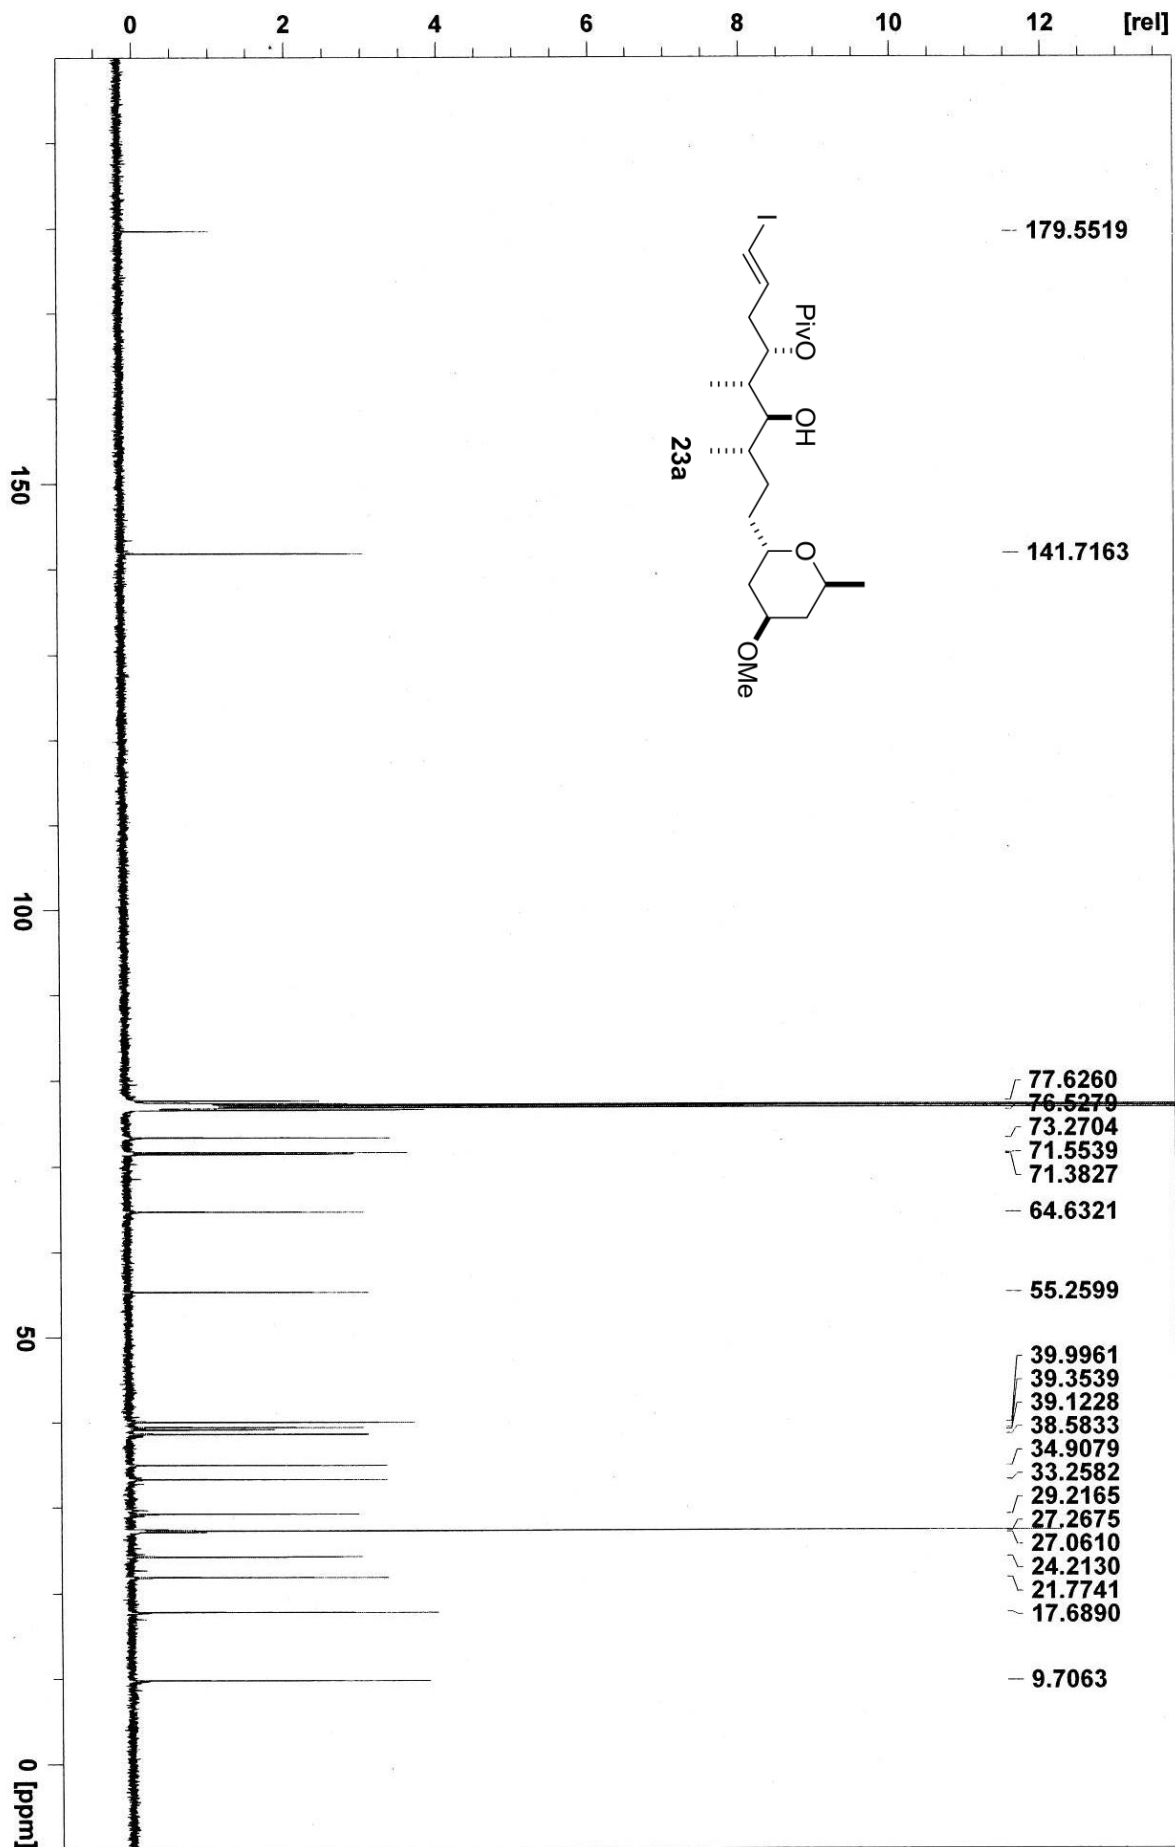

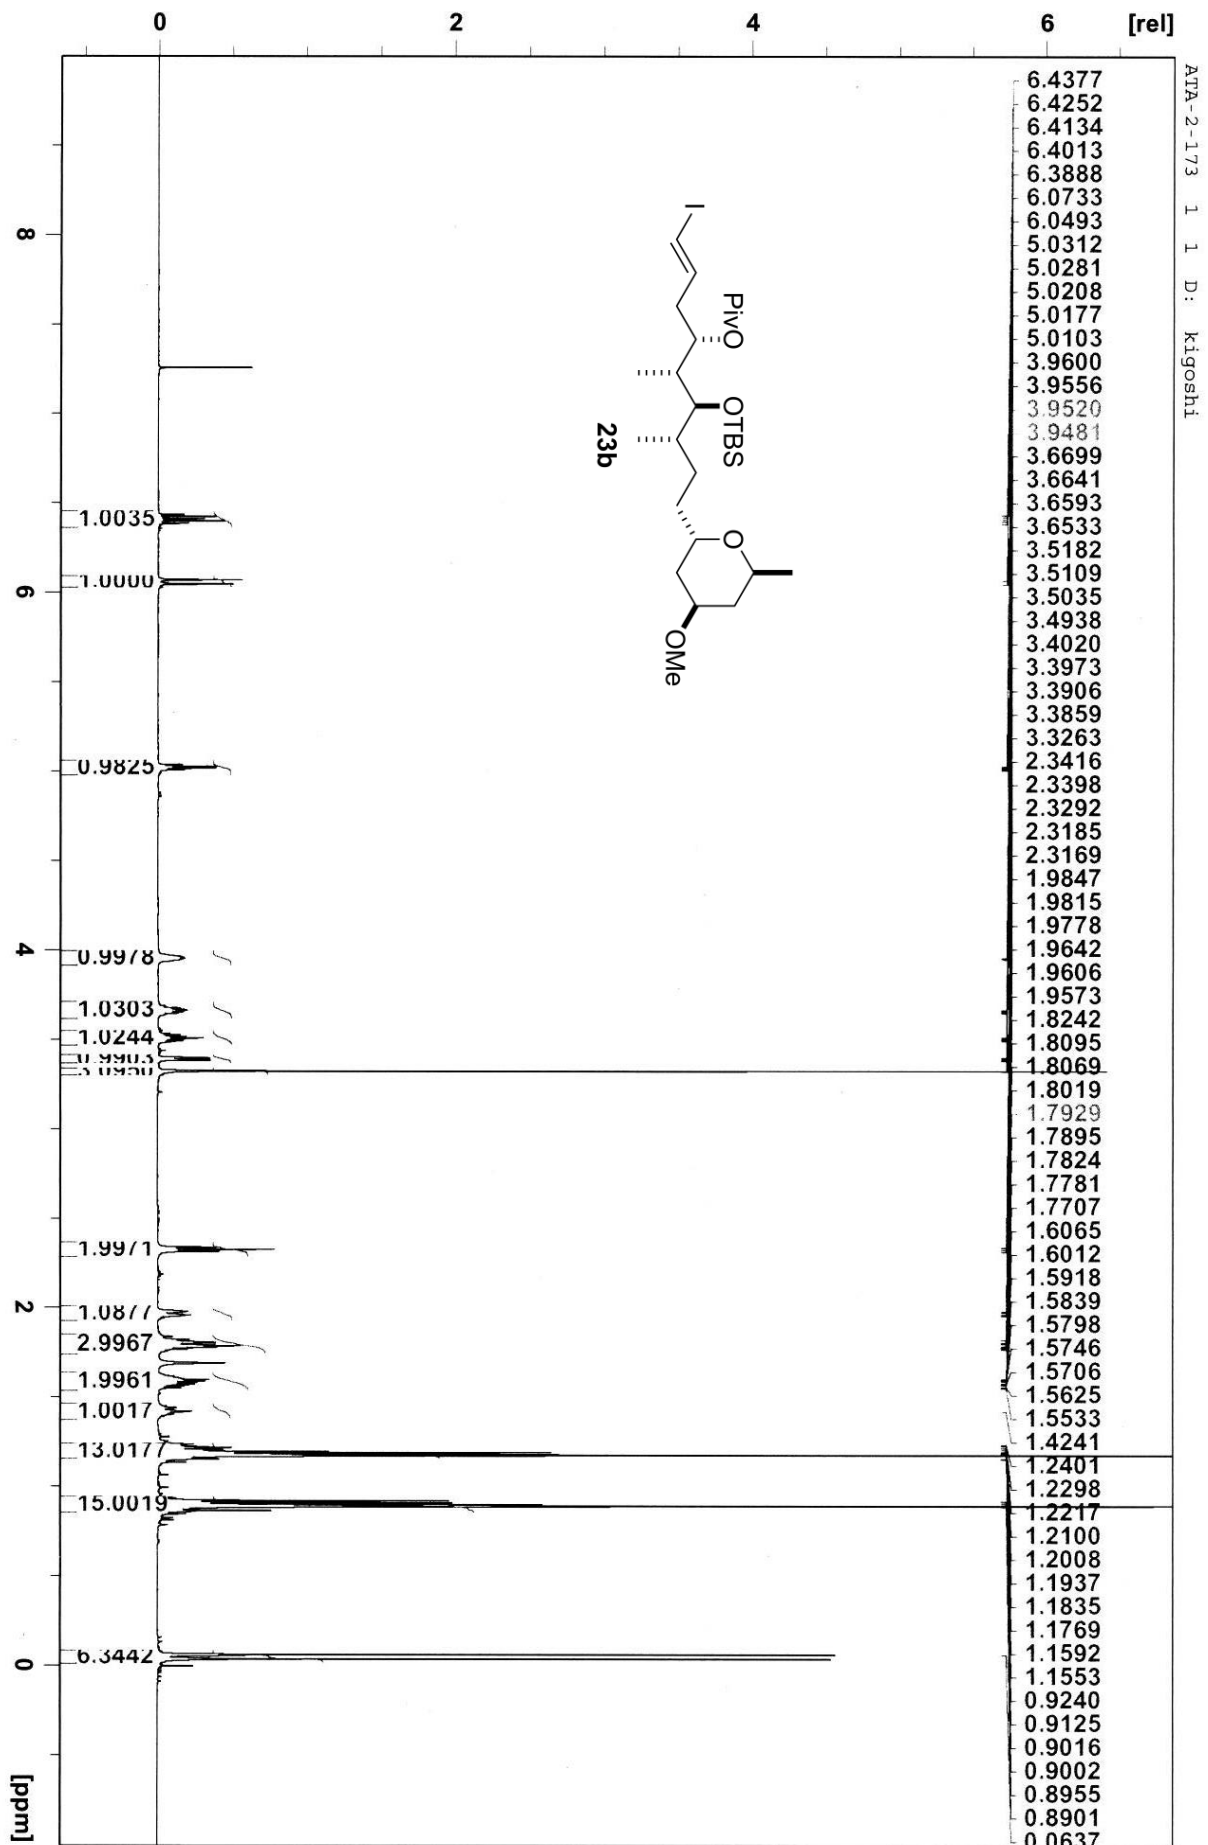

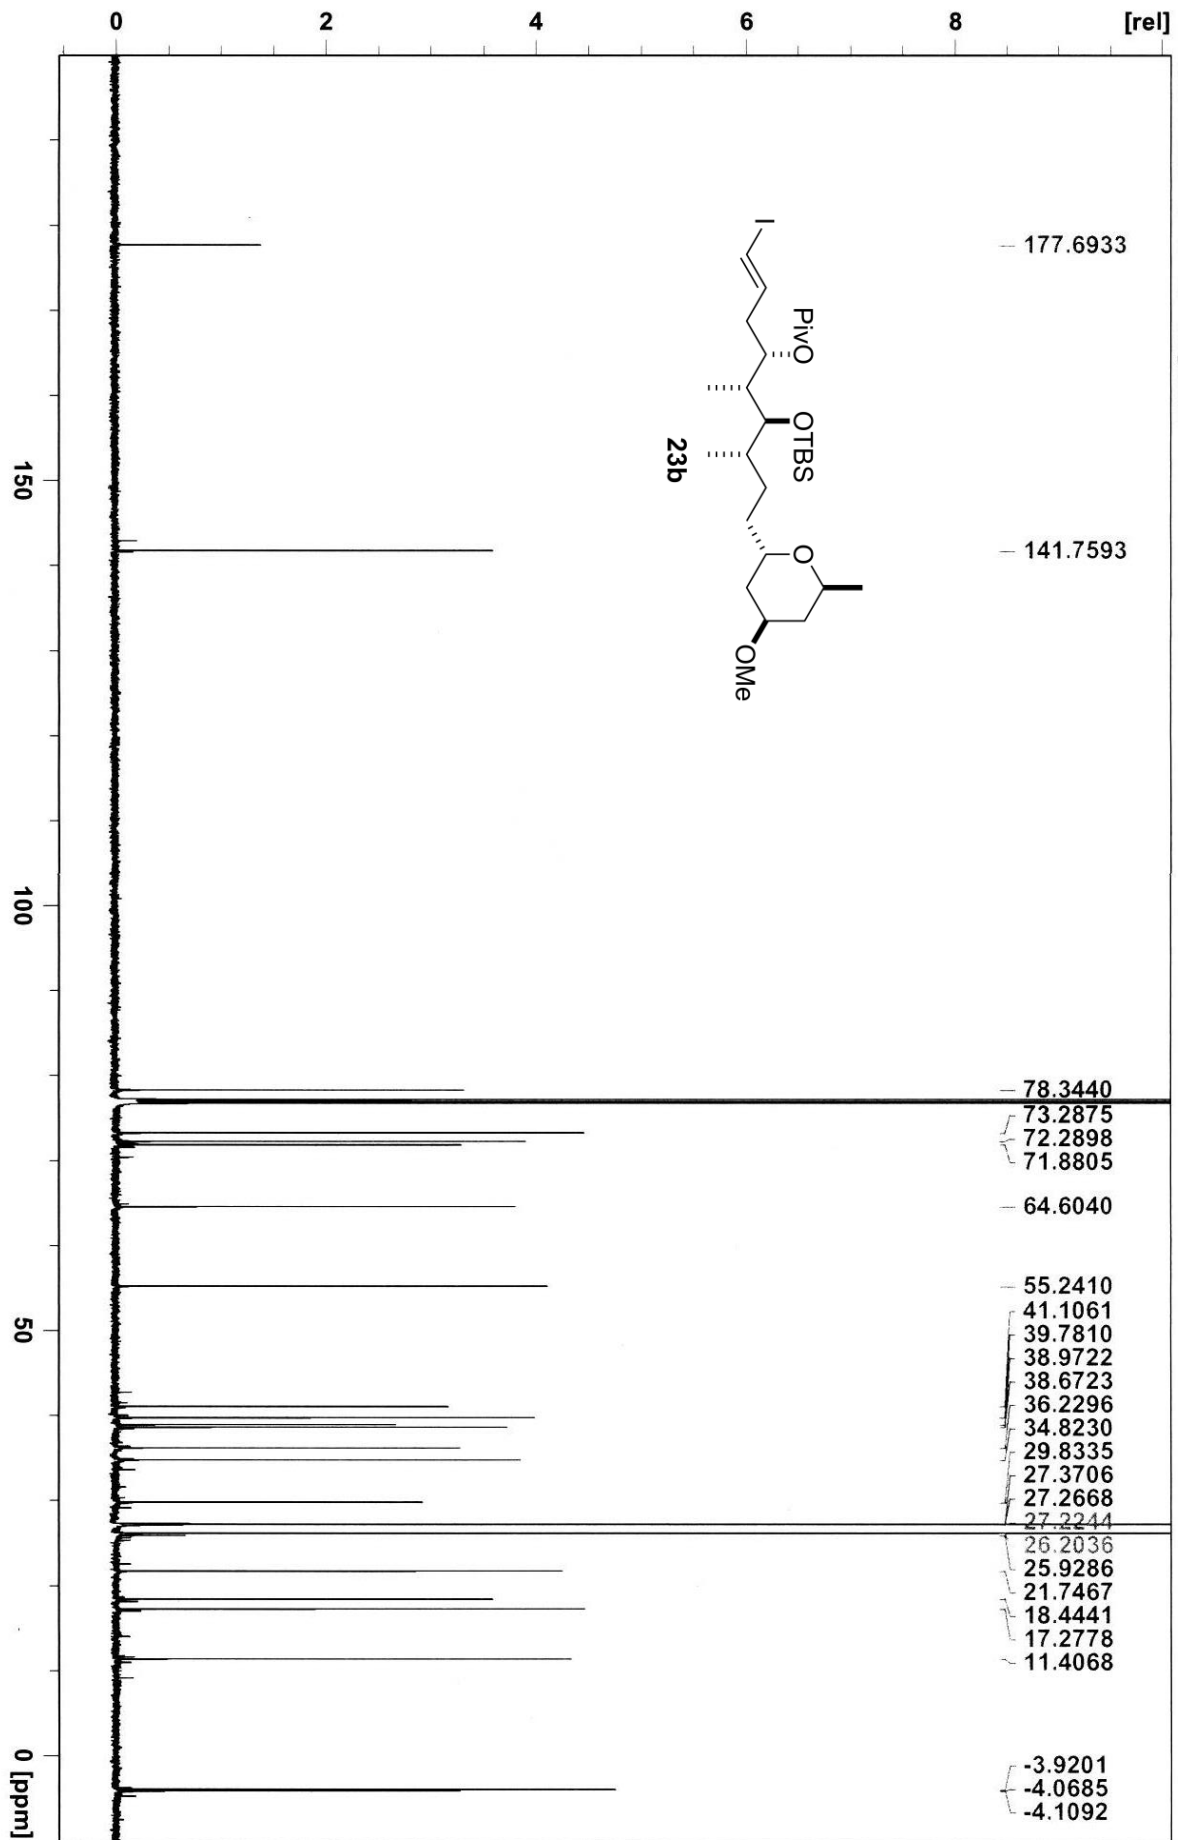

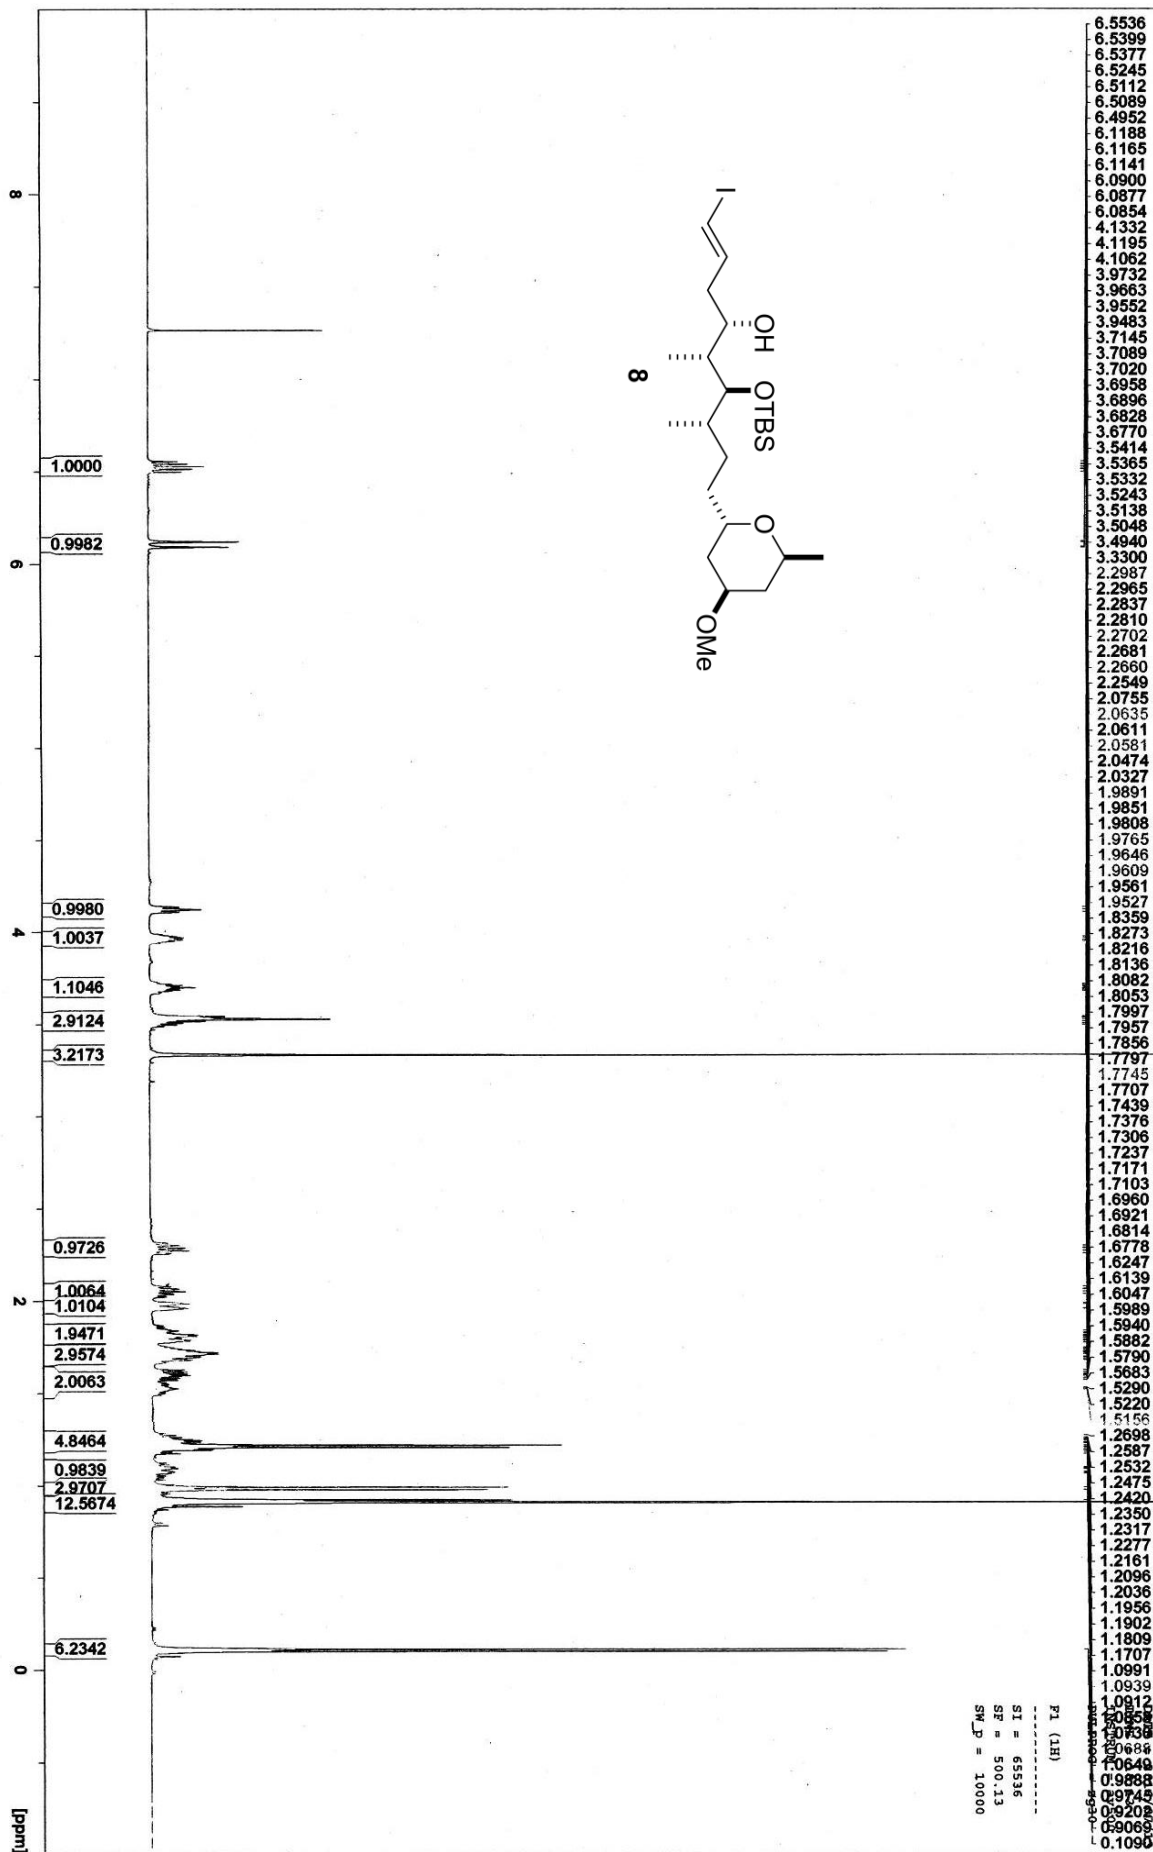

| Chemical Shift (ppm) |
|----------------------|
| 6.5536               |
| 6.5399               |
| 6.5377               |
| 6.5245               |
| 6.5112               |
| 6.5089               |
| 6.4952               |
| 6.1188               |
| 6.1165               |
| 6.1141               |
| 6.0900               |
| 6.0877               |
| 6.0854               |
| 4.1332               |
| 4.1195               |
| 4.1062               |
| 3.9732               |
| 3.9663               |
| 3.9552               |
| 3.9483               |
| 3.7145               |
| 3.7089               |
| 3.7020               |
| 3.6958               |
| 3.6896               |
| 3.6828               |
| 3.6770               |
| 3.5414               |
| 3.5365               |
| 3.5332               |
| 3.5243               |
| 3.5138               |
| 3.5048               |
| 3.4940               |
| 3.3300               |
| 2.2987               |
| 2.2965               |
| 2.2837               |
| 2.2810               |
| 2.2702               |
| 2.2681               |
| 2.2660               |
| 2.2549               |
| 2.0755               |
| 2.0635               |
| 2.0611               |
| 2.0581               |
| 2.0474               |
| 2.0327               |
| 1.9891               |
| 1.9851               |
| 1.9808               |
| 1.9765               |
| 1.9646               |
| 1.9609               |
| 1.9561               |
| 1.9527               |
| 1.8359               |
| 1.8273               |
| 1.8216               |
| 1.8136               |
| 1.8082               |
| 1.8053               |
| 1.7997               |
| 1.7957               |
| 1.7856               |
| 1.7797               |
| 1.7745               |
| 1.7707               |
| 1.7439               |
| 1.7376               |
| 1.7306               |
| 1.7237               |
| 1.7171               |
| 1.7103               |
| 1.6960               |
| 1.6921               |
| 1.6814               |
| 1.6778               |
| 1.6247               |
| 1.6139               |
| 1.6047               |
| 1.5989               |
| 1.5940               |
| 1.5882               |
| 1.5790               |
| 1.5683               |
| 1.5290               |
| 1.5220               |
| 1.5156               |
| 1.2698               |
| 1.2587               |
| 1.2532               |
| 1.2475               |
| 1.2420               |
| 1.2350               |
| 1.2317               |
| 1.2277               |
| 1.2161               |
| 1.2096               |
| 1.2036               |
| 1.1956               |
| 1.1902               |
| 1.1809               |
| 1.1707               |
| 1.0991               |
| 1.0939               |
| 1.0912               |
| 1.0858               |
| 1.0738               |
| 1.0688               |
| 1.0640               |
| 0.9888               |
| 0.9745               |
| 0.9202               |
| 0.9068               |
| 0.1096               |

PI (H)  
SI = 65536  
SF = 500.13  
SW\_P = 10000

General

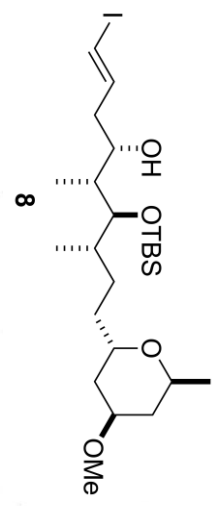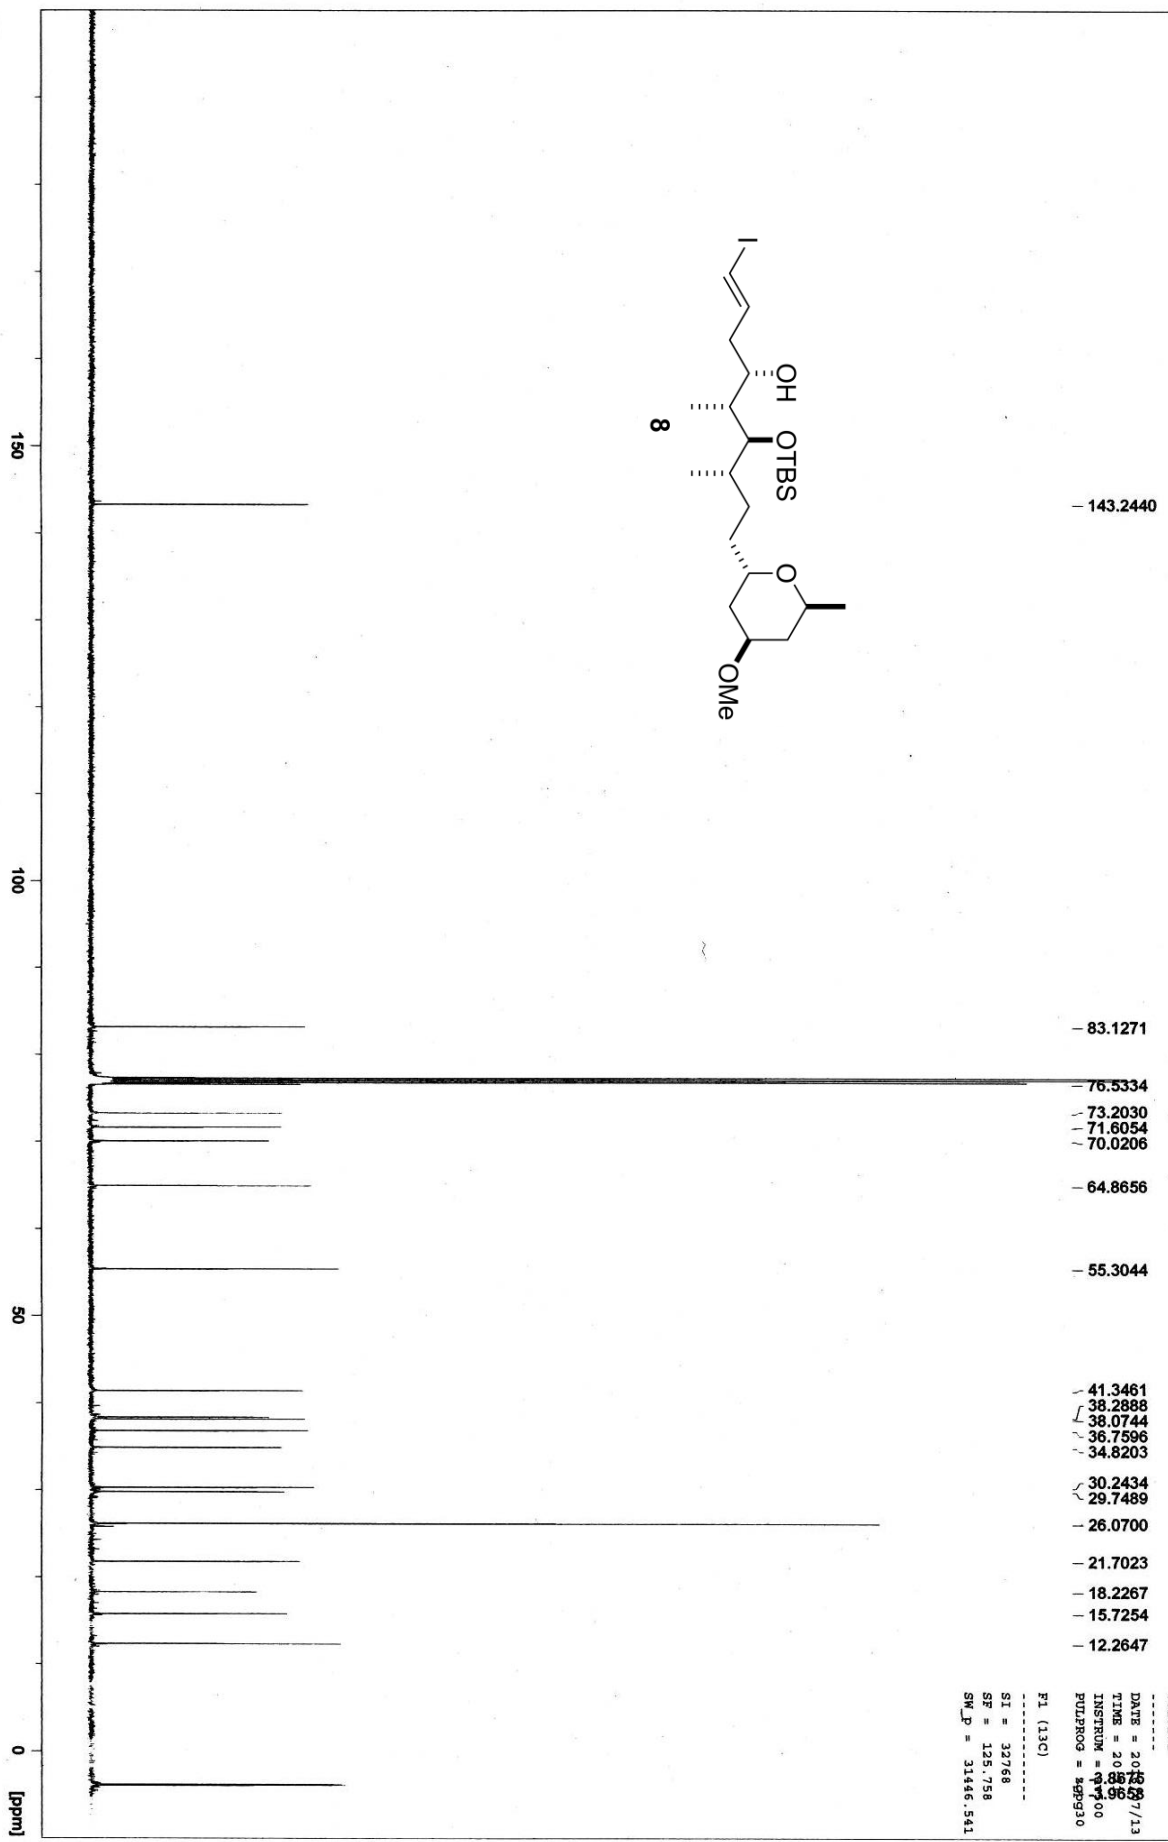

General  
-----  
DATE = 2016/7/13  
TIME = 20:55:00  
INSTRUM = JNM-PMX00  
PULPROG = zgpg30  
F1 (13C)  
-----  
SI = 32768  
SF = 125.758  
SW\_P = 31446.541

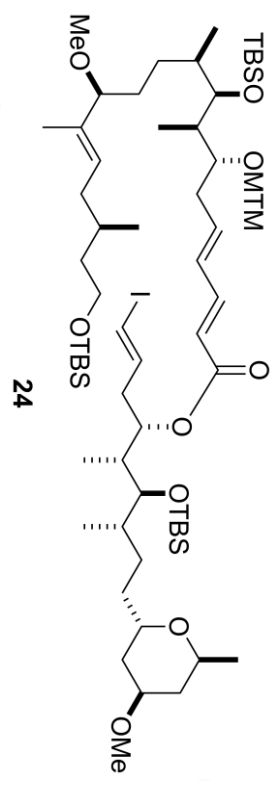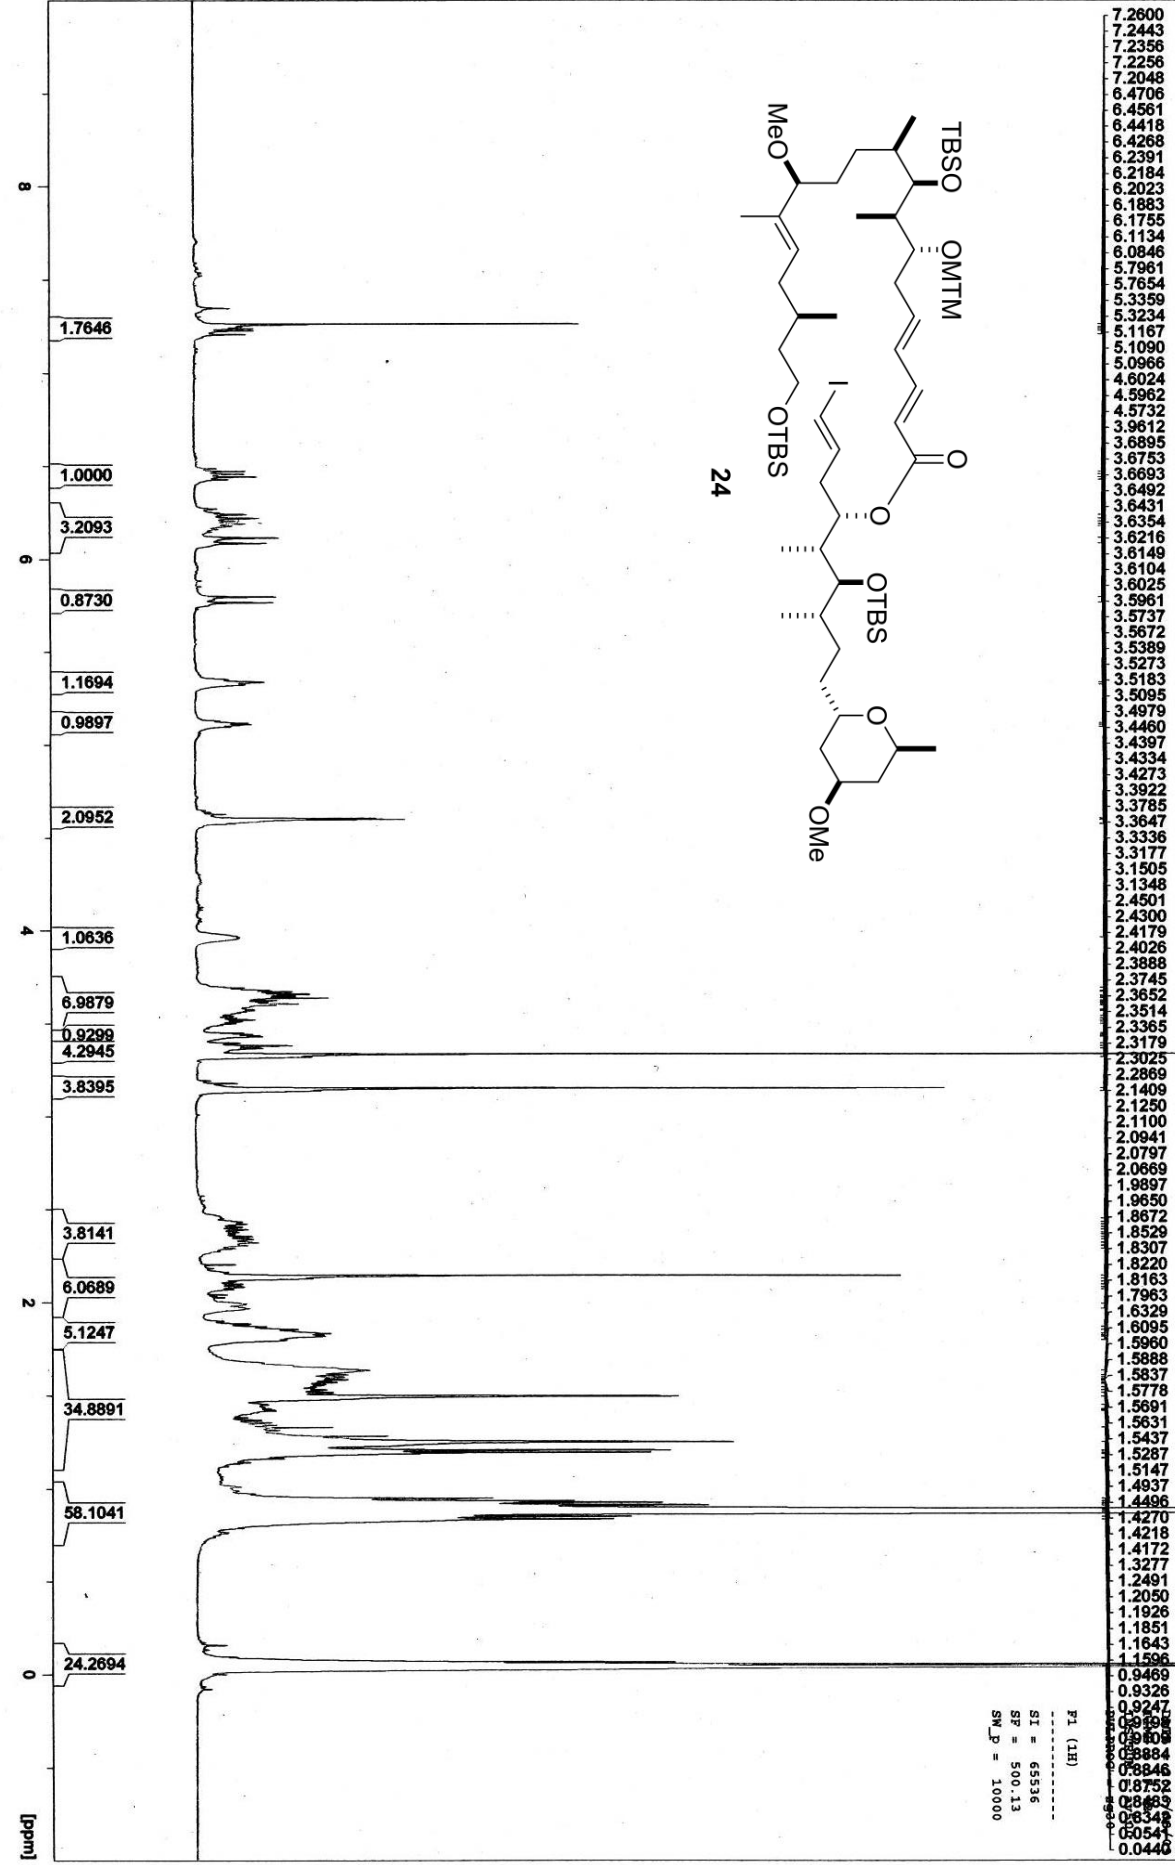

F1 (1H)  
 SI = 6536  
 SF = 500.13  
 SM\_P = 10000

General



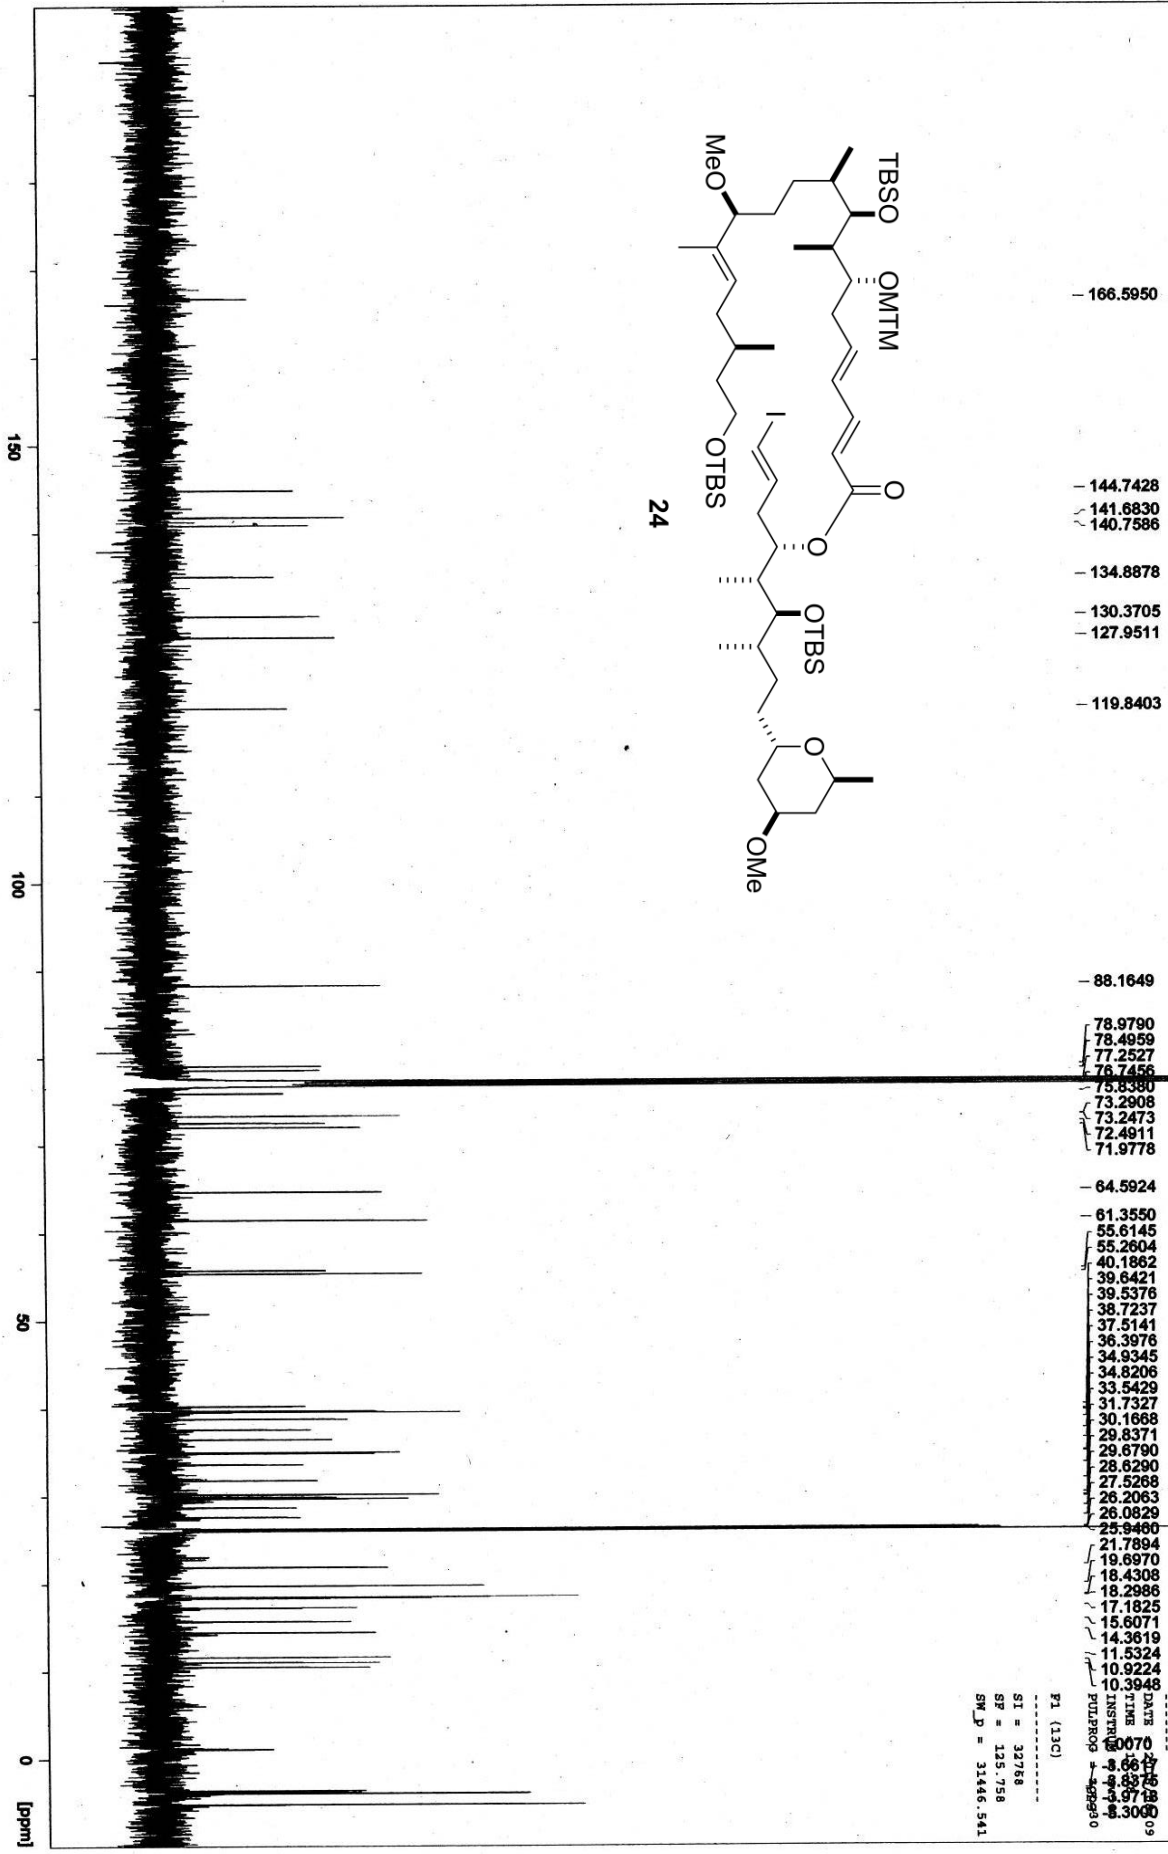

|            |
|------------|
| - 166.5950 |
| - 144.7428 |
| - 141.6830 |
| - 140.7586 |
| - 134.8878 |
| - 130.3705 |
| - 127.9511 |
| - 119.8403 |
| - 88.1649  |
| 78.9790    |
| 78.4959    |
| 77.2527    |
| 76.7456    |
| 75.8380    |
| 73.2908    |
| 73.2473    |
| 72.4911    |
| 71.9778    |
| - 64.5924  |
| - 61.3550  |
| 55.6145    |
| 55.2604    |
| 40.1862    |
| 39.6421    |
| 39.5376    |
| 38.7237    |
| 37.5141    |
| 36.3976    |
| 34.9345    |
| 34.8206    |
| 33.5429    |
| 31.7327    |
| 30.1668    |
| 29.8371    |
| 29.6790    |
| 28.6290    |
| 27.5268    |
| 26.2063    |
| 26.0829    |
| 25.9460    |
| 21.7894    |
| 19.6970    |
| 18.4308    |
| 18.2986    |
| 17.1825    |
| 15.6071    |
| 14.3619    |
| 11.5324    |
| 10.9224    |
| 10.3948    |

General  
 DATE 20160809  
 TIME 11:07:18  
 INSTRUM spect  
 PULPROG zgpg30  
 F1 (13C)  
 SI = 32768  
 SF = 125.758  
 SM.P = 31446.541

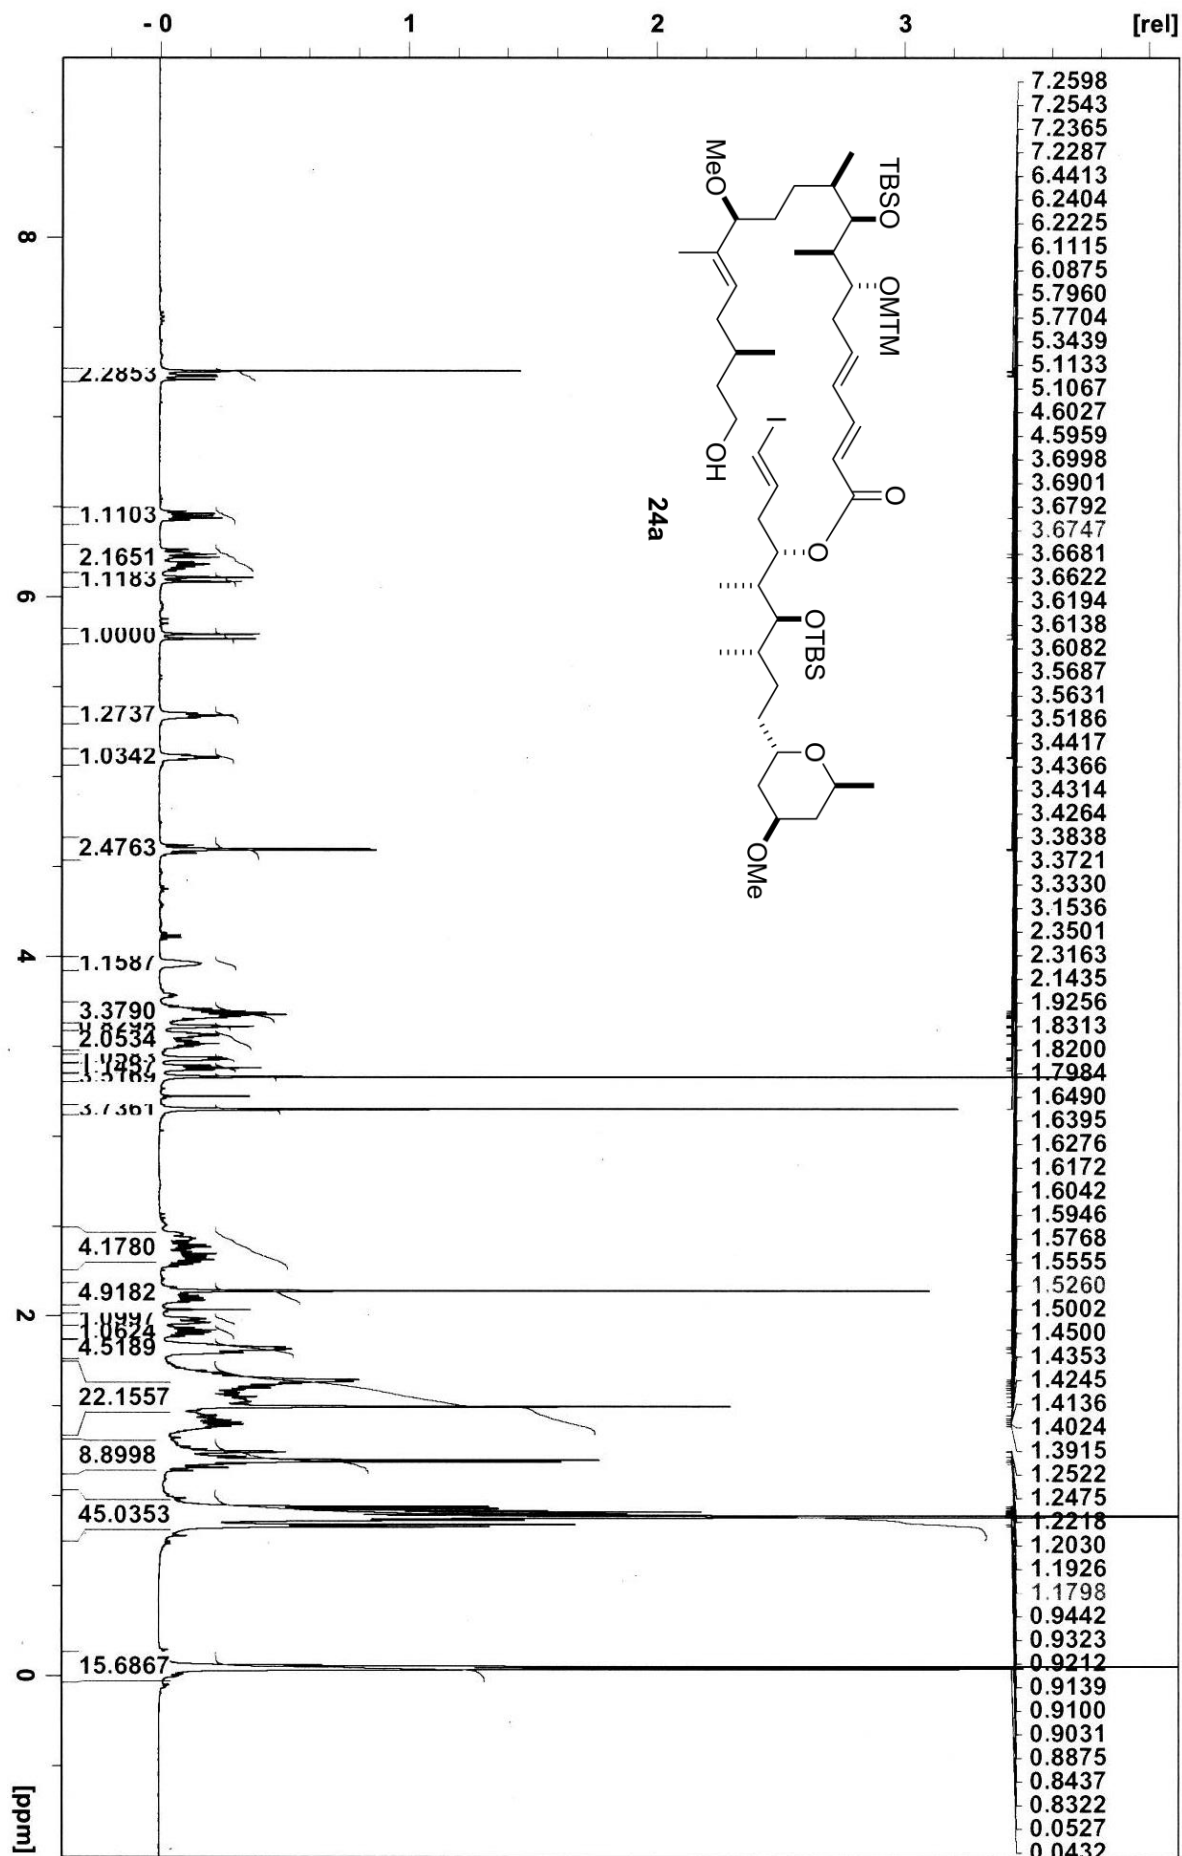

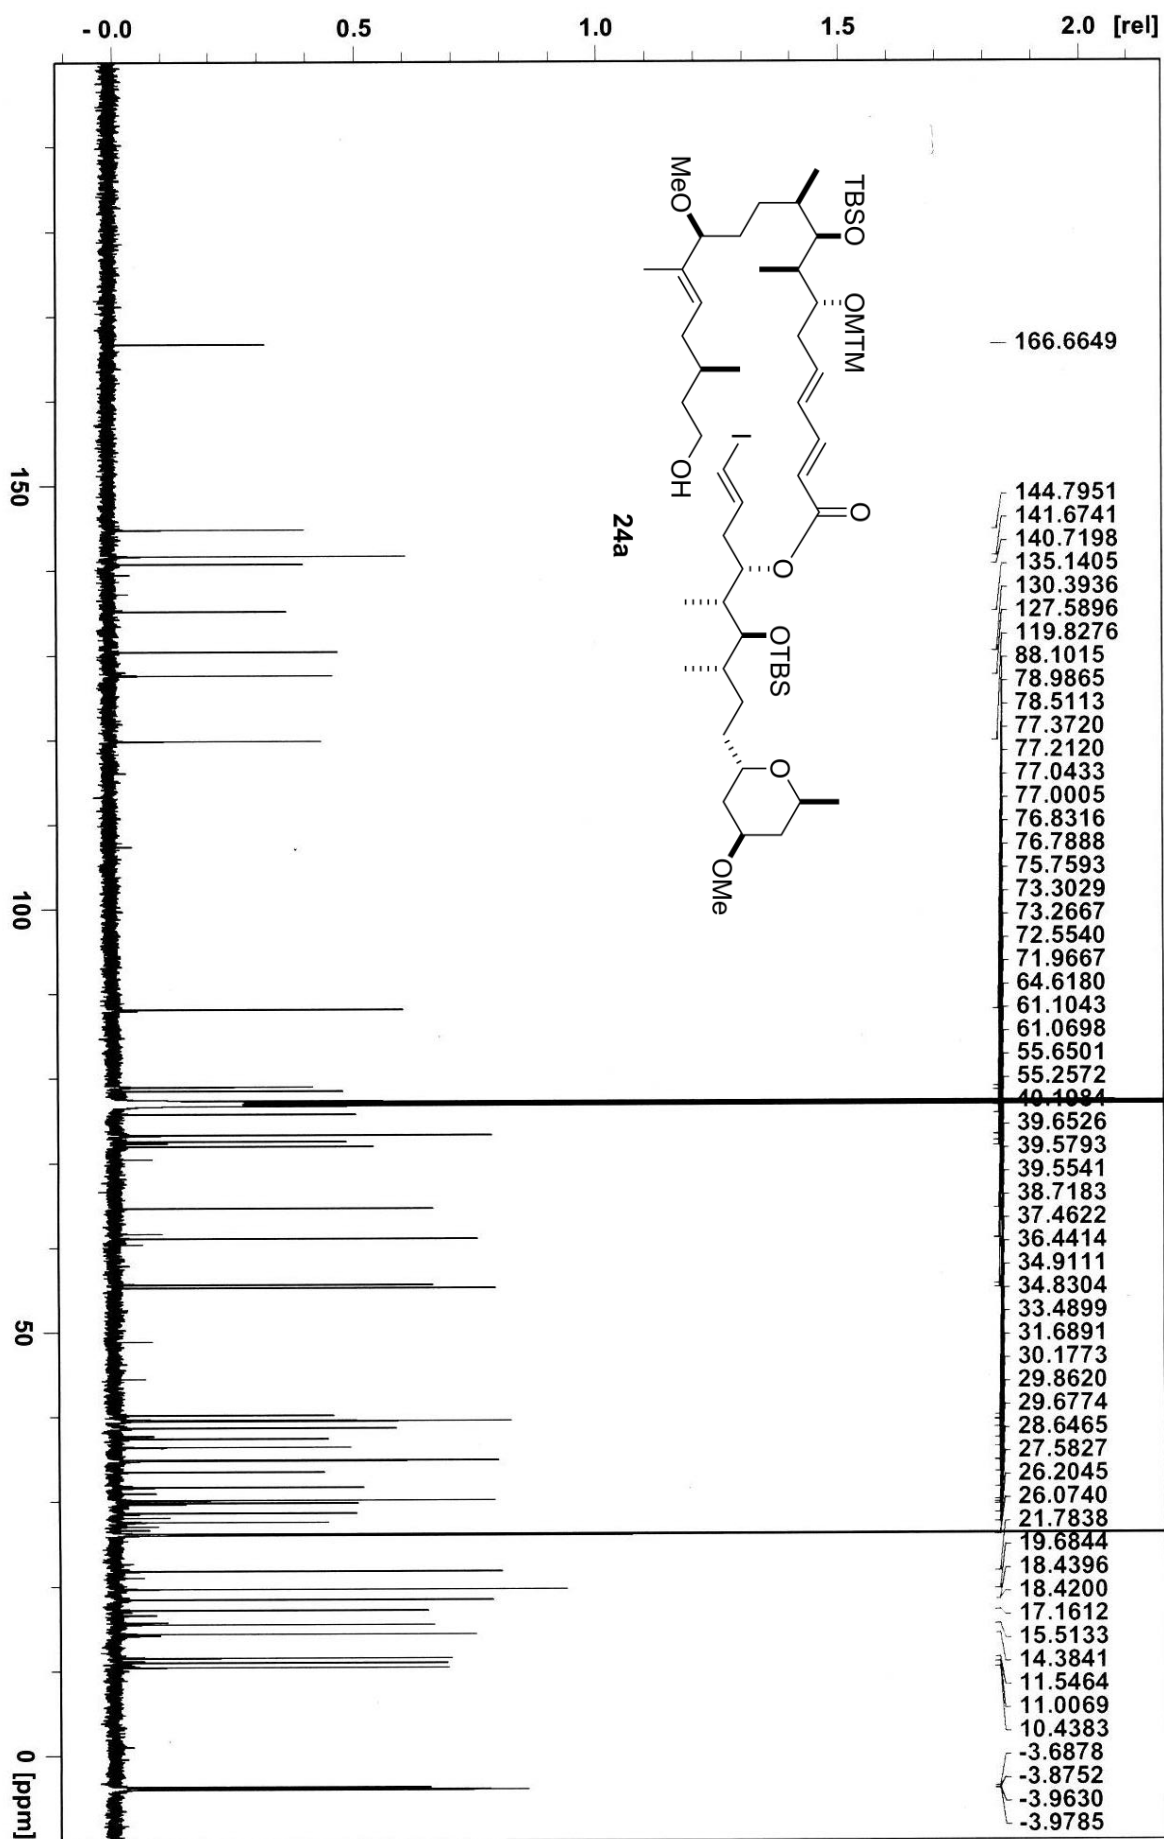

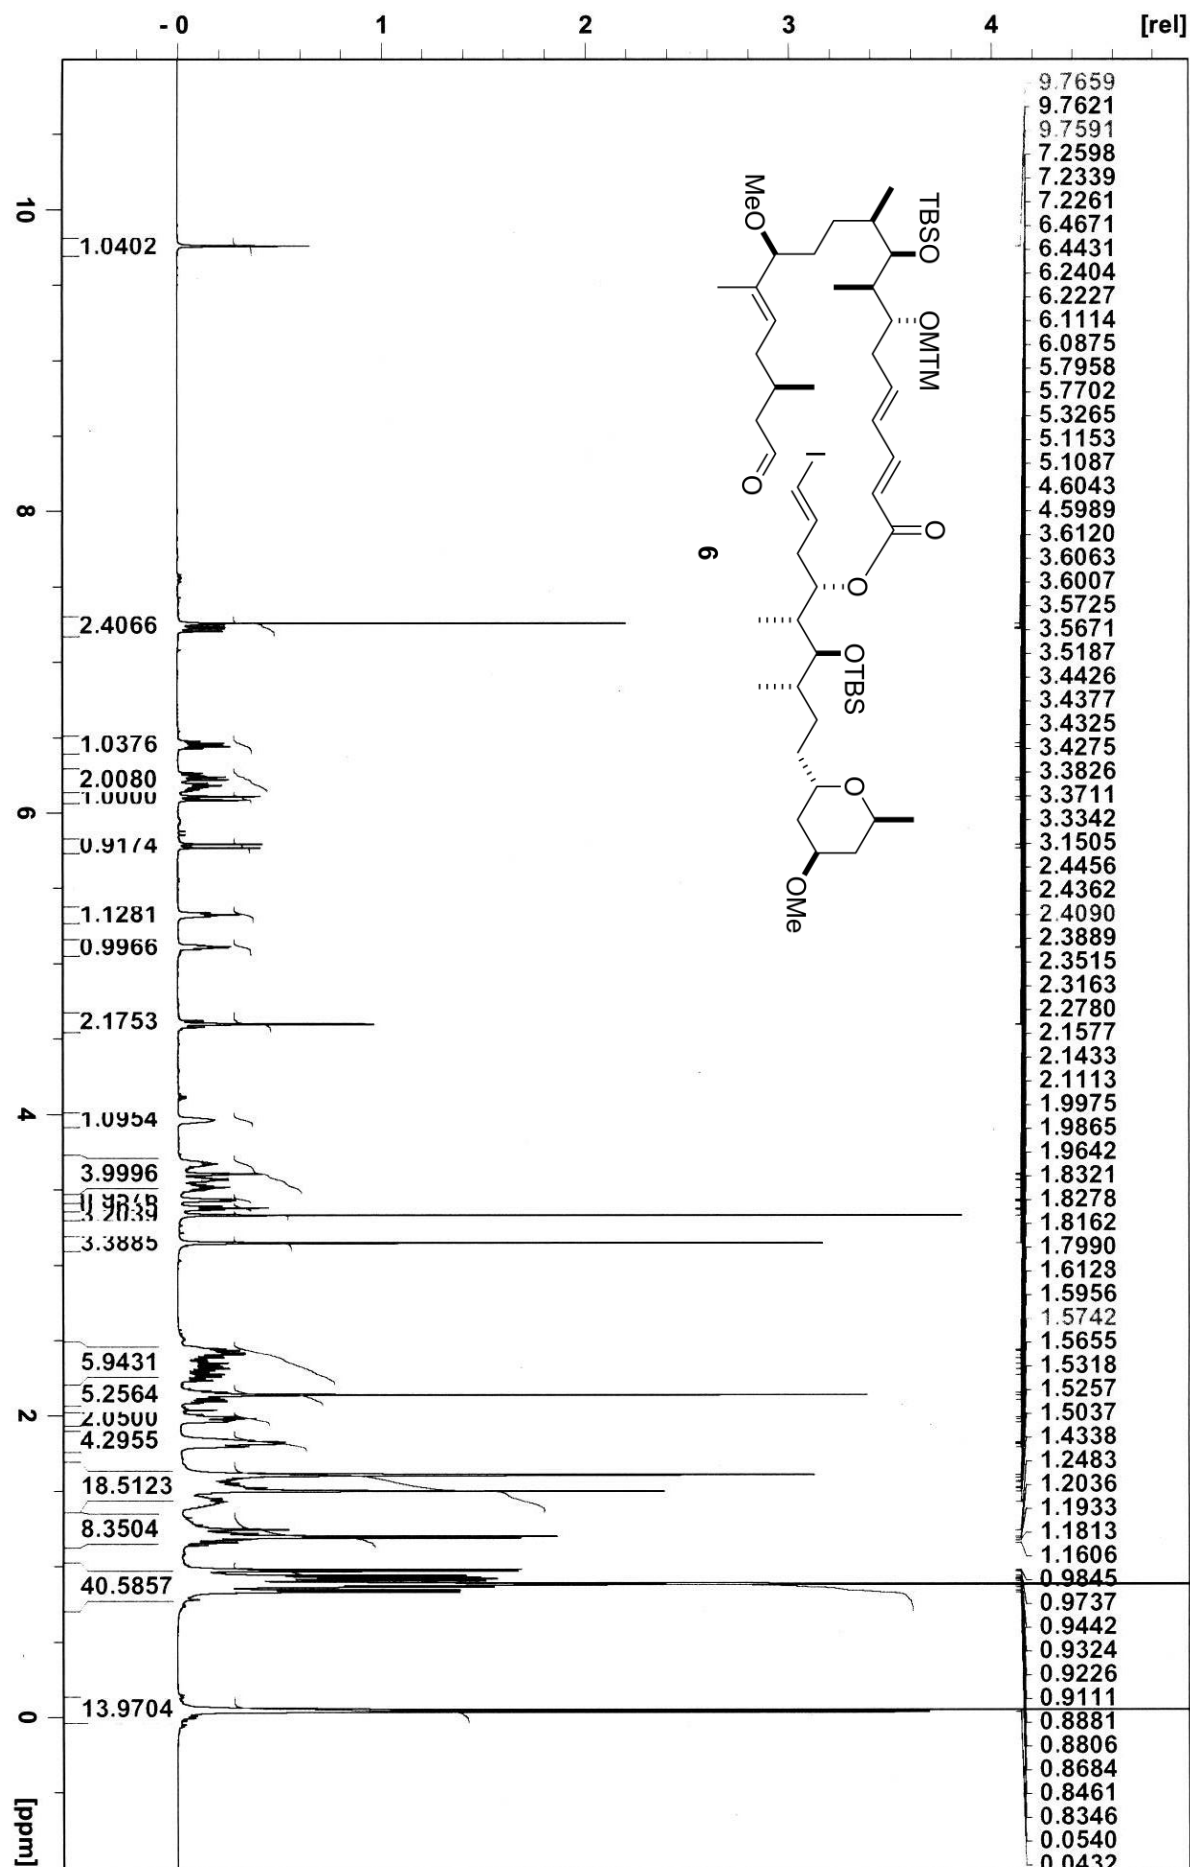

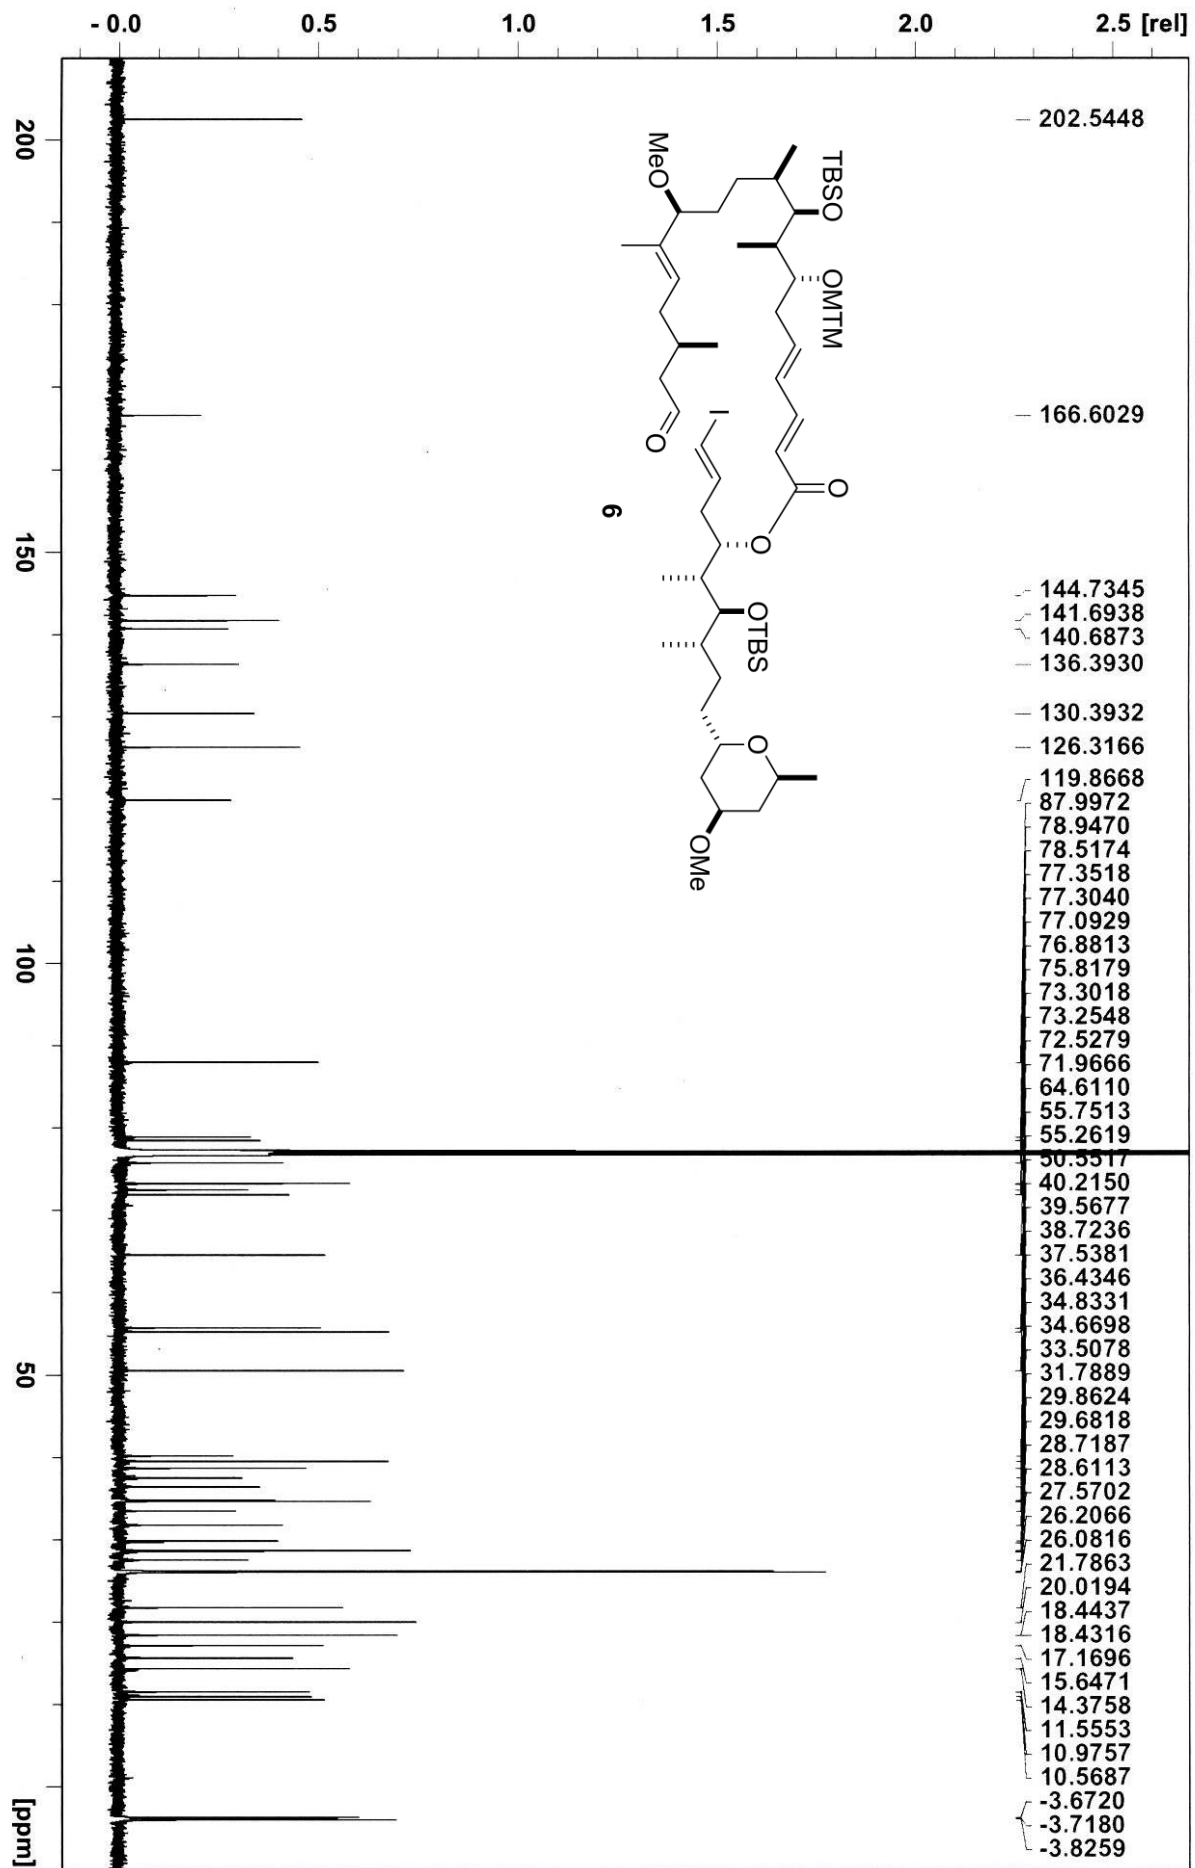

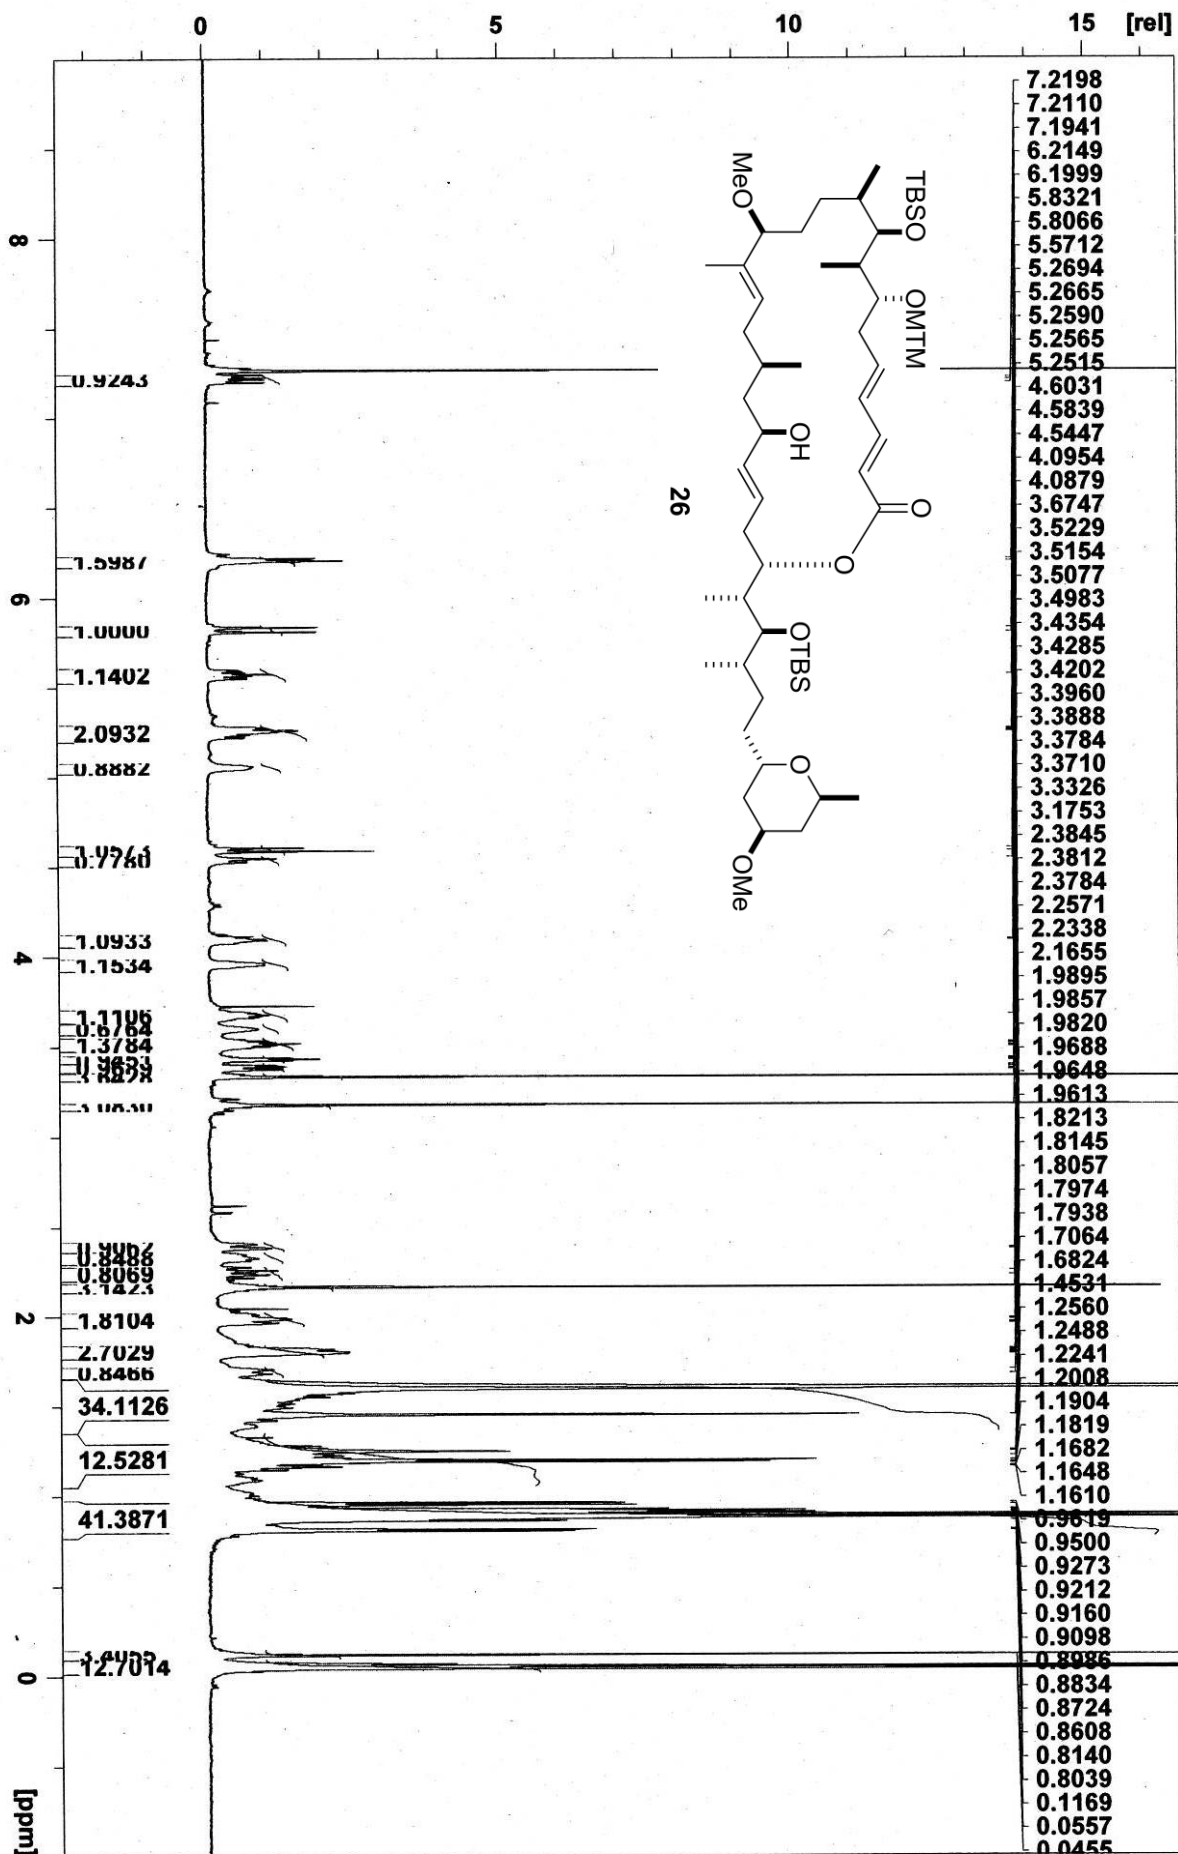

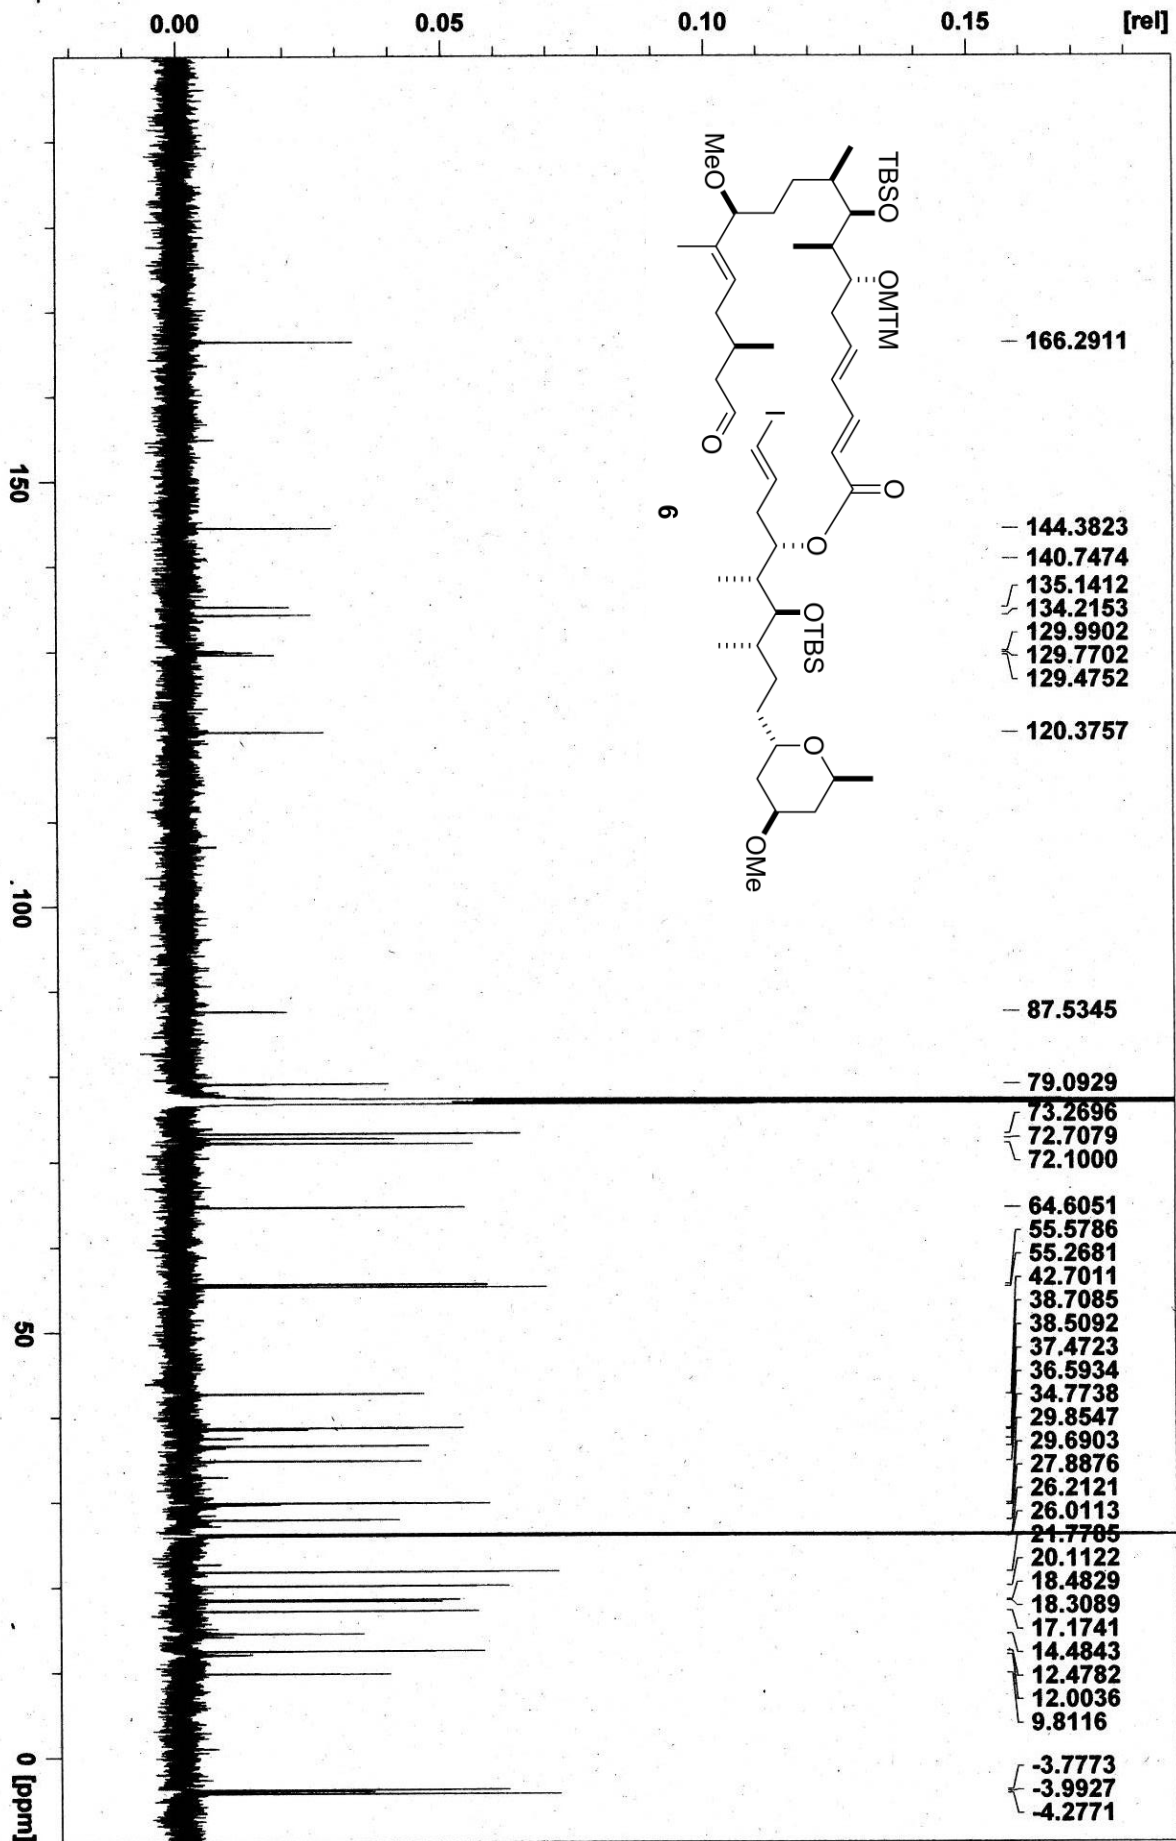

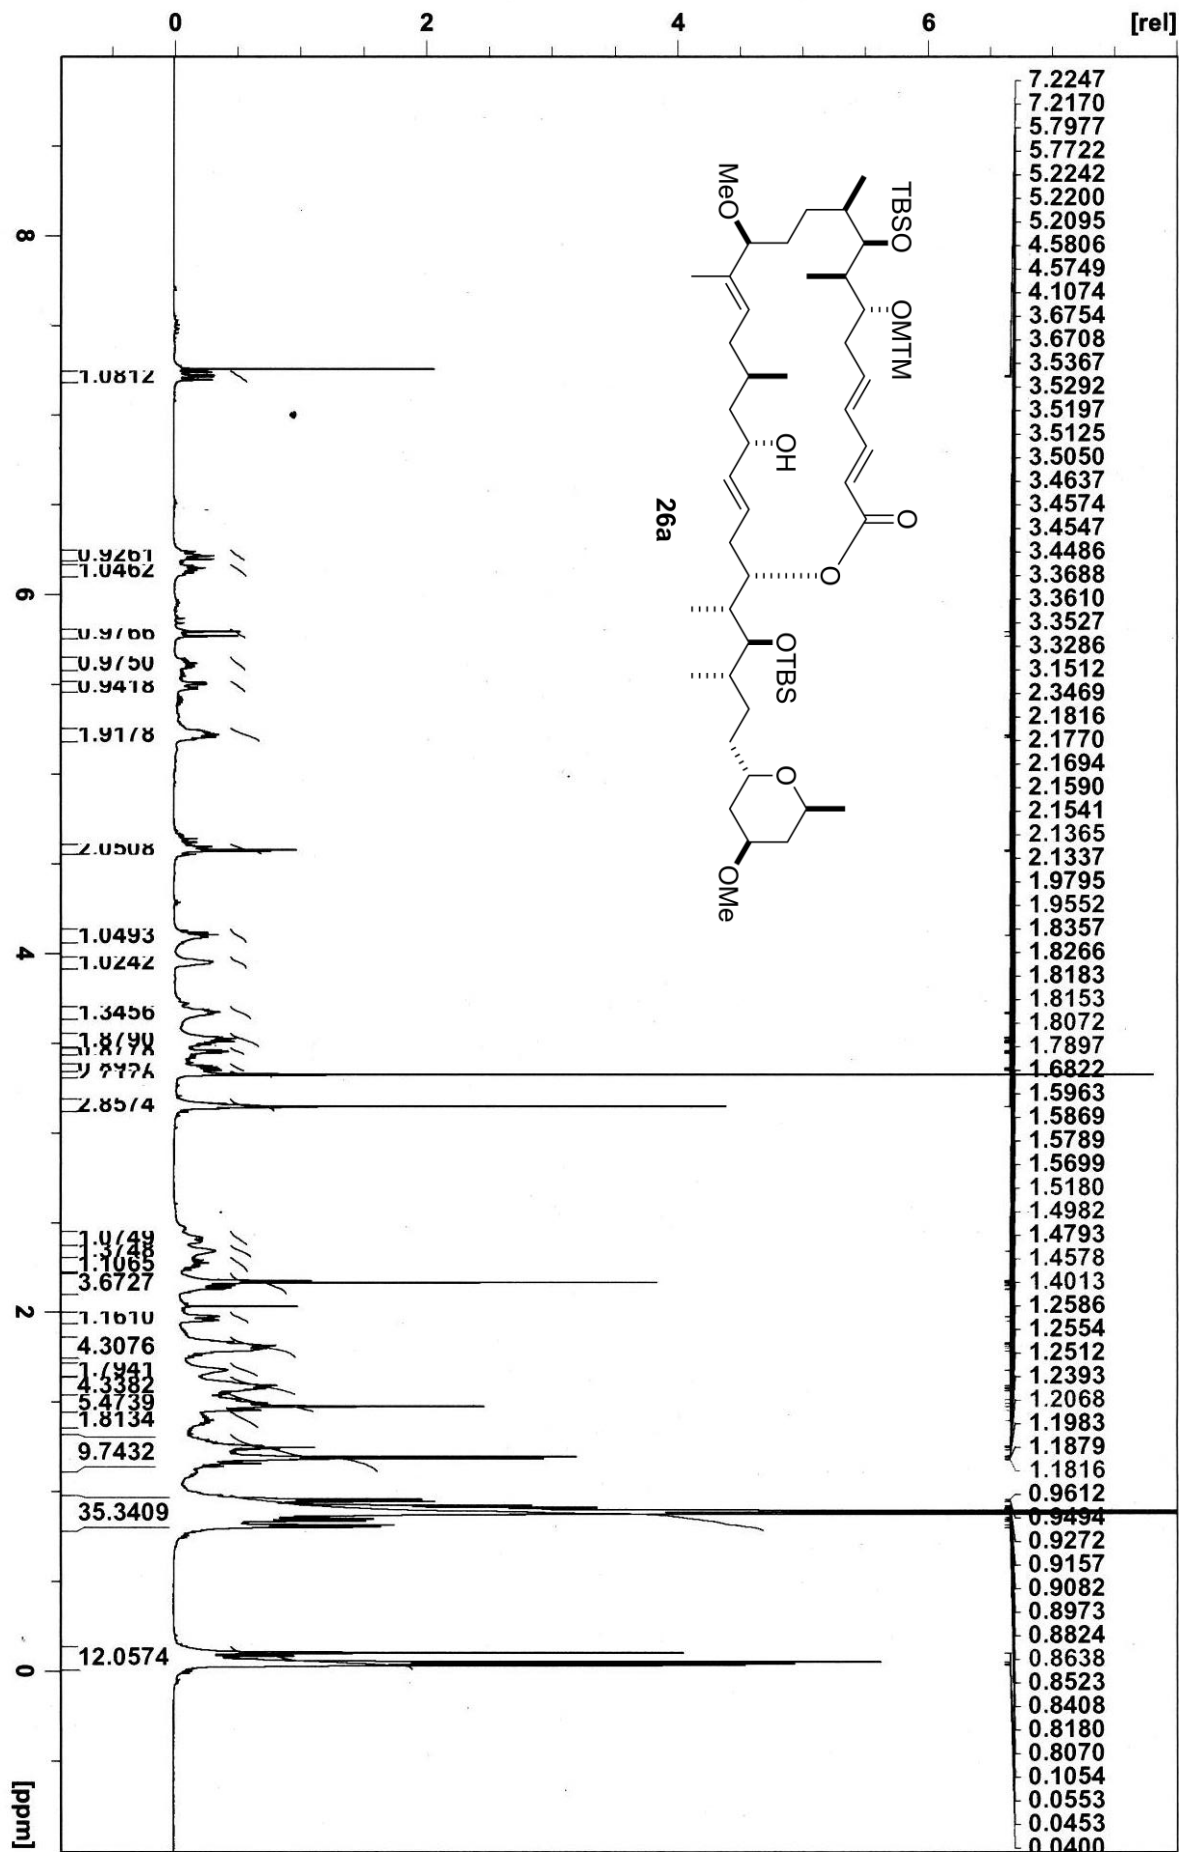



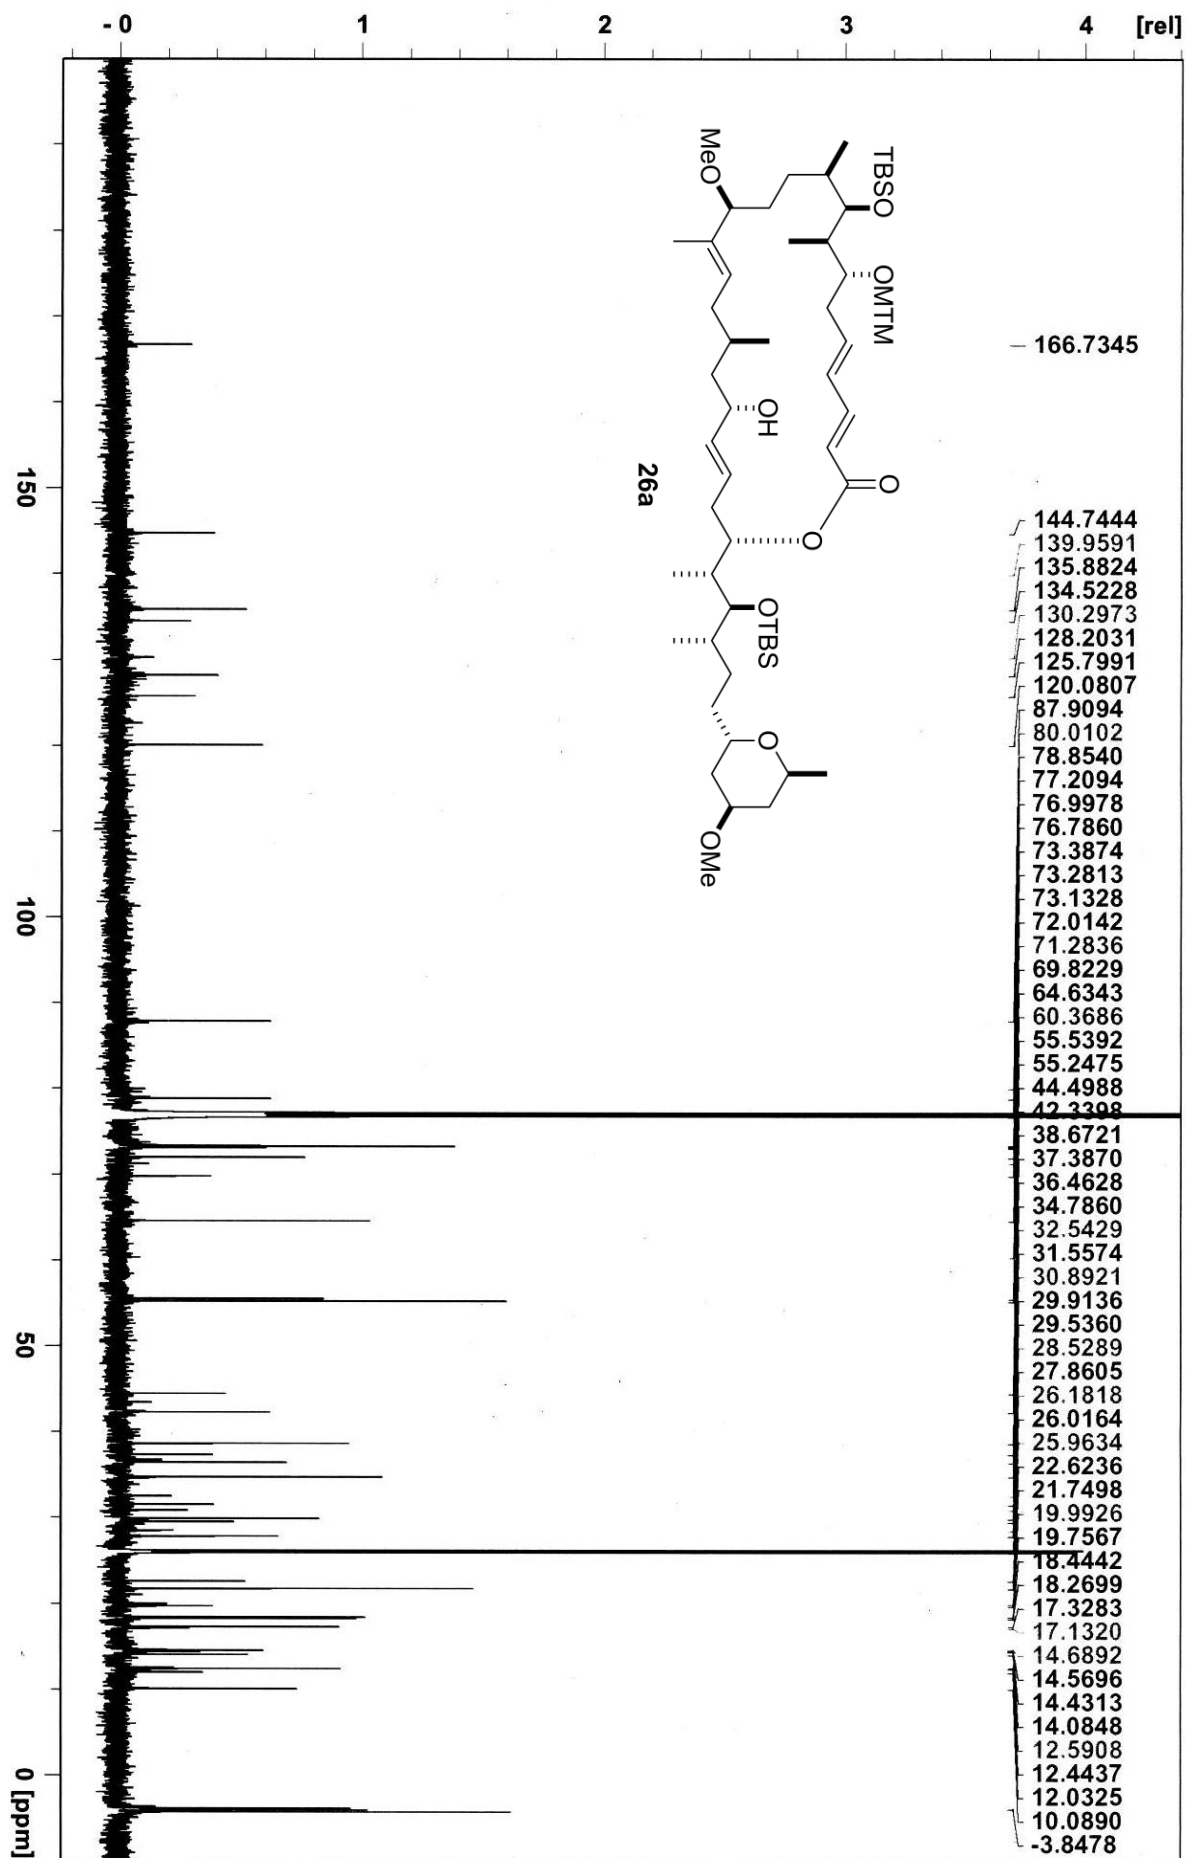

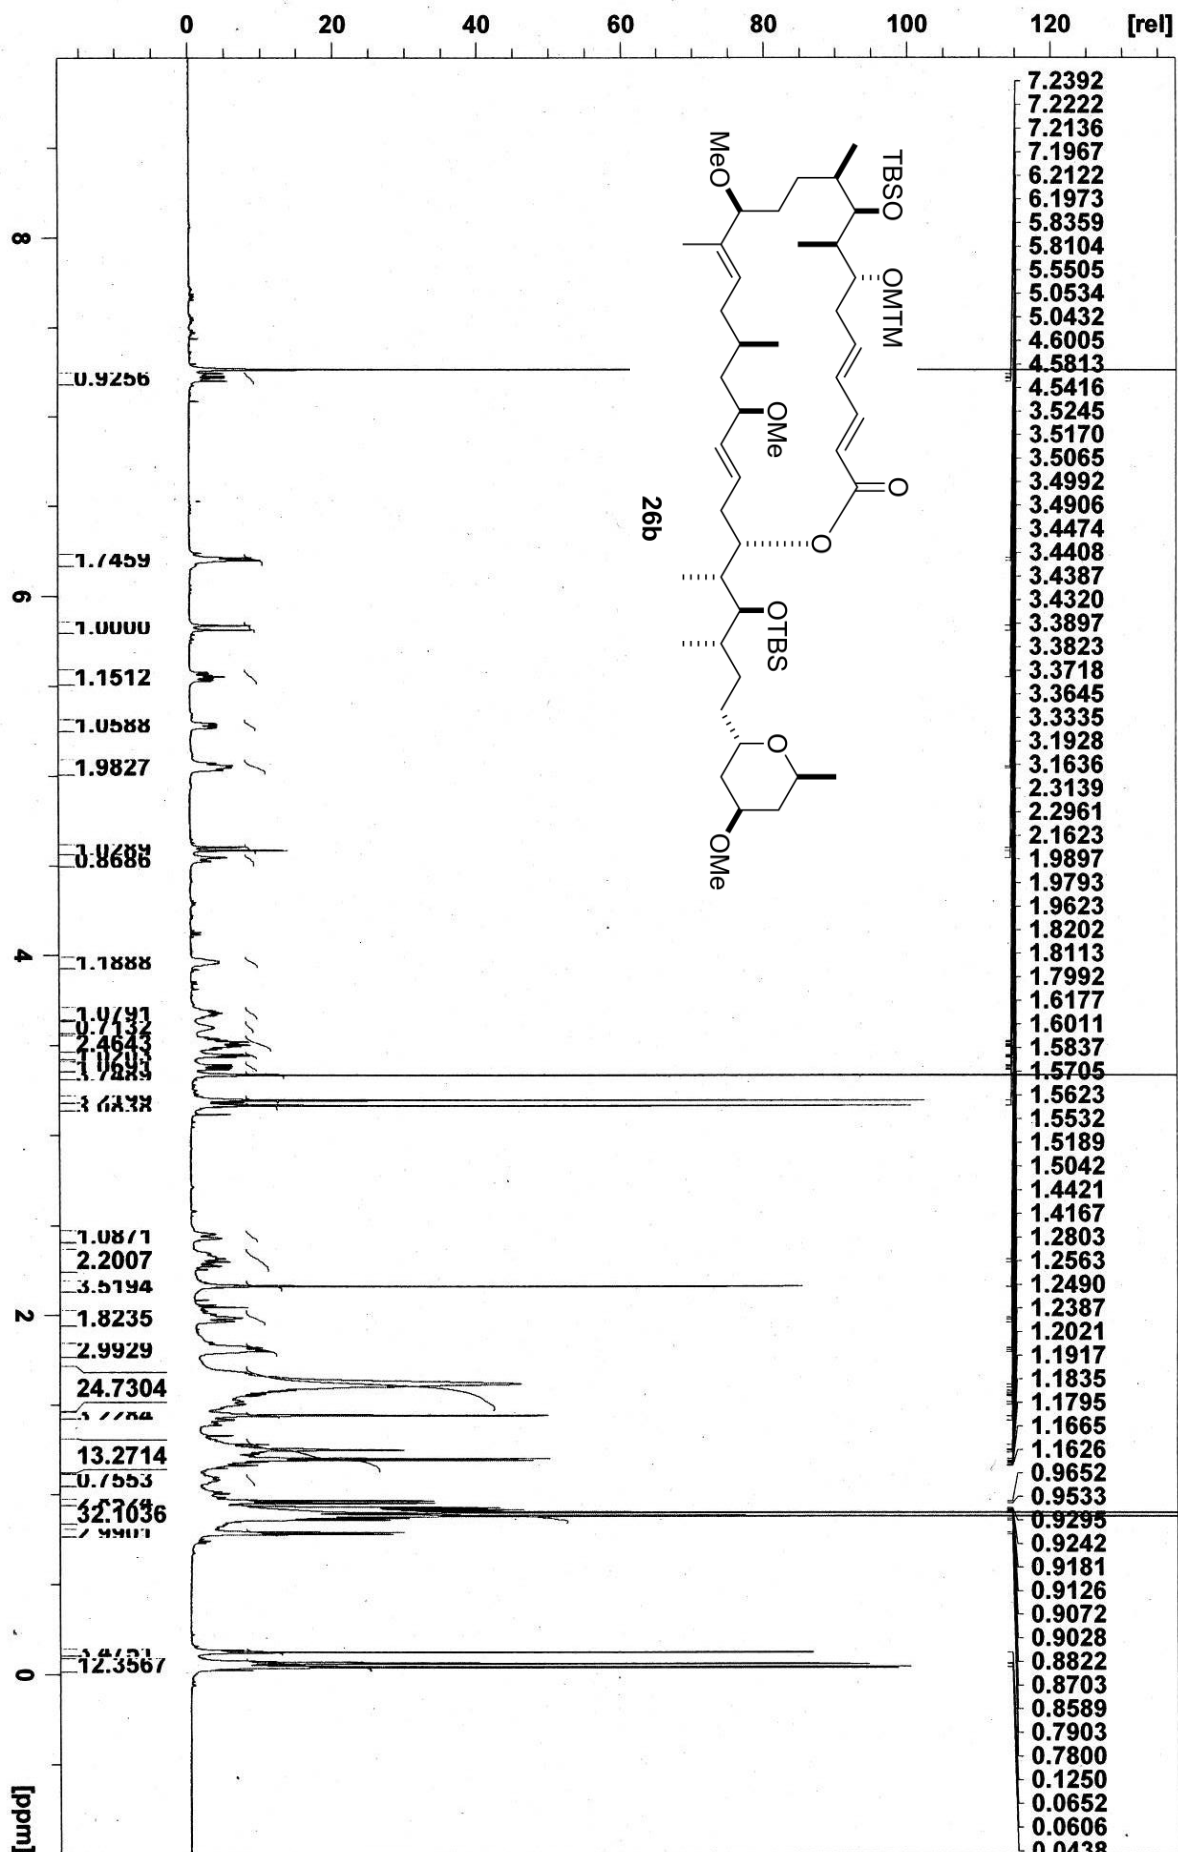

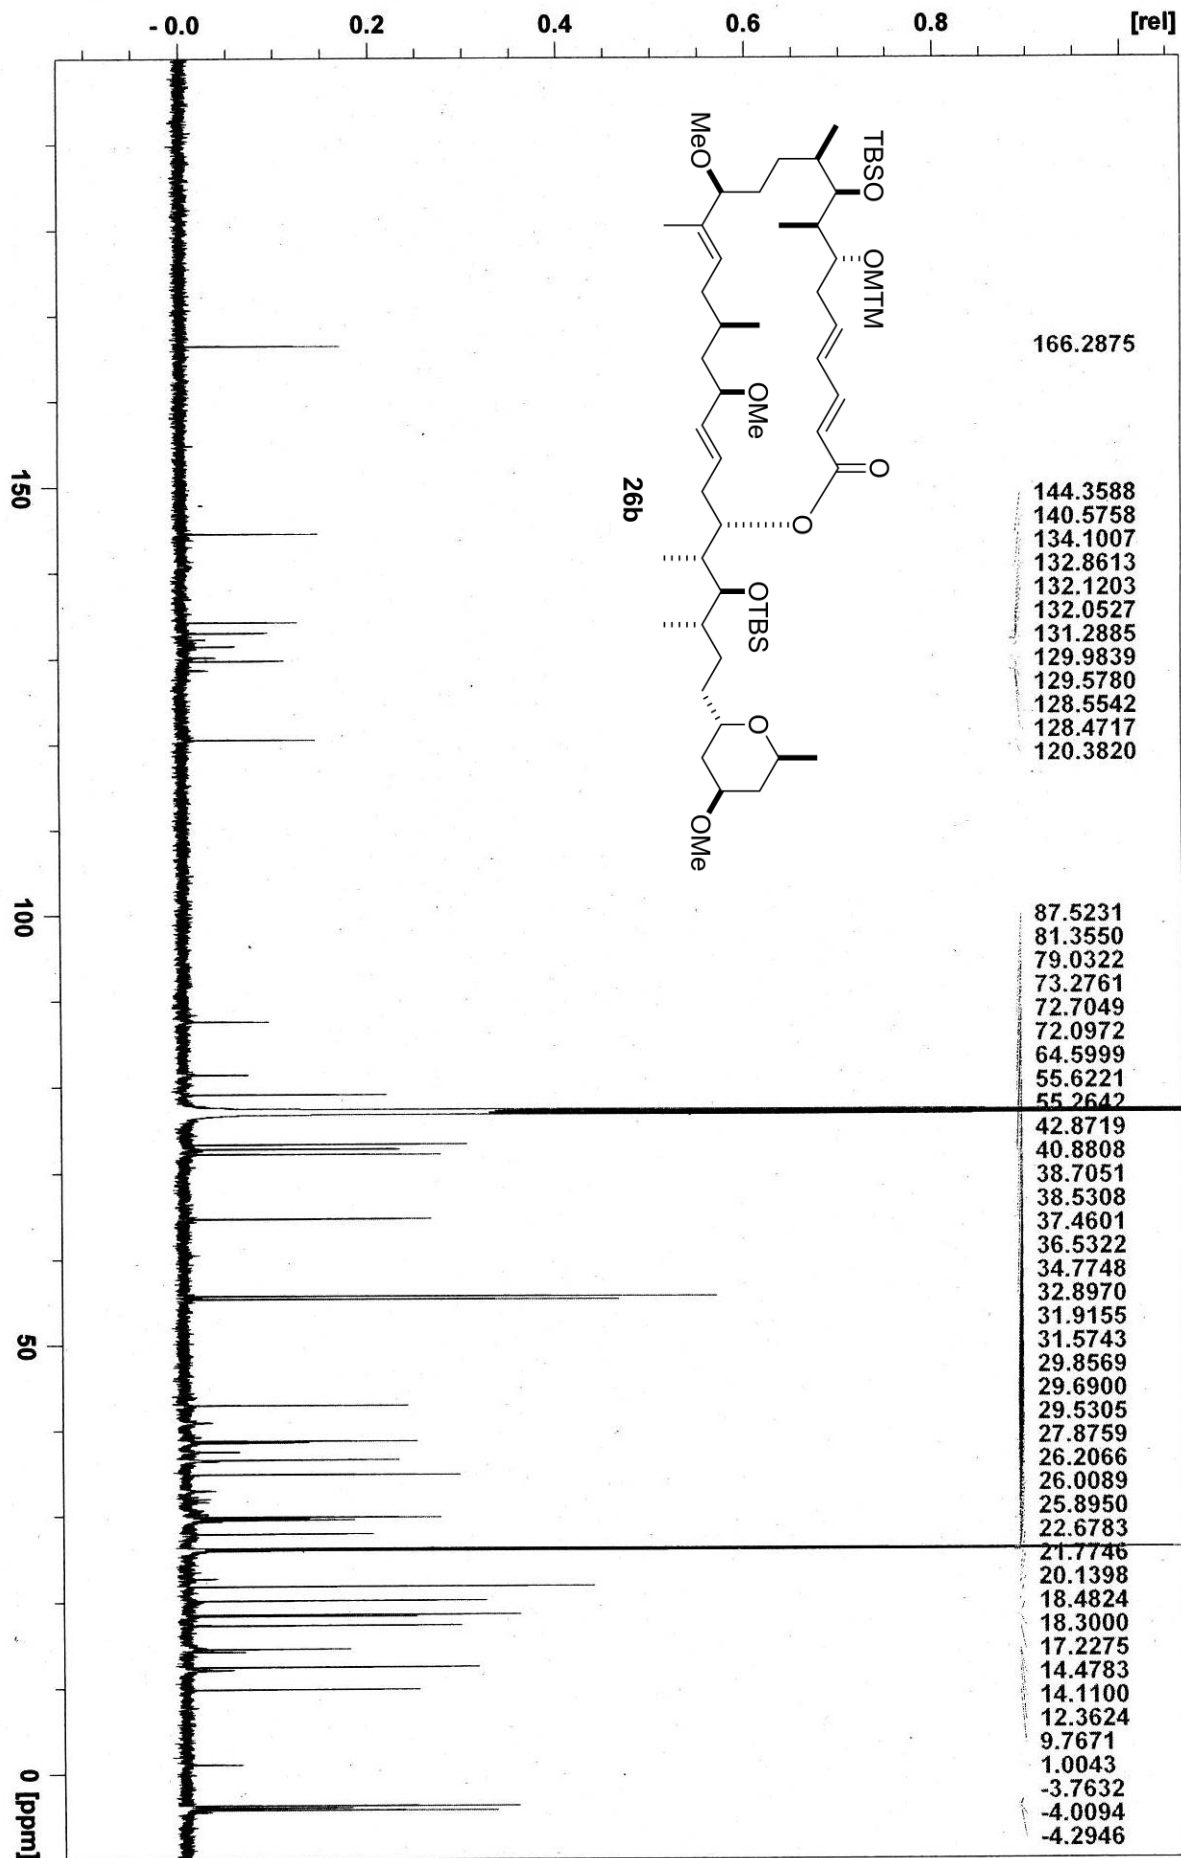

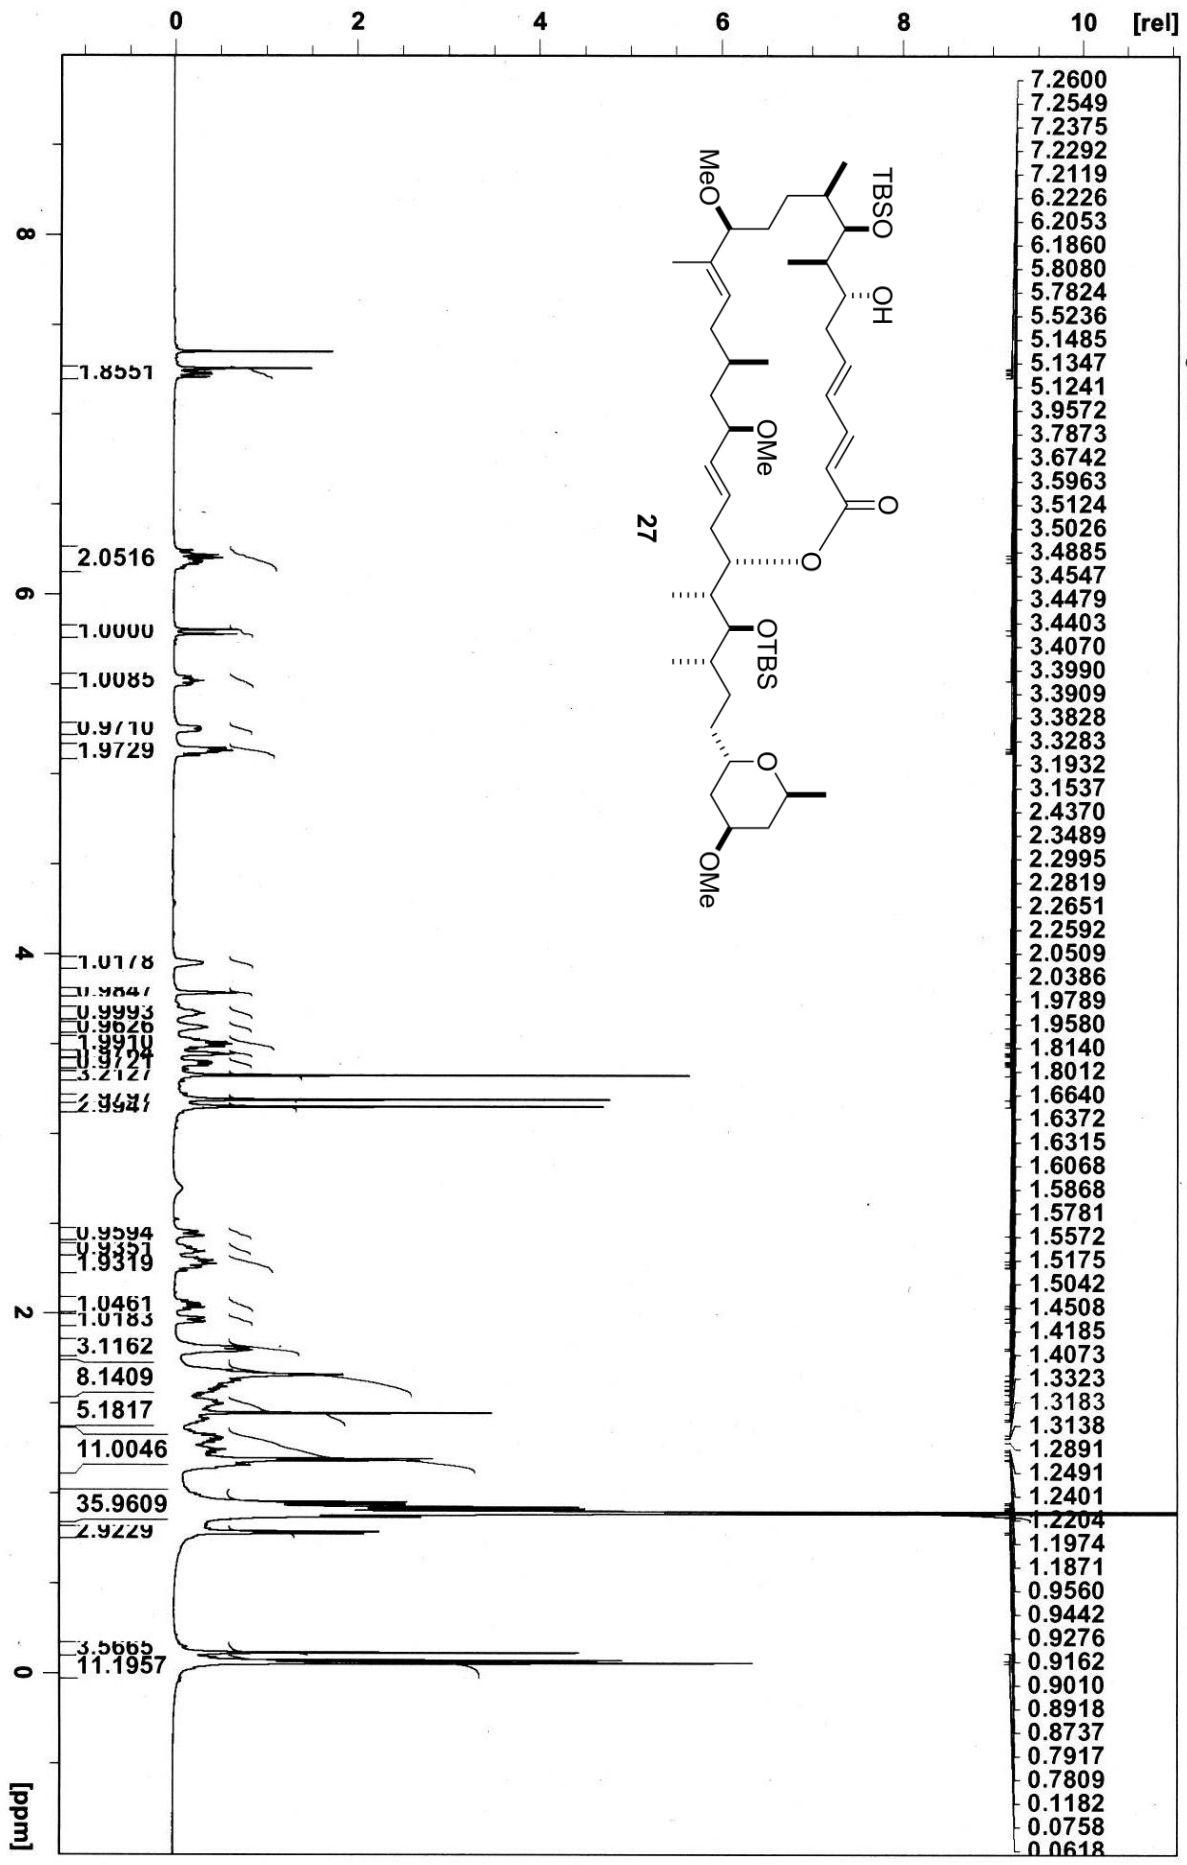

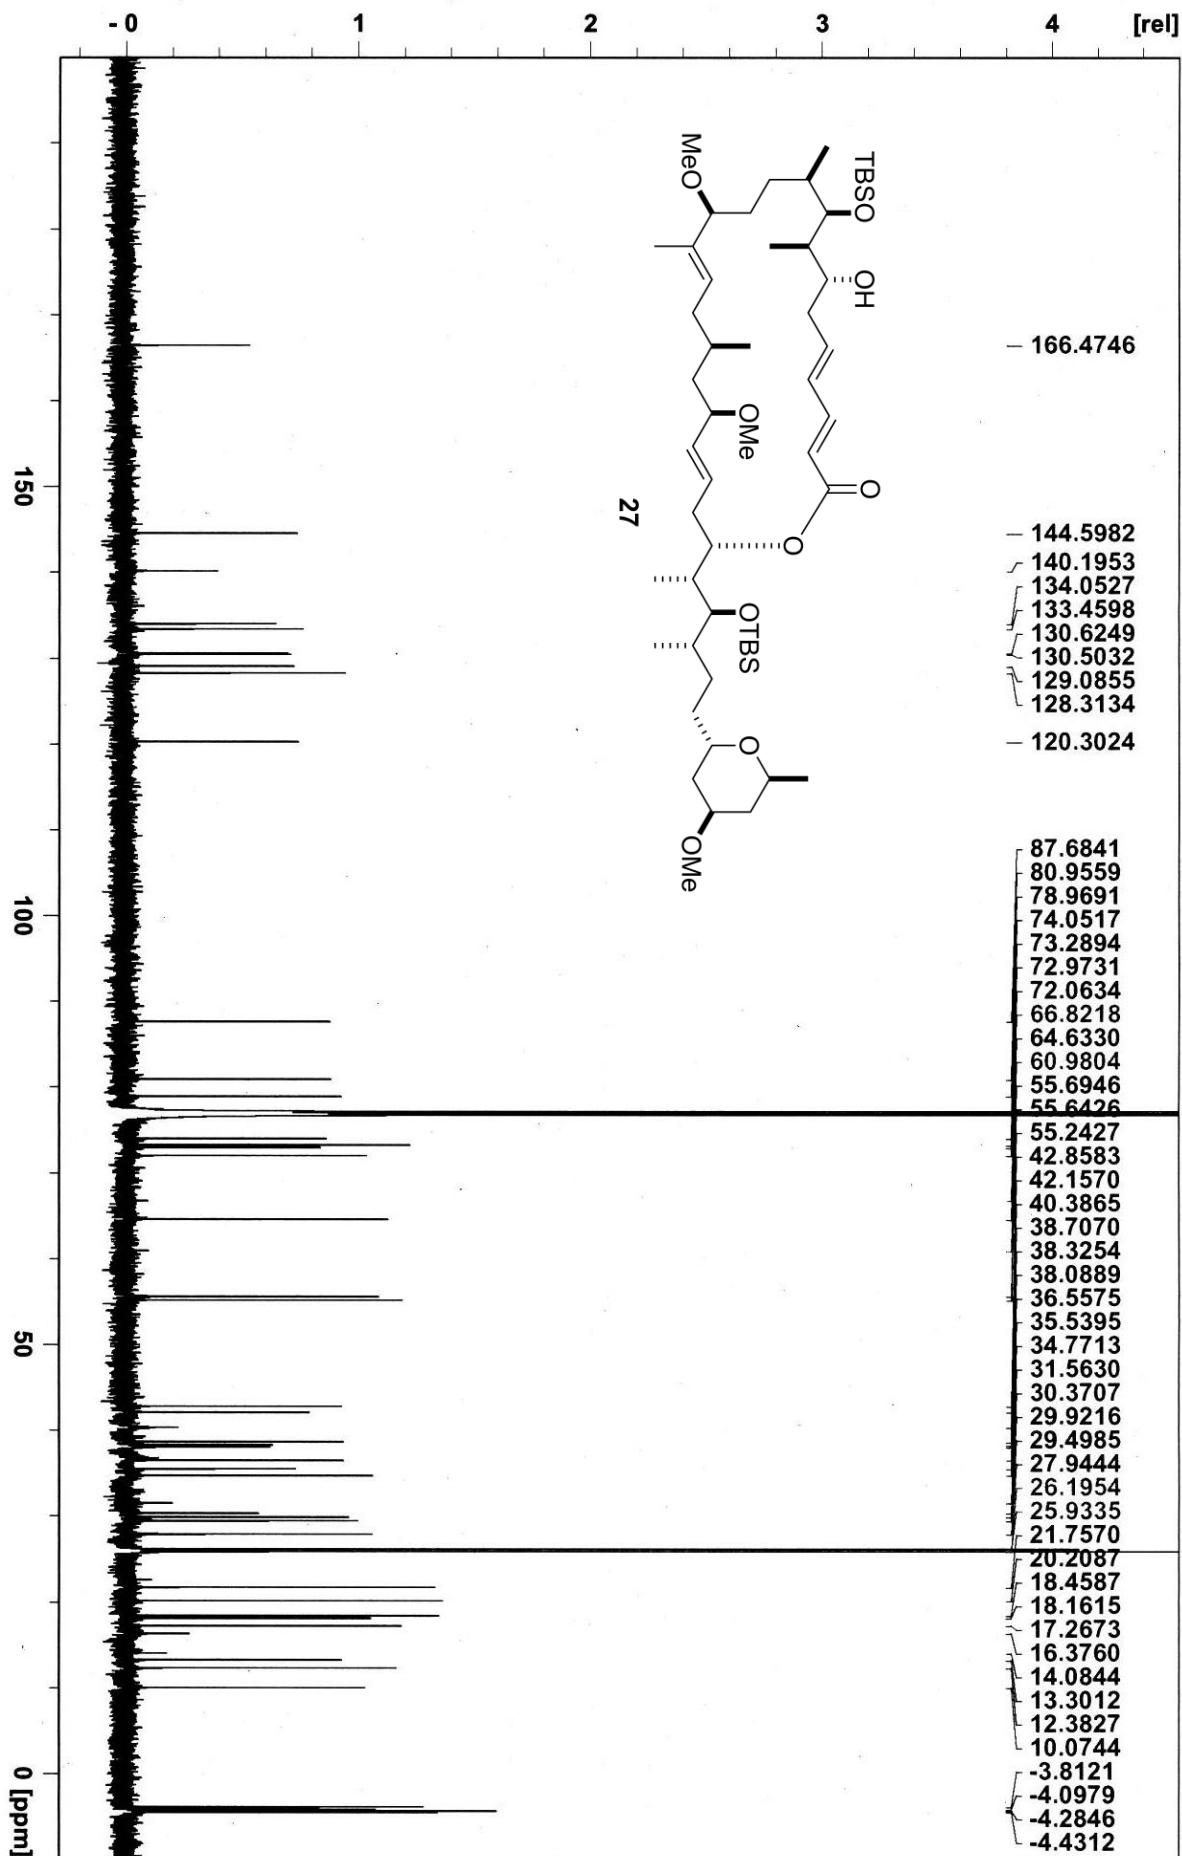



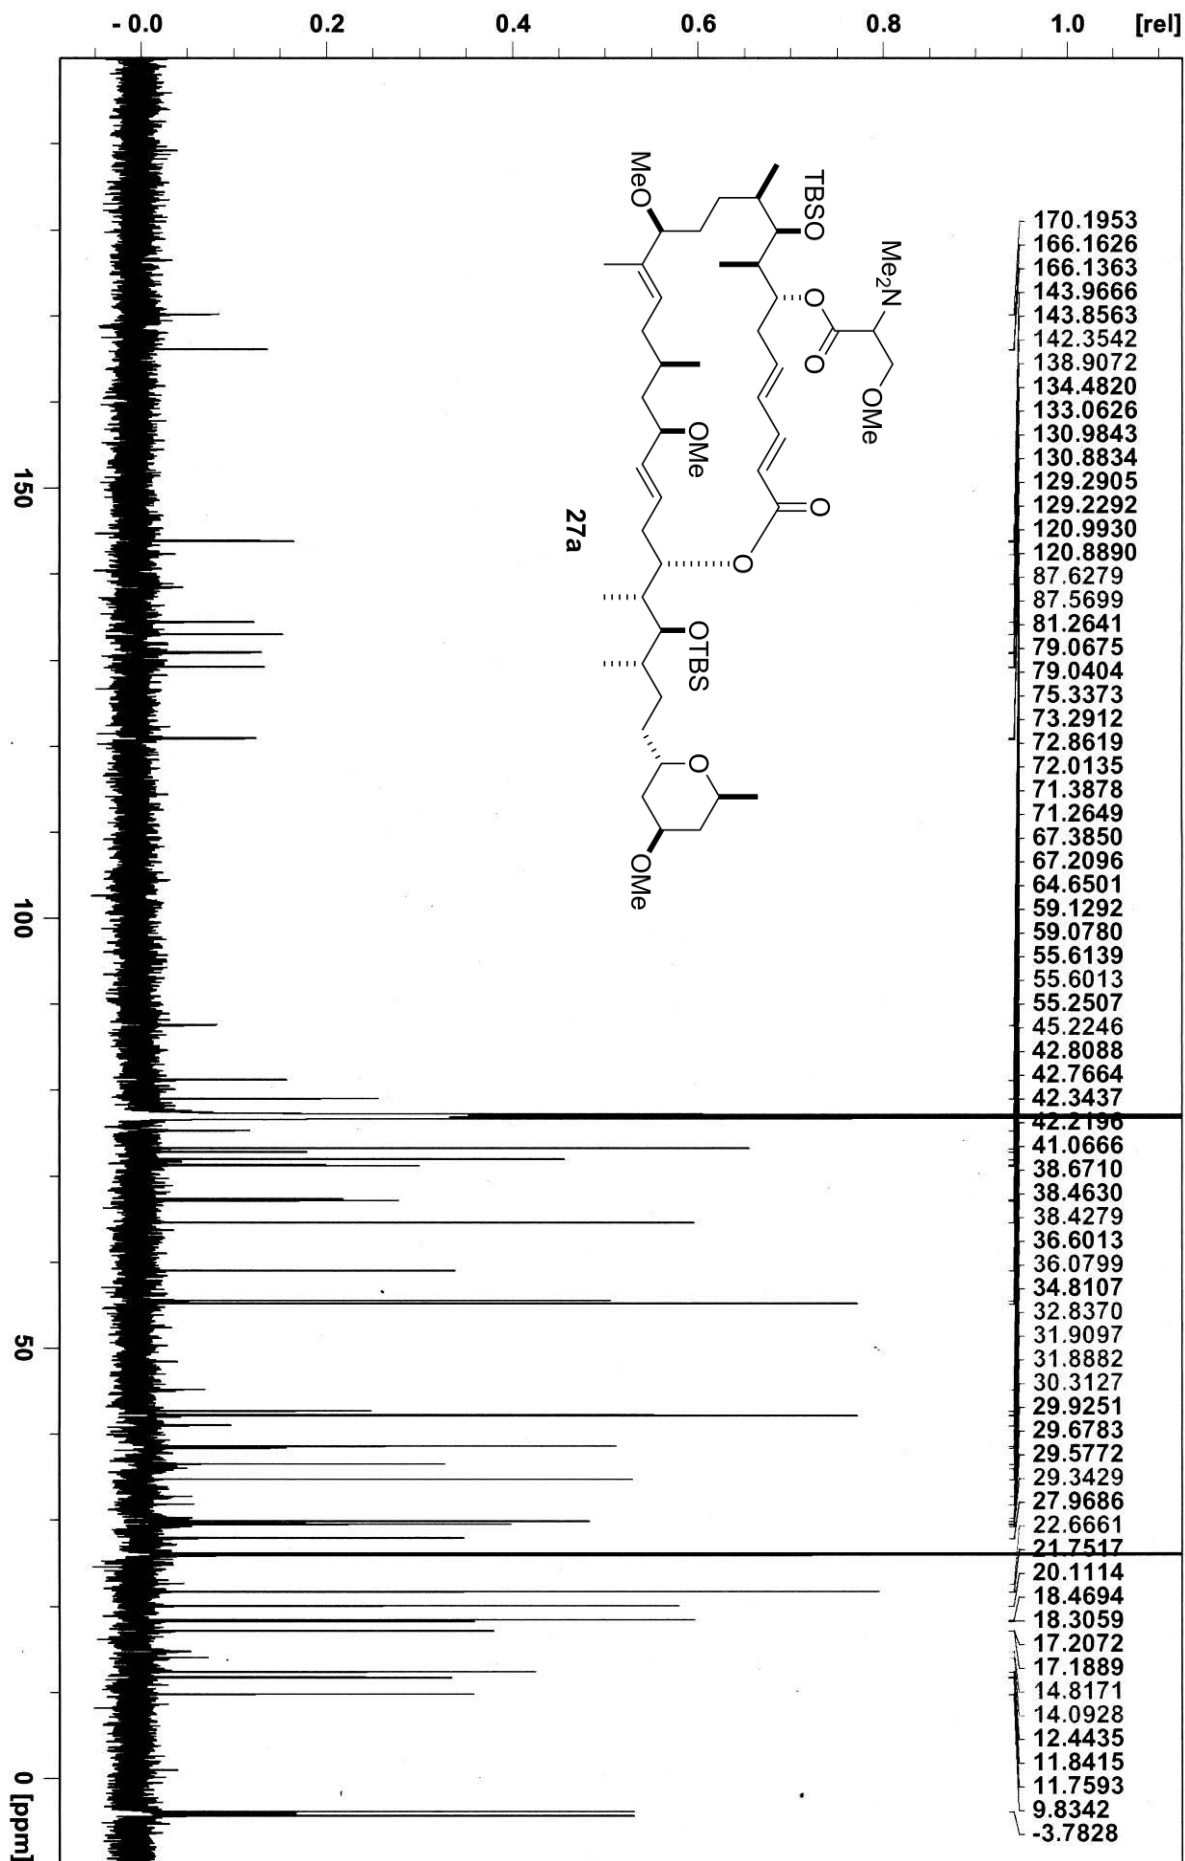

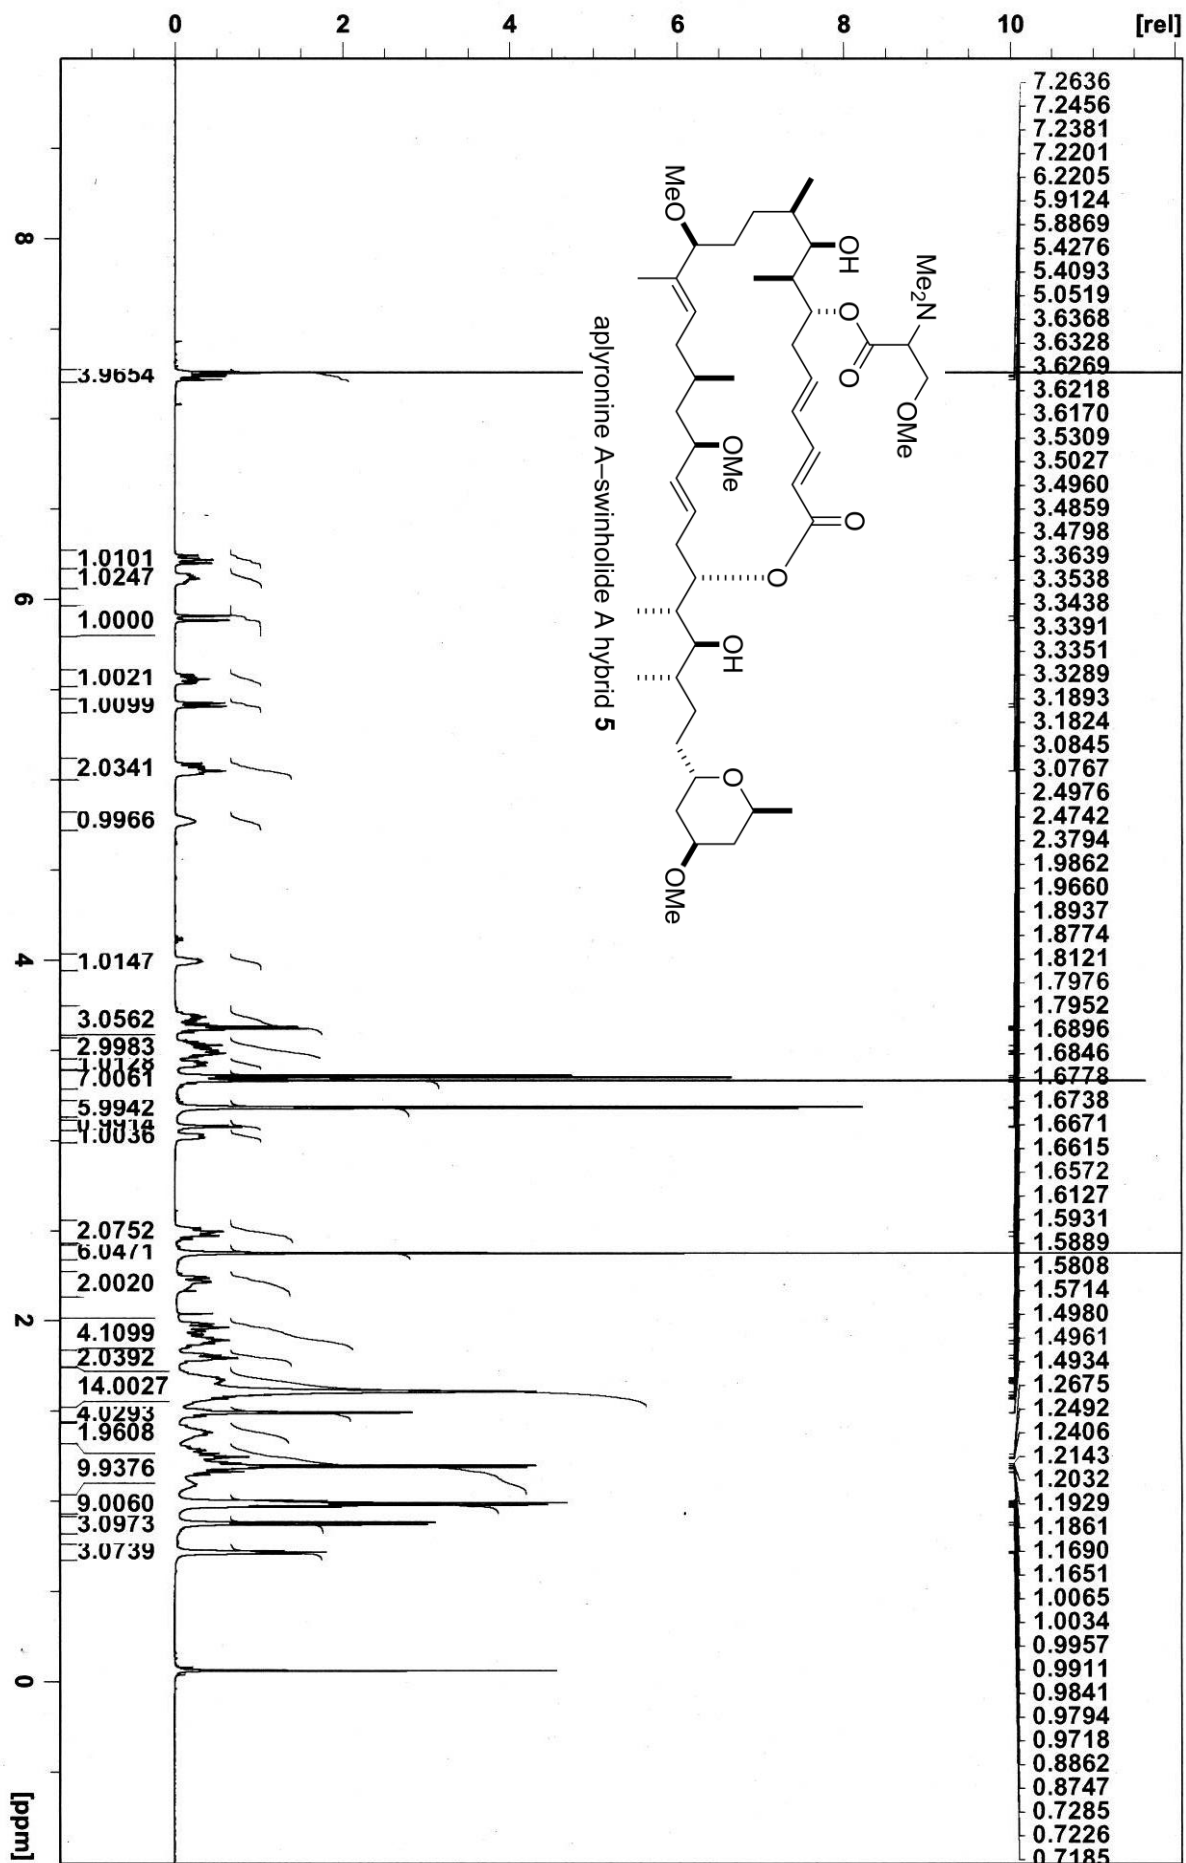



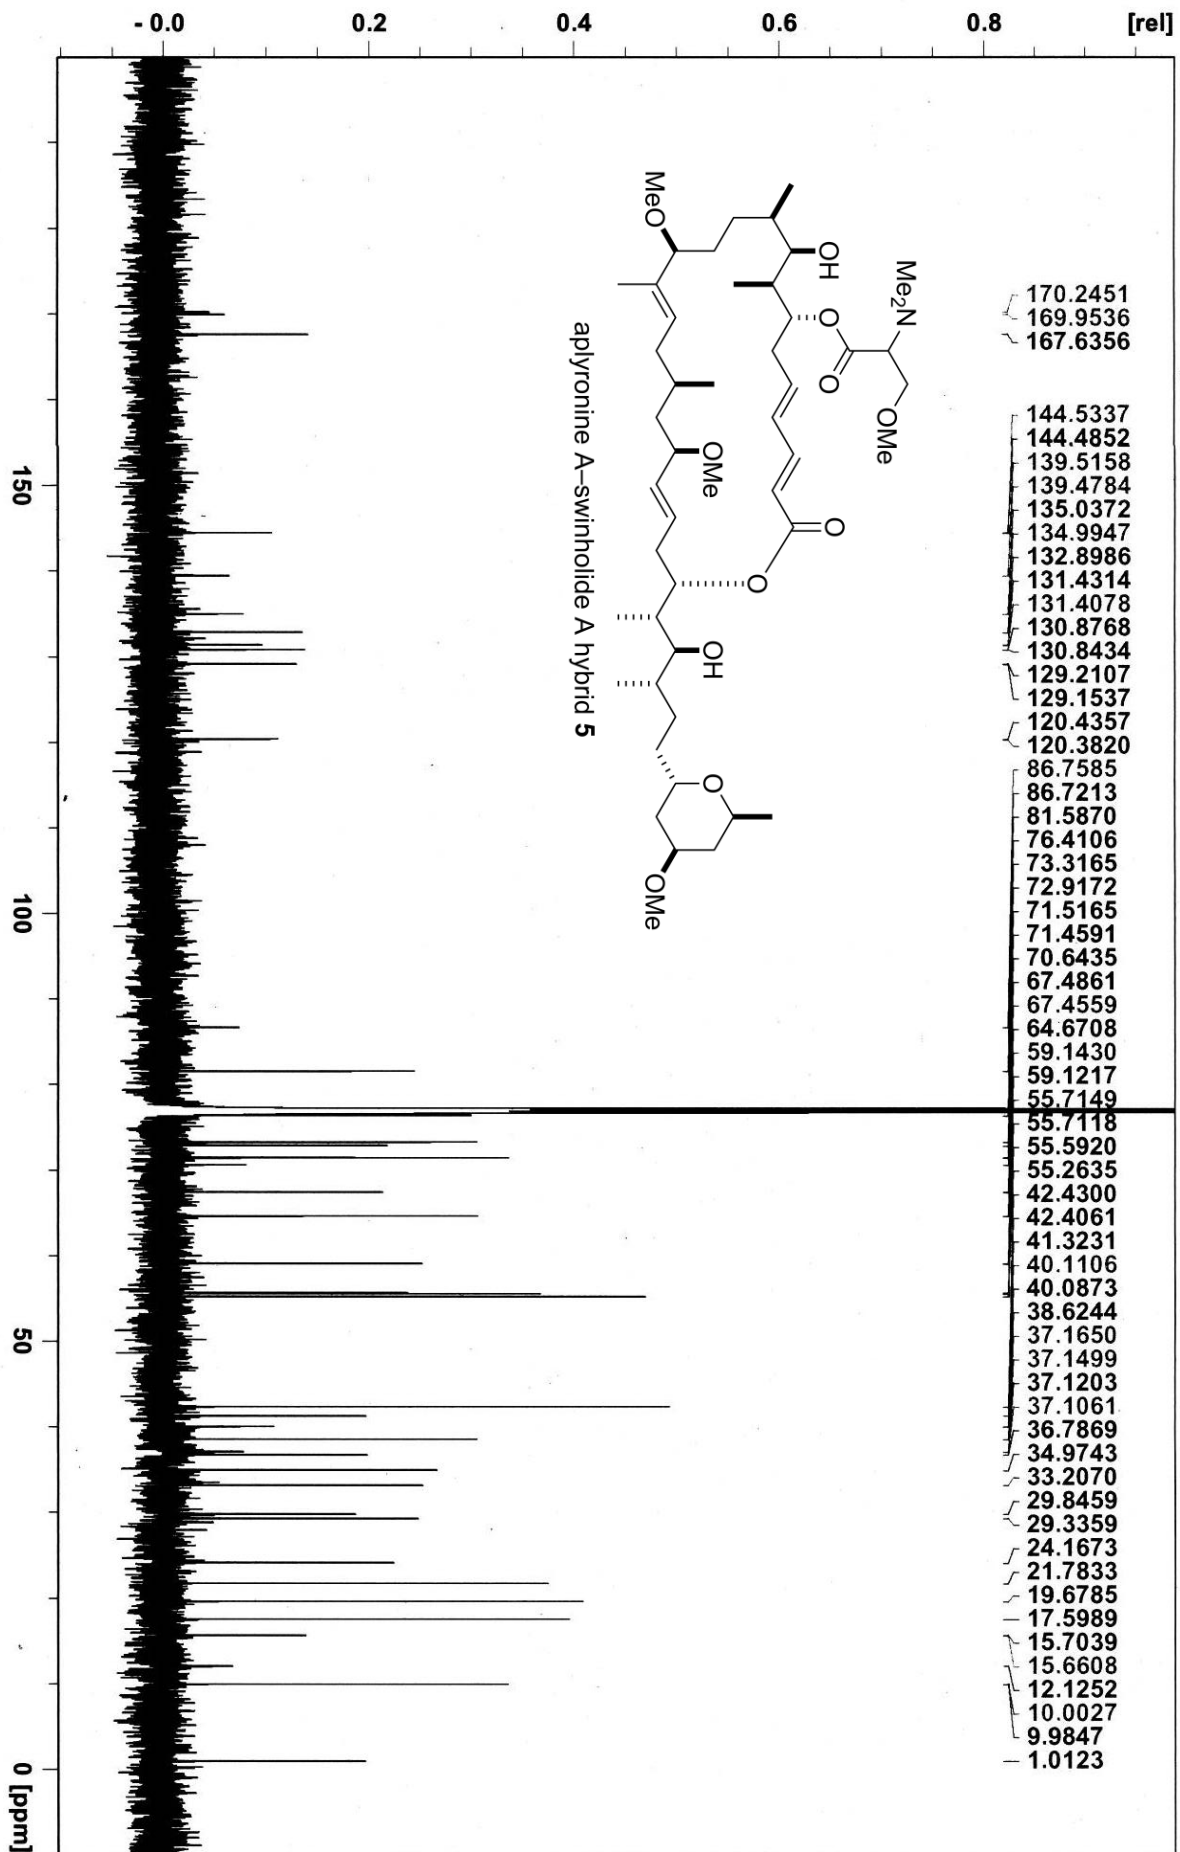

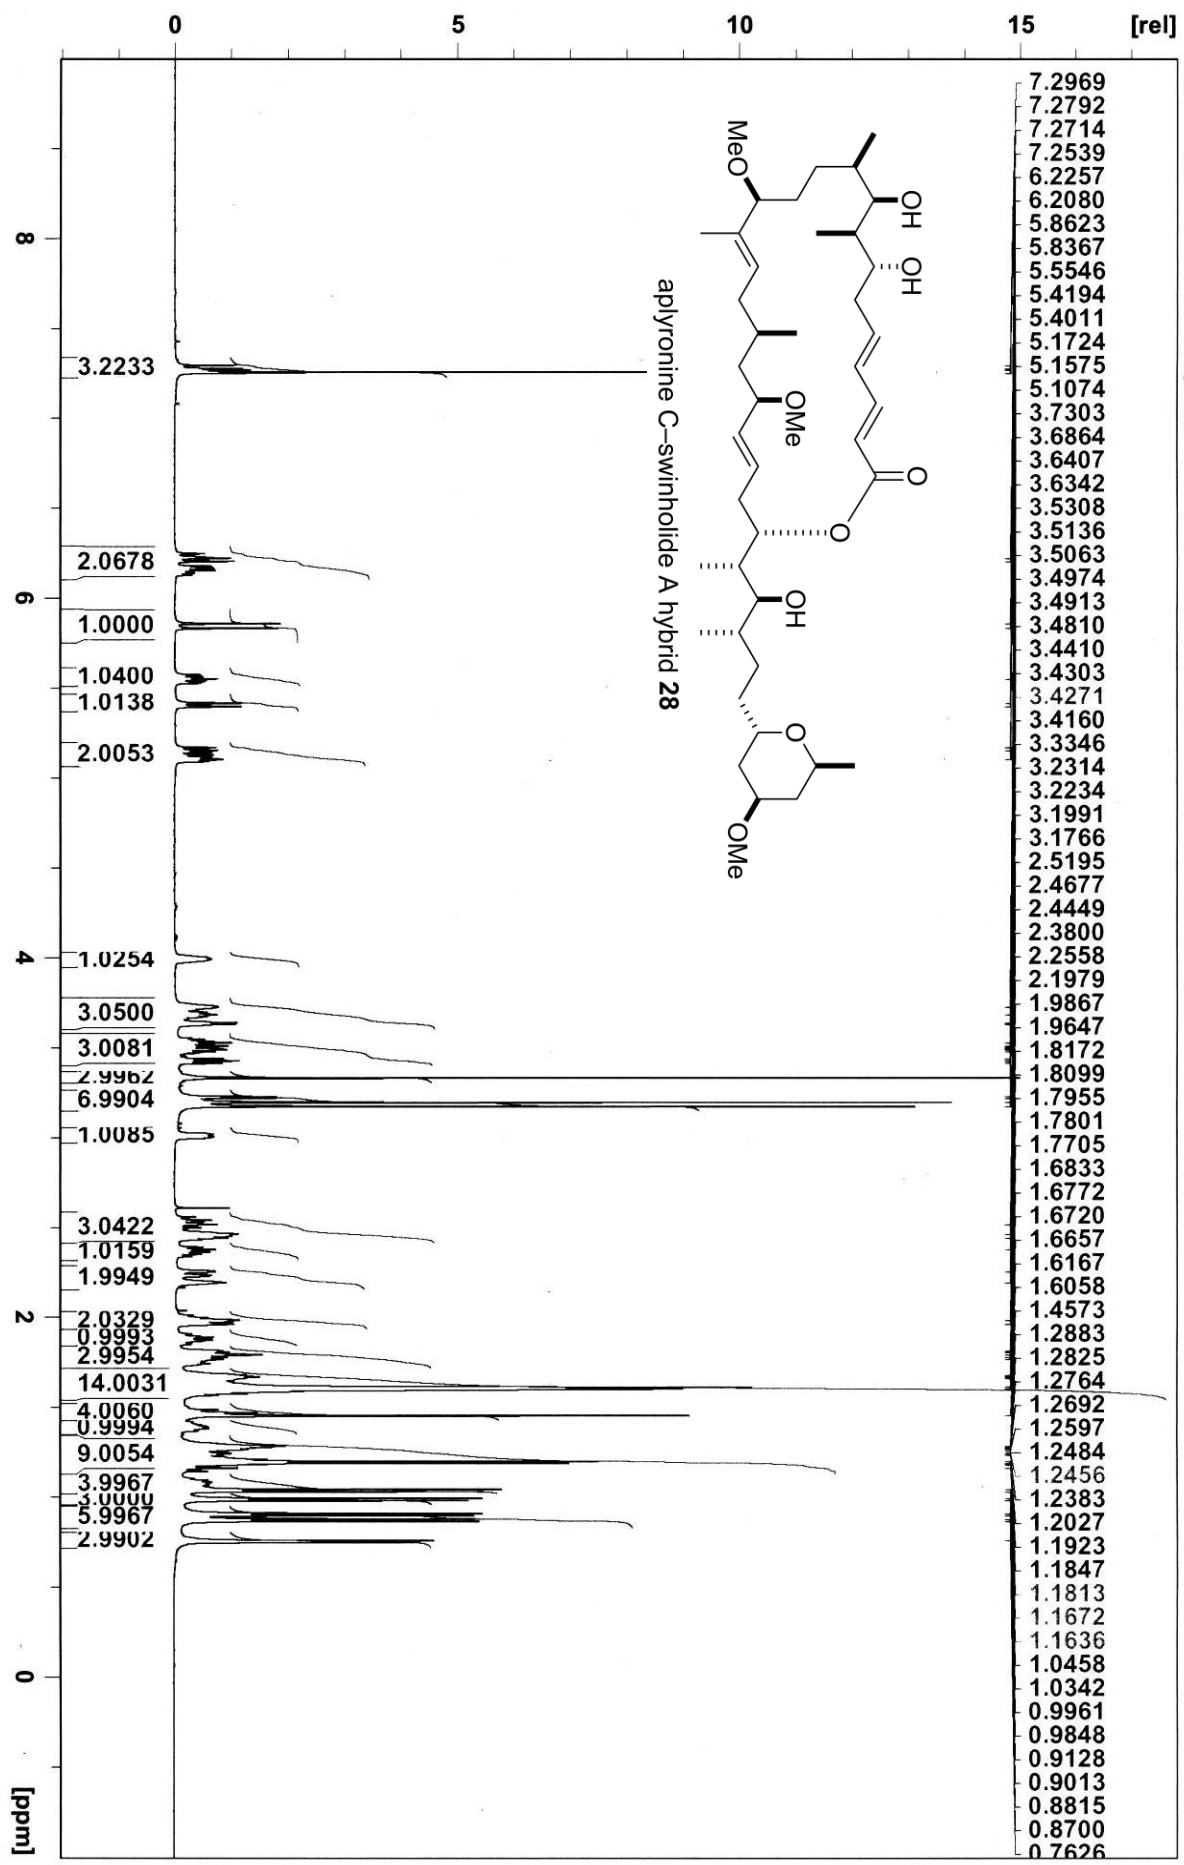

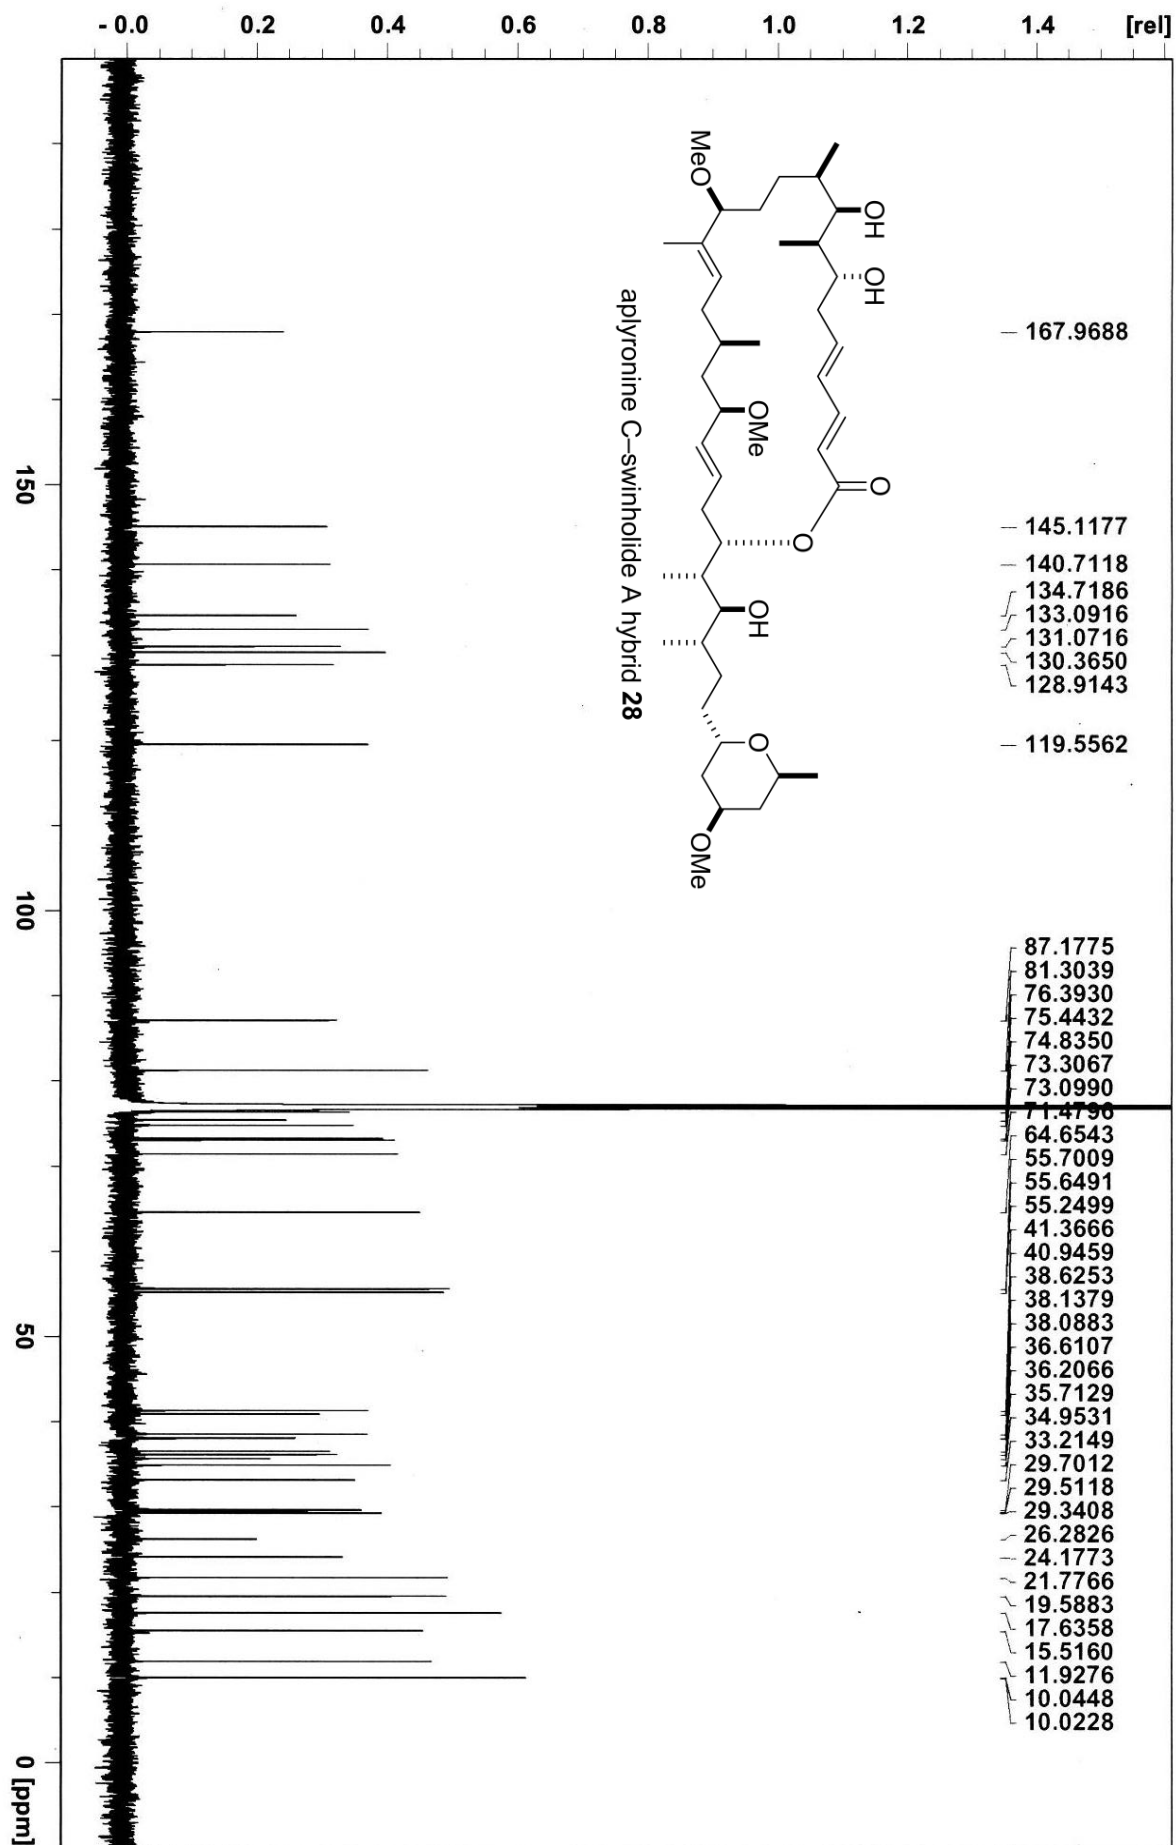

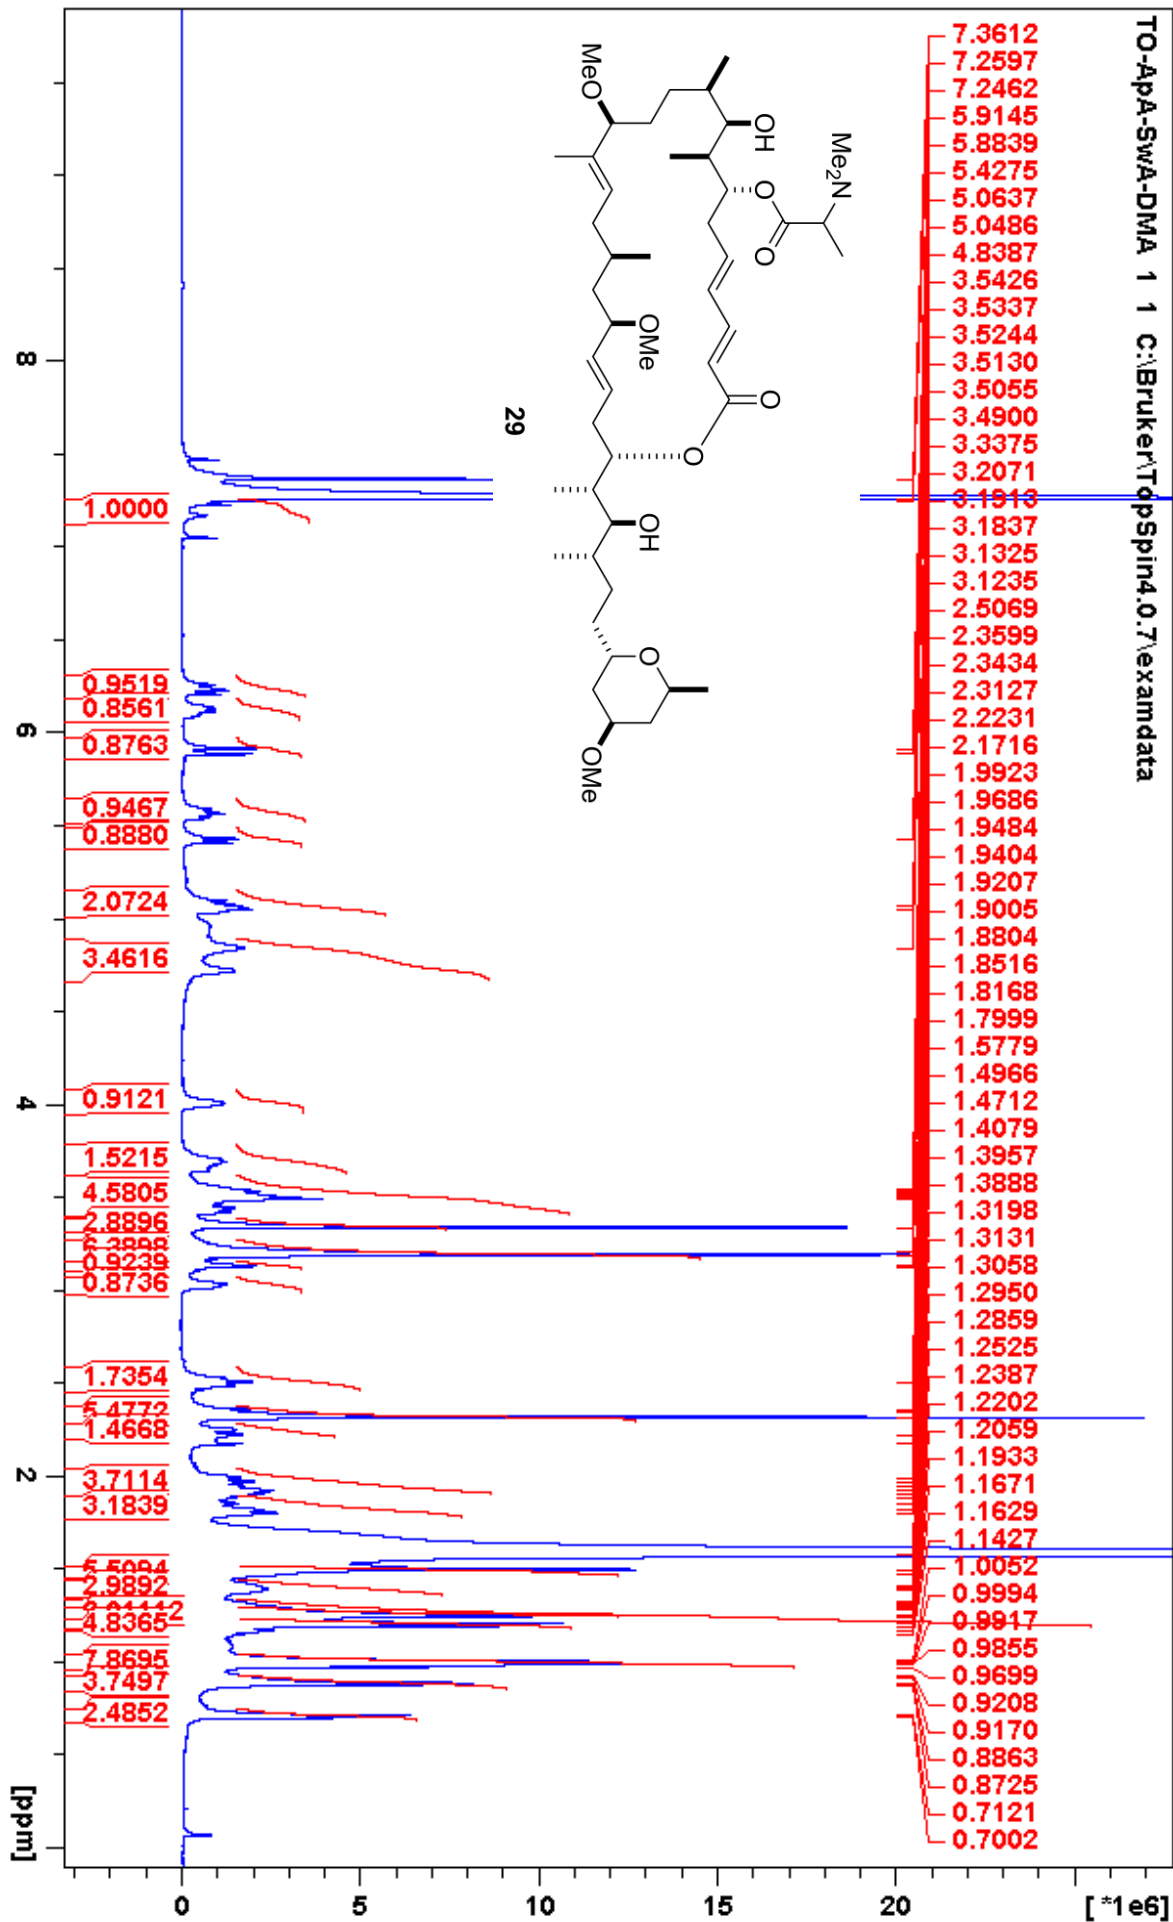

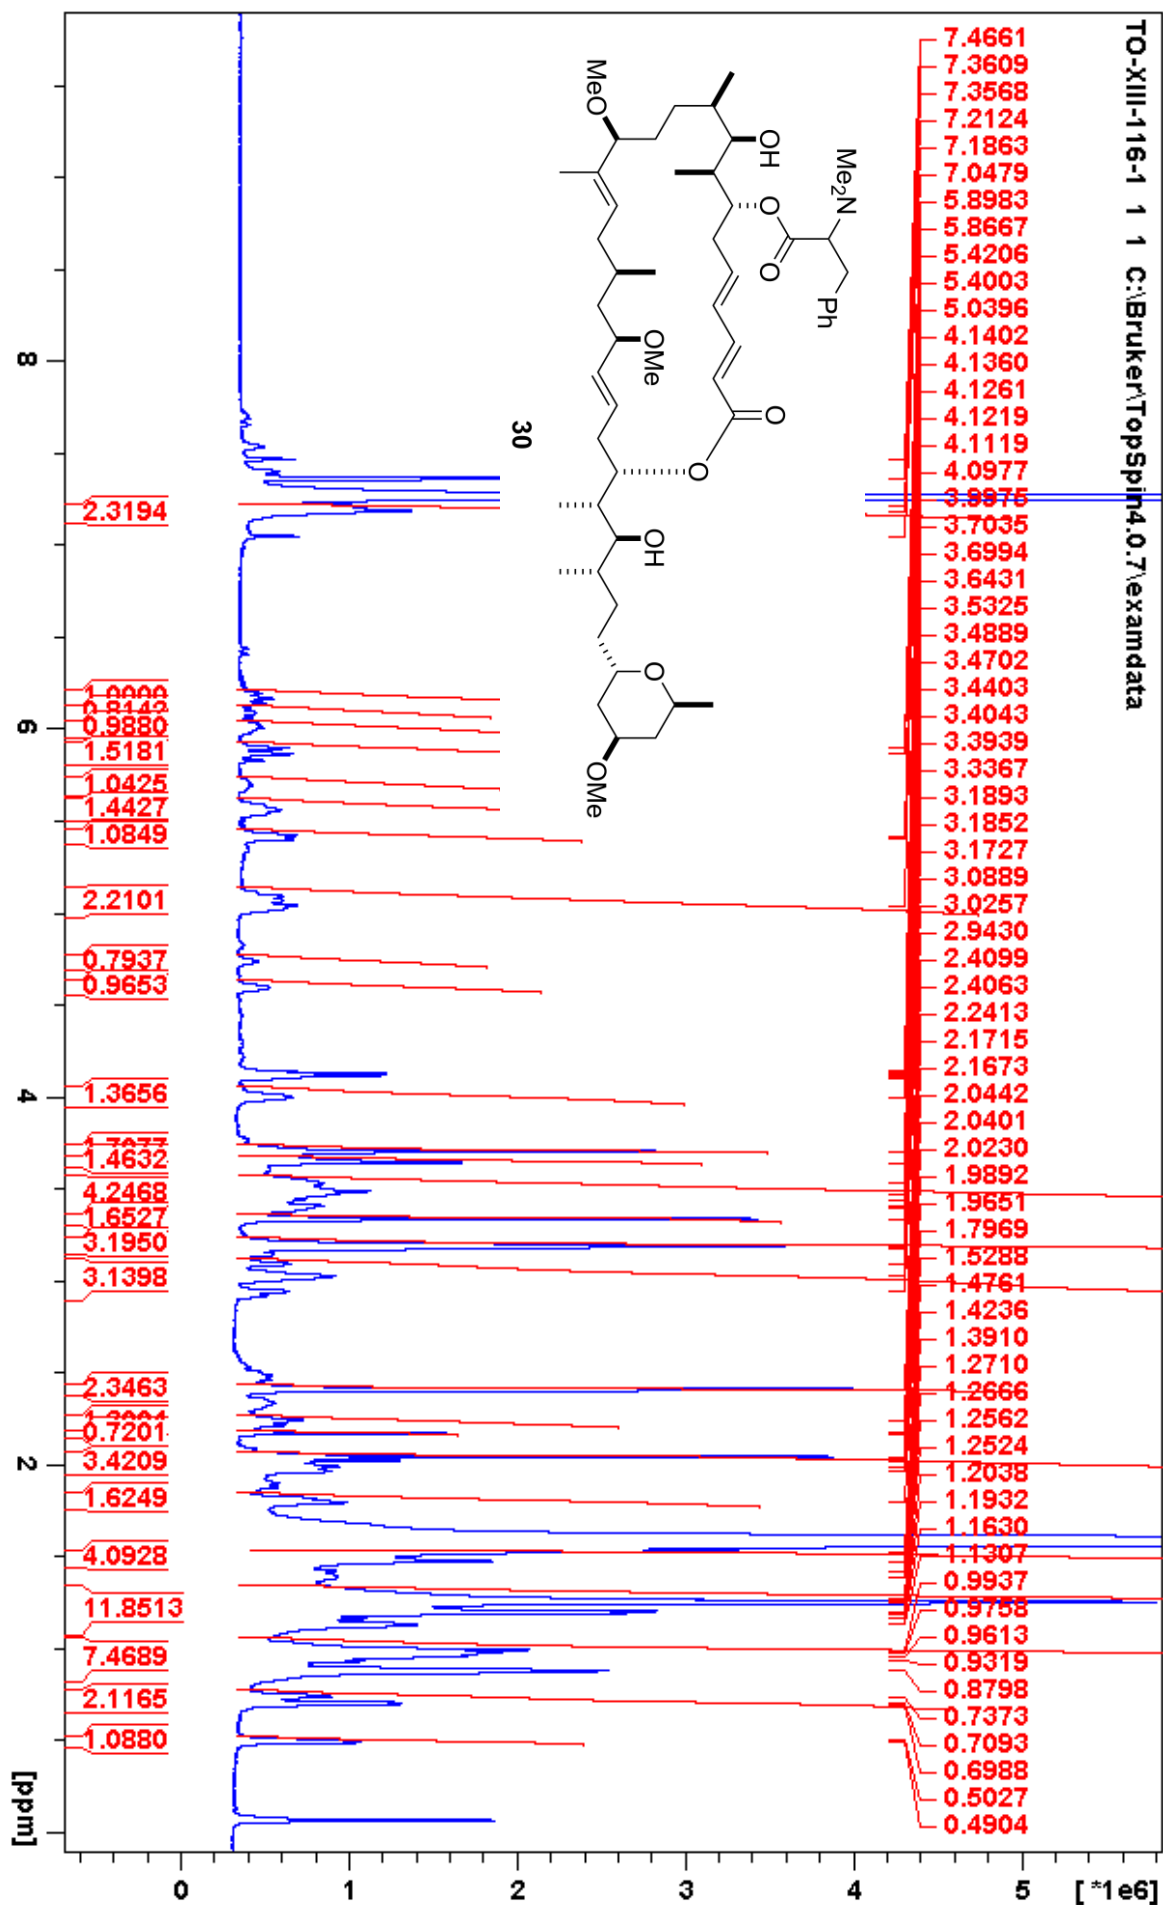

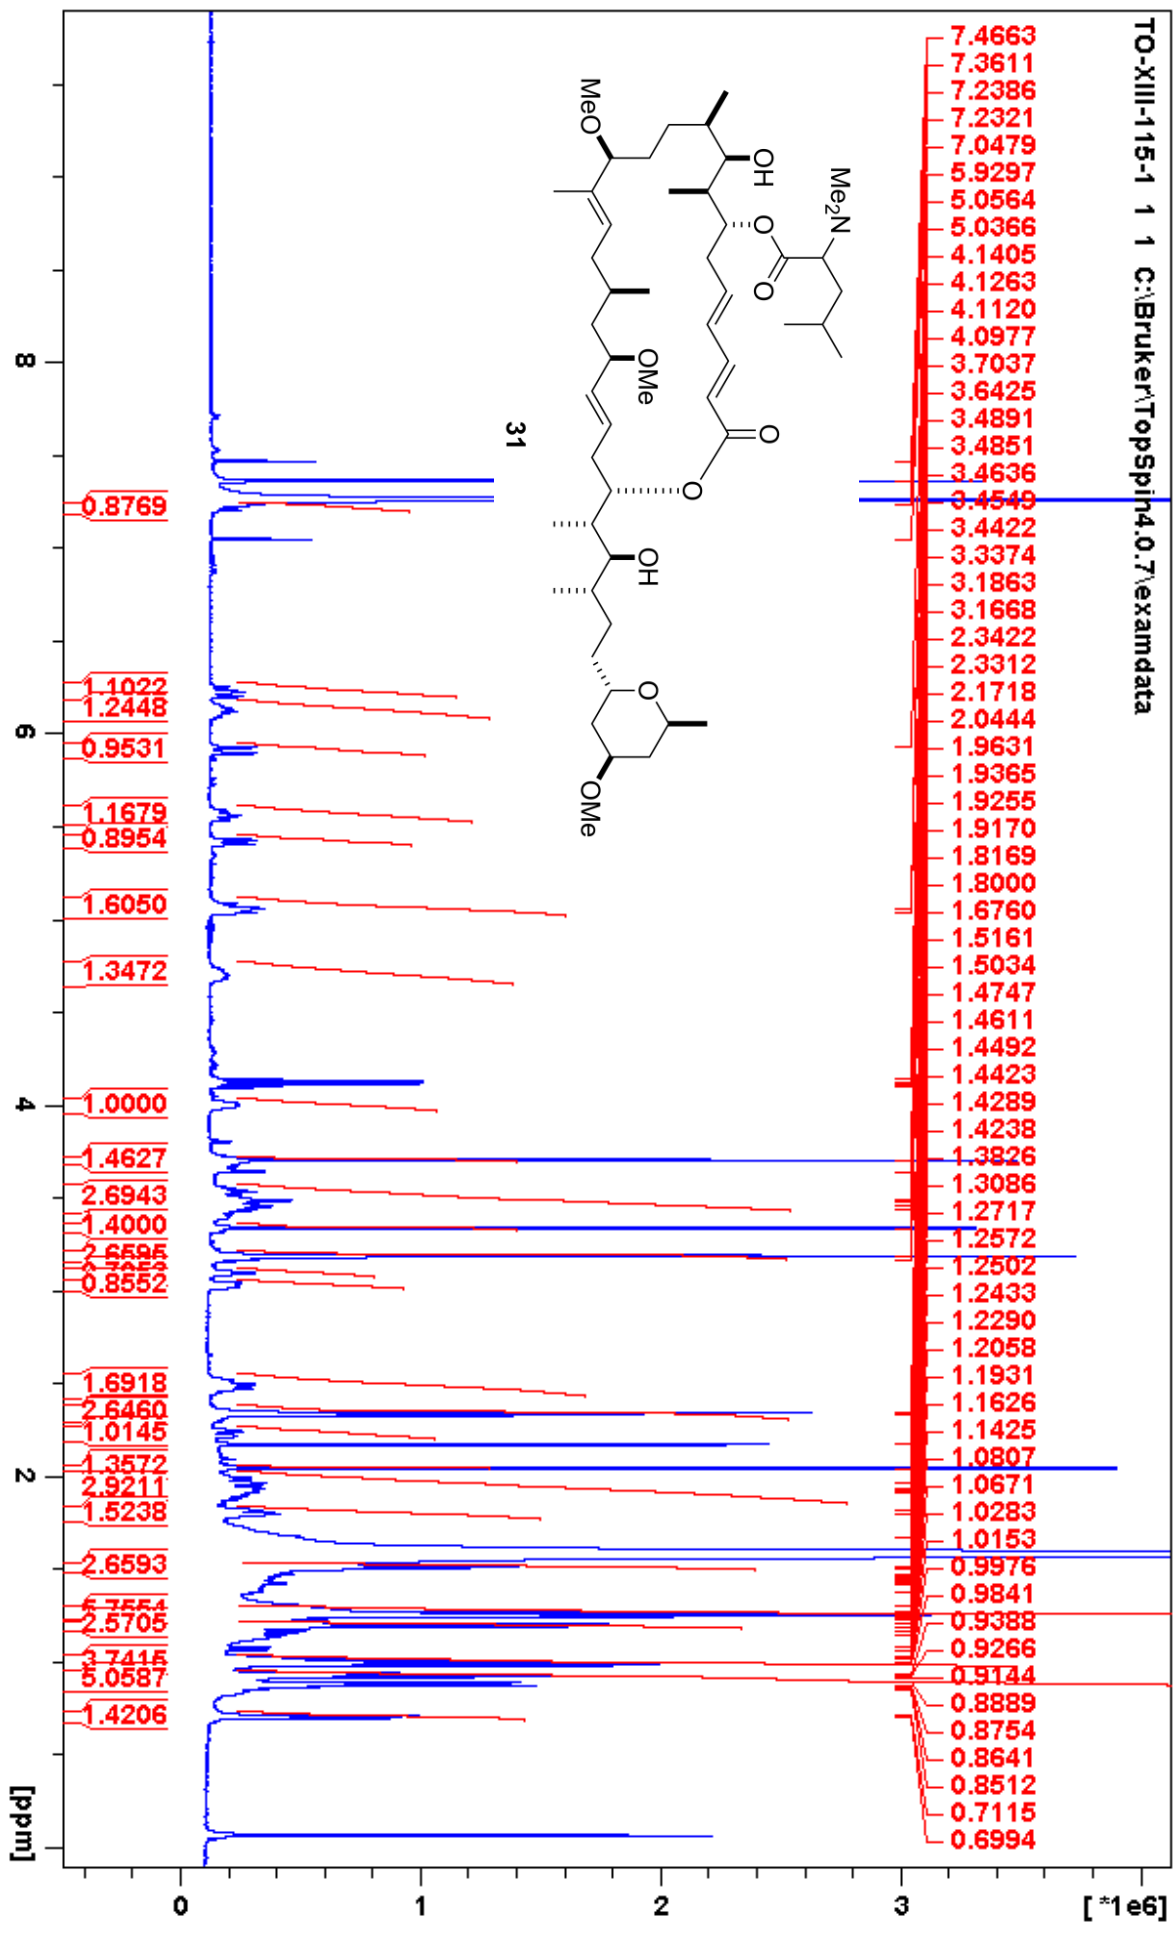

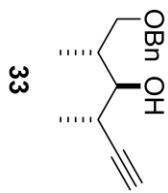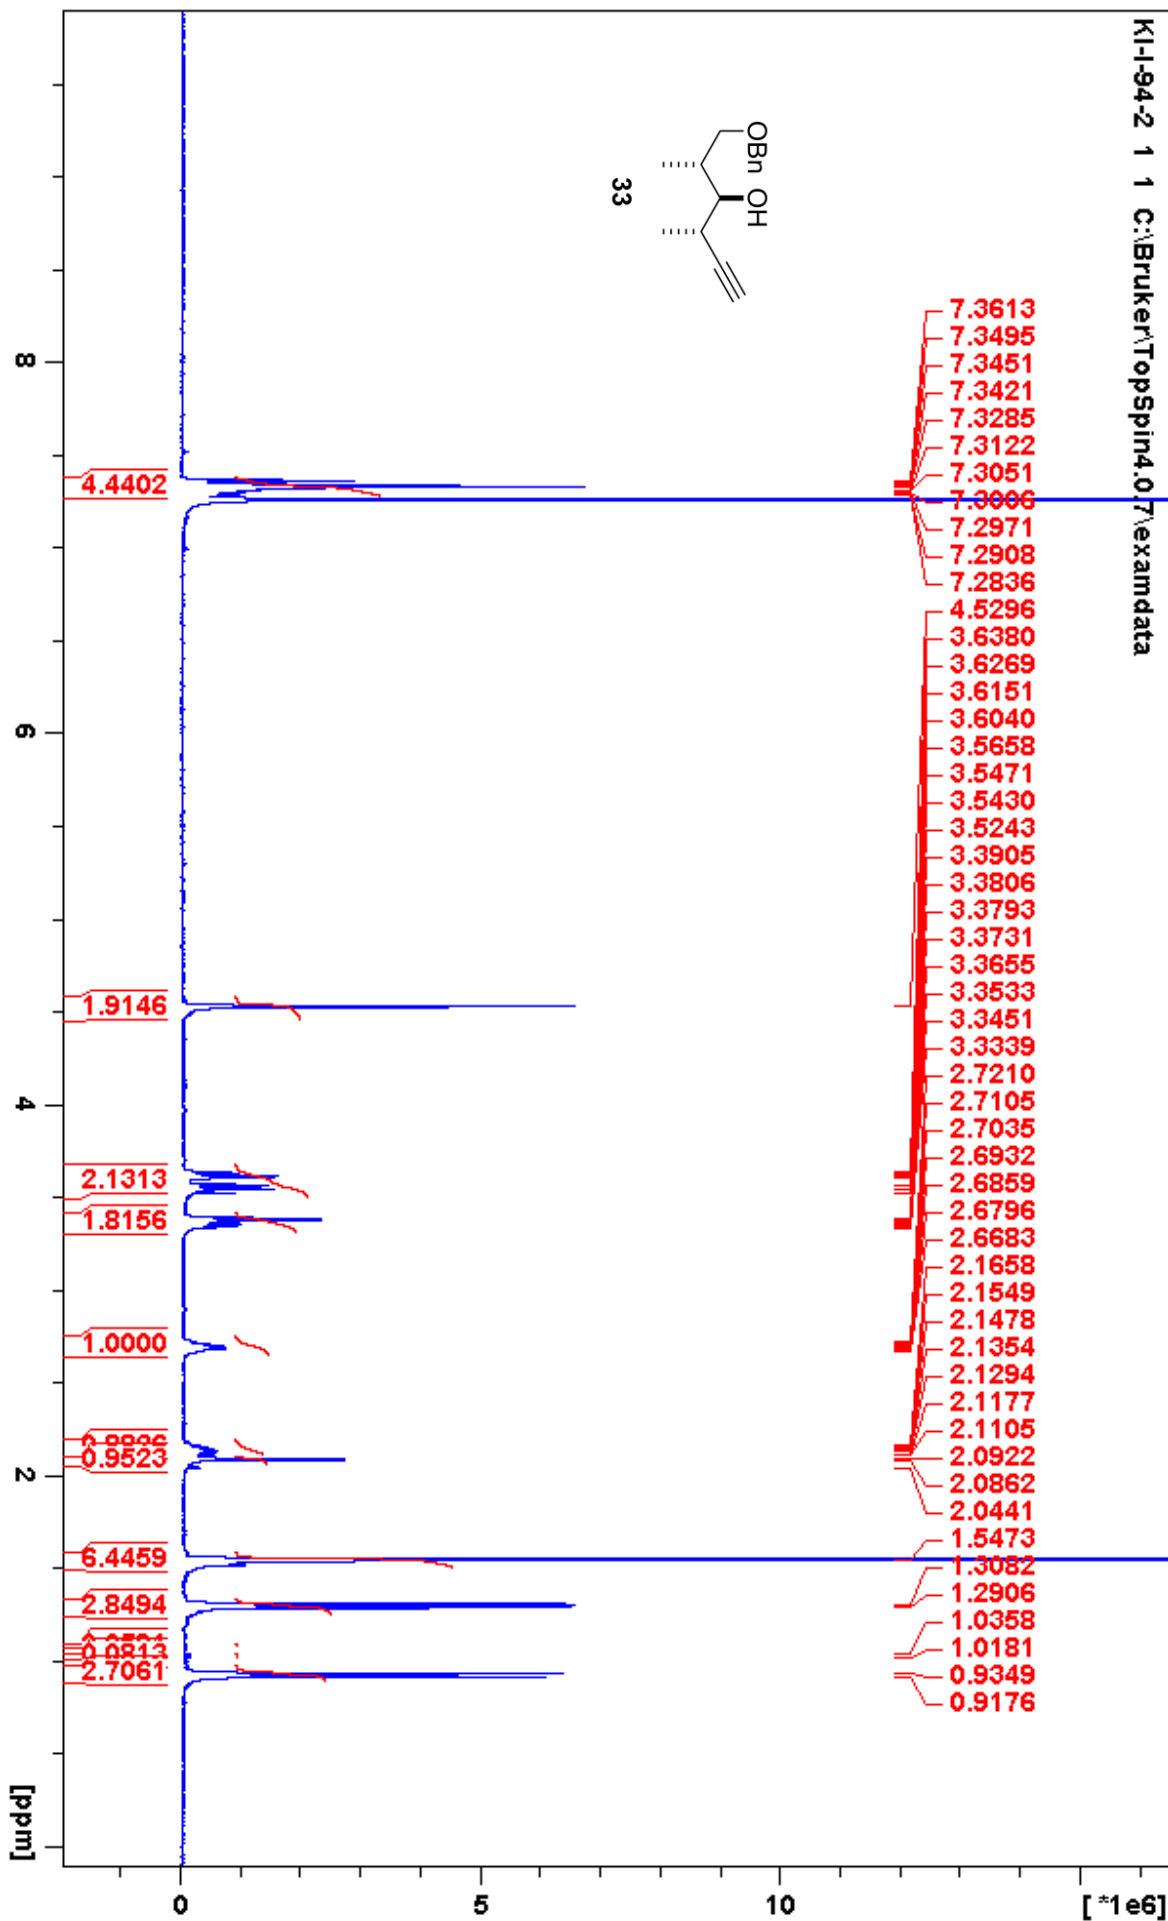

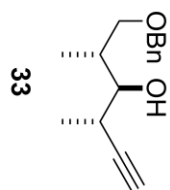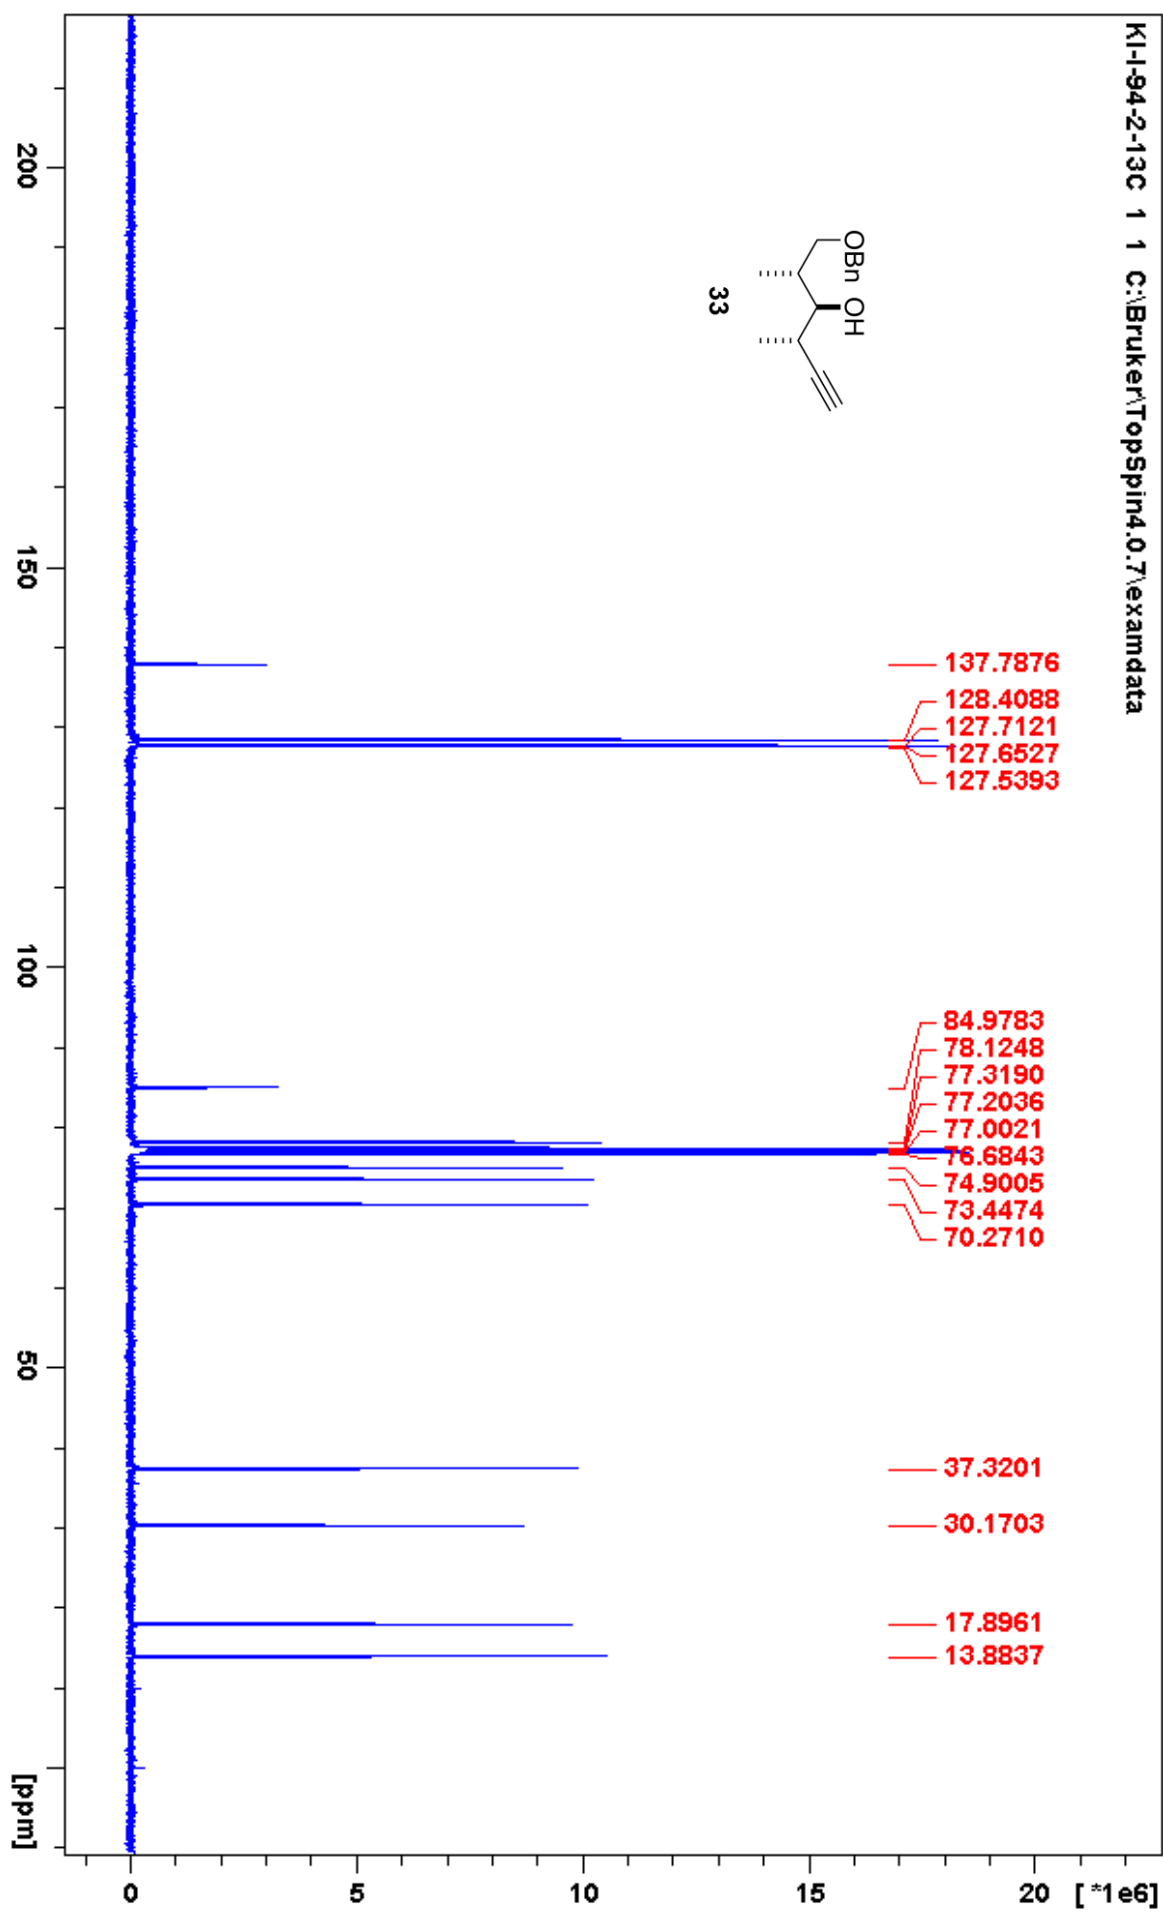



KI-189-1 1 1 C:\Bruker\TopSpin4.07\examdata

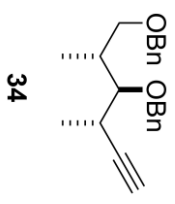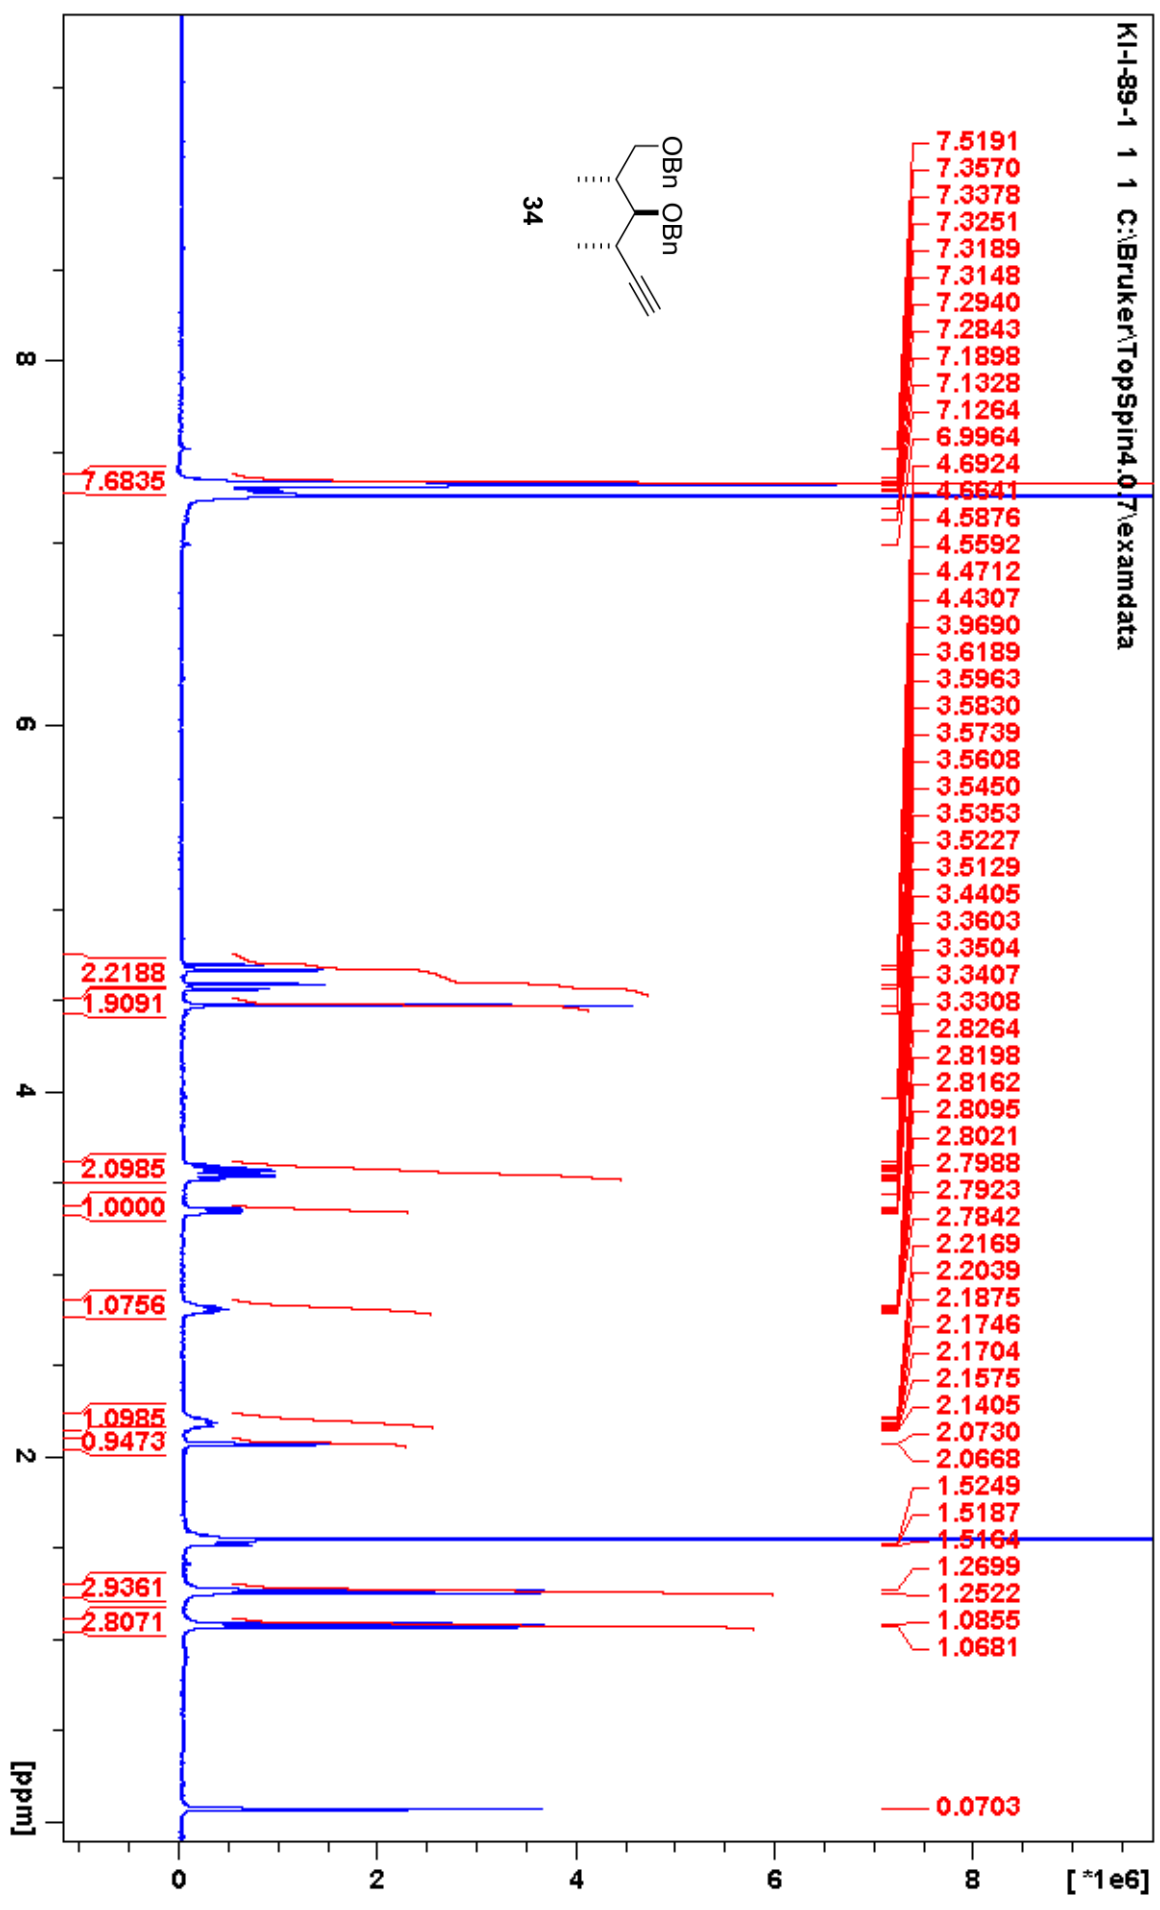

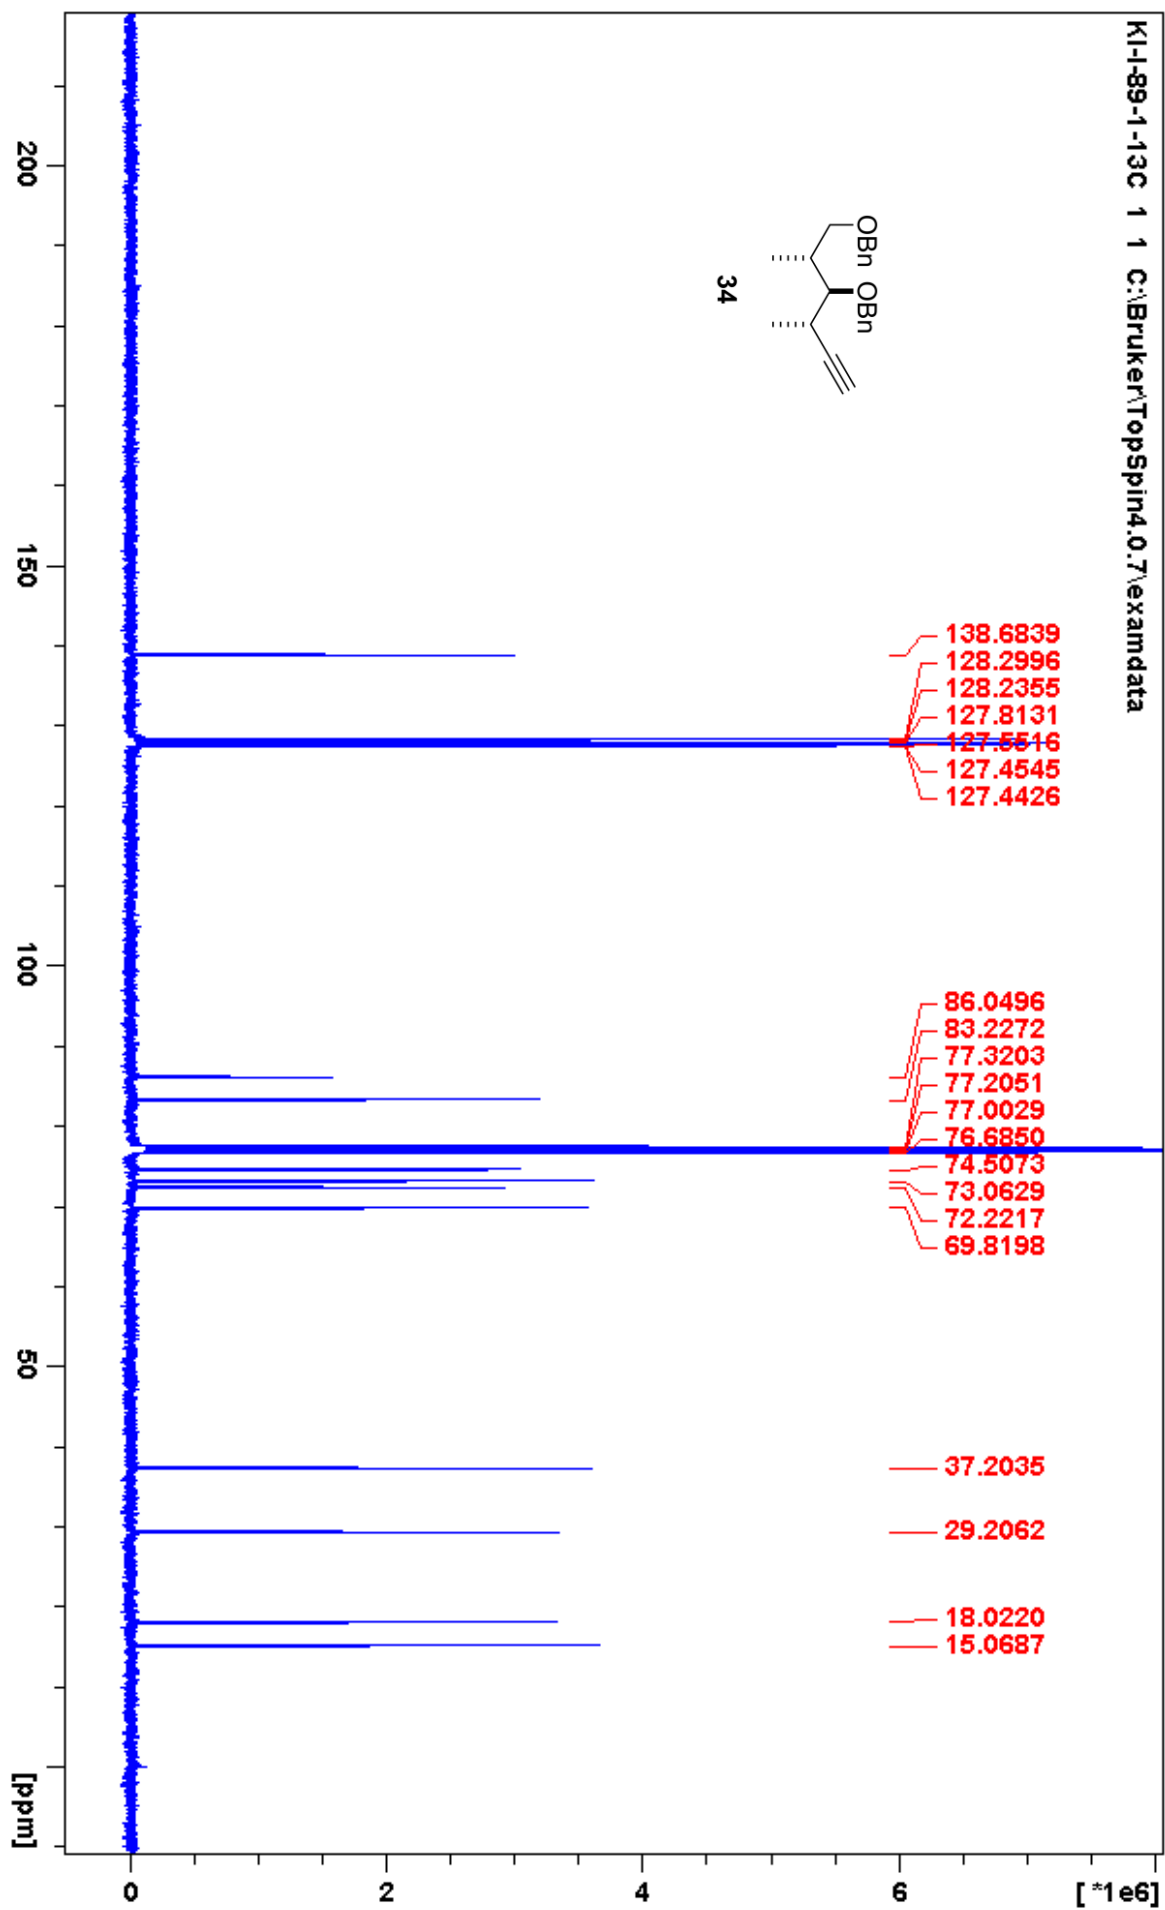

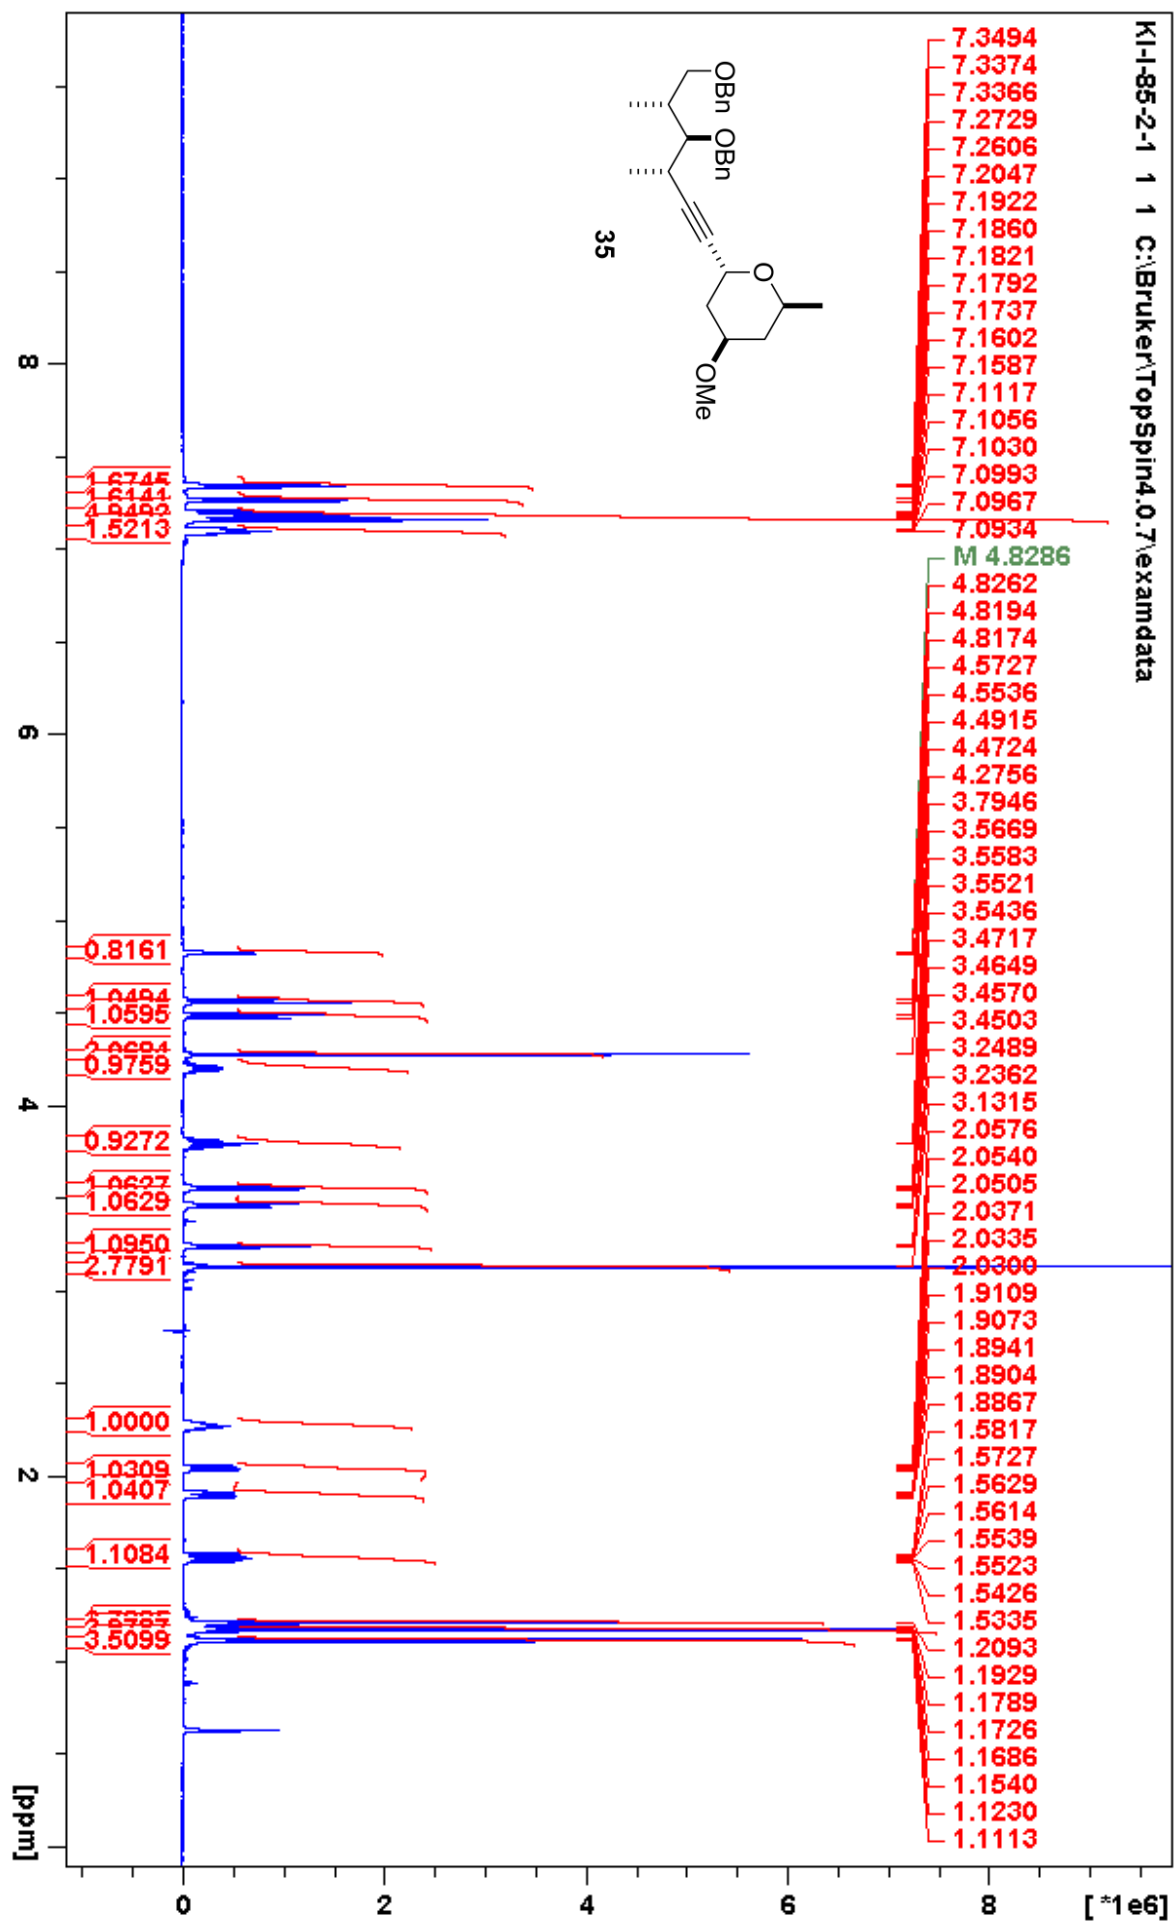

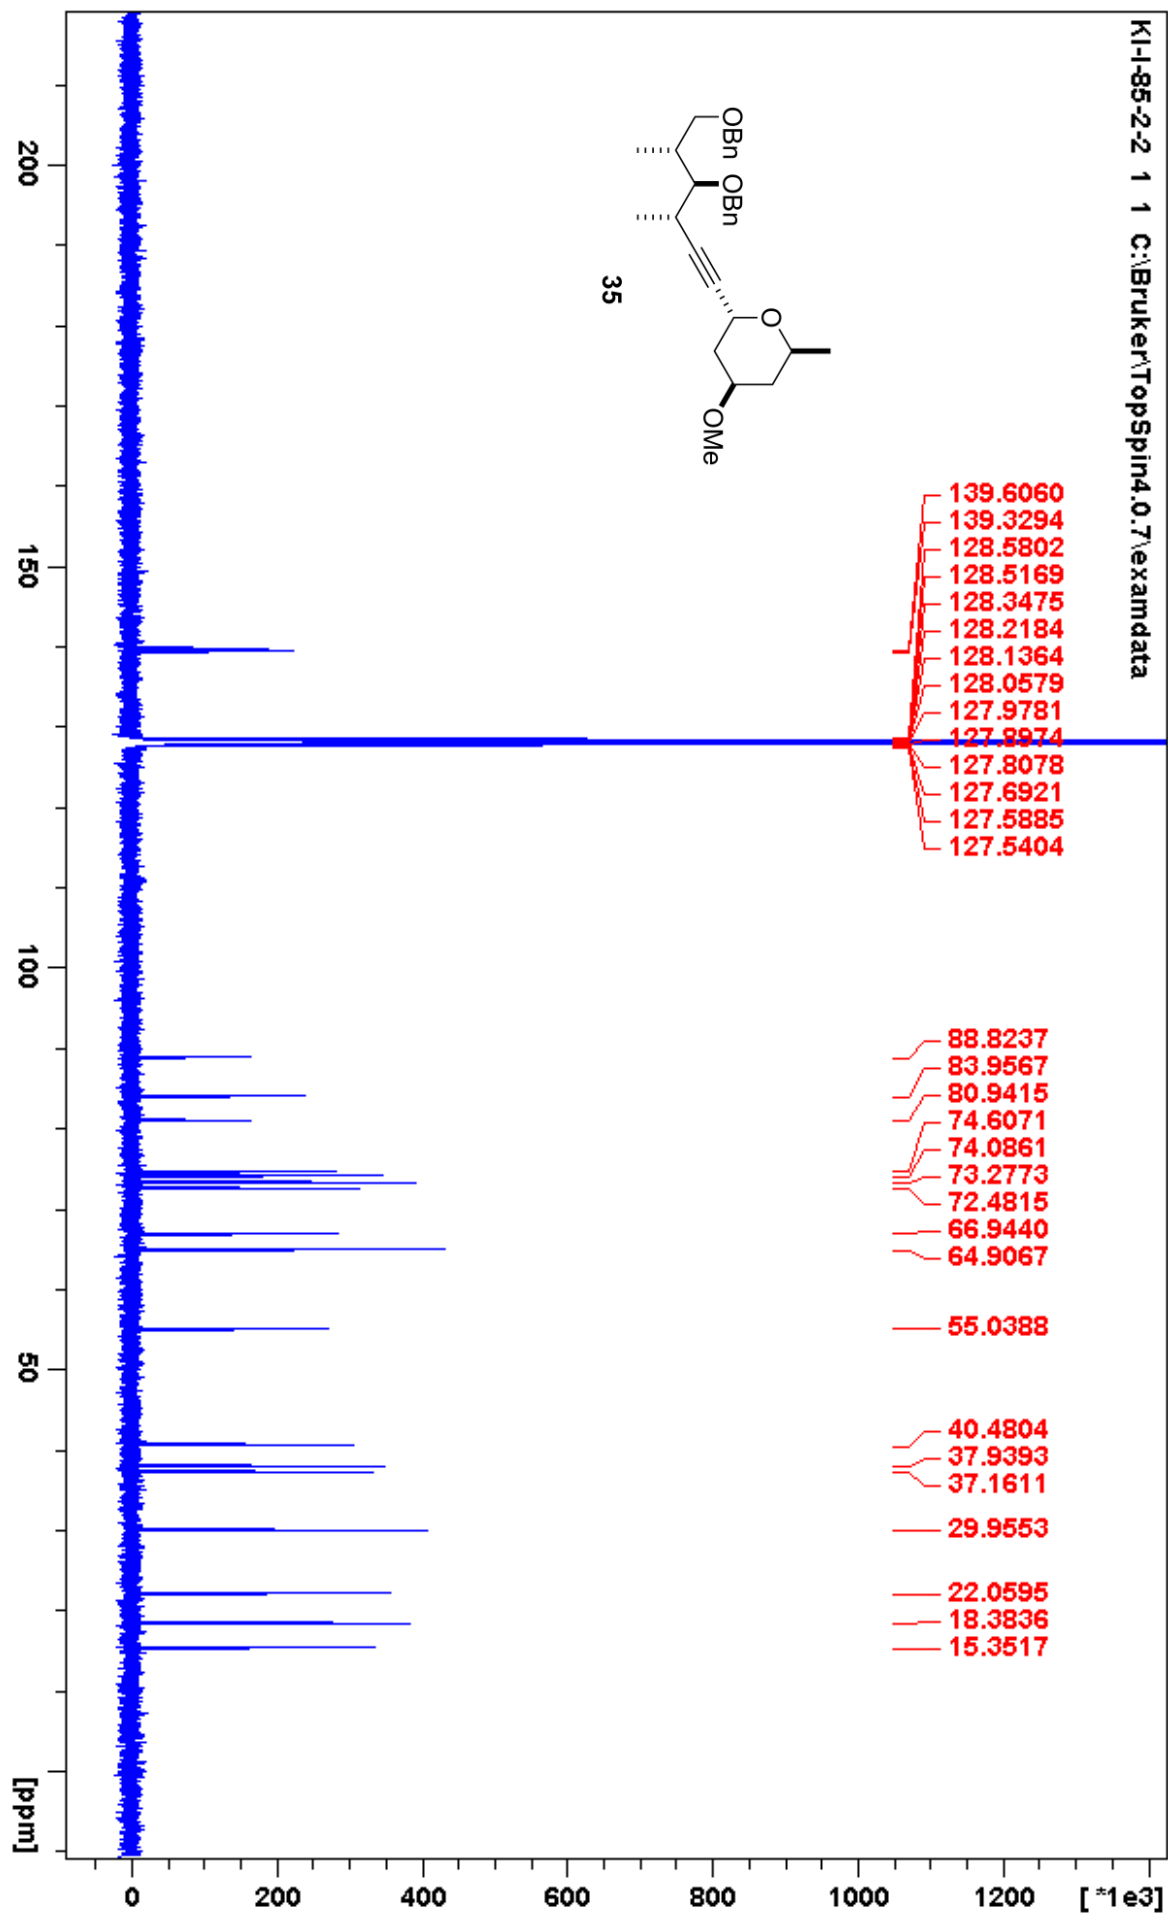

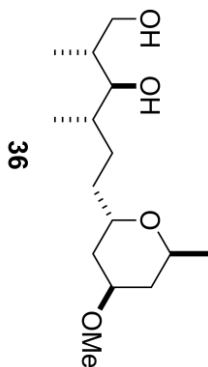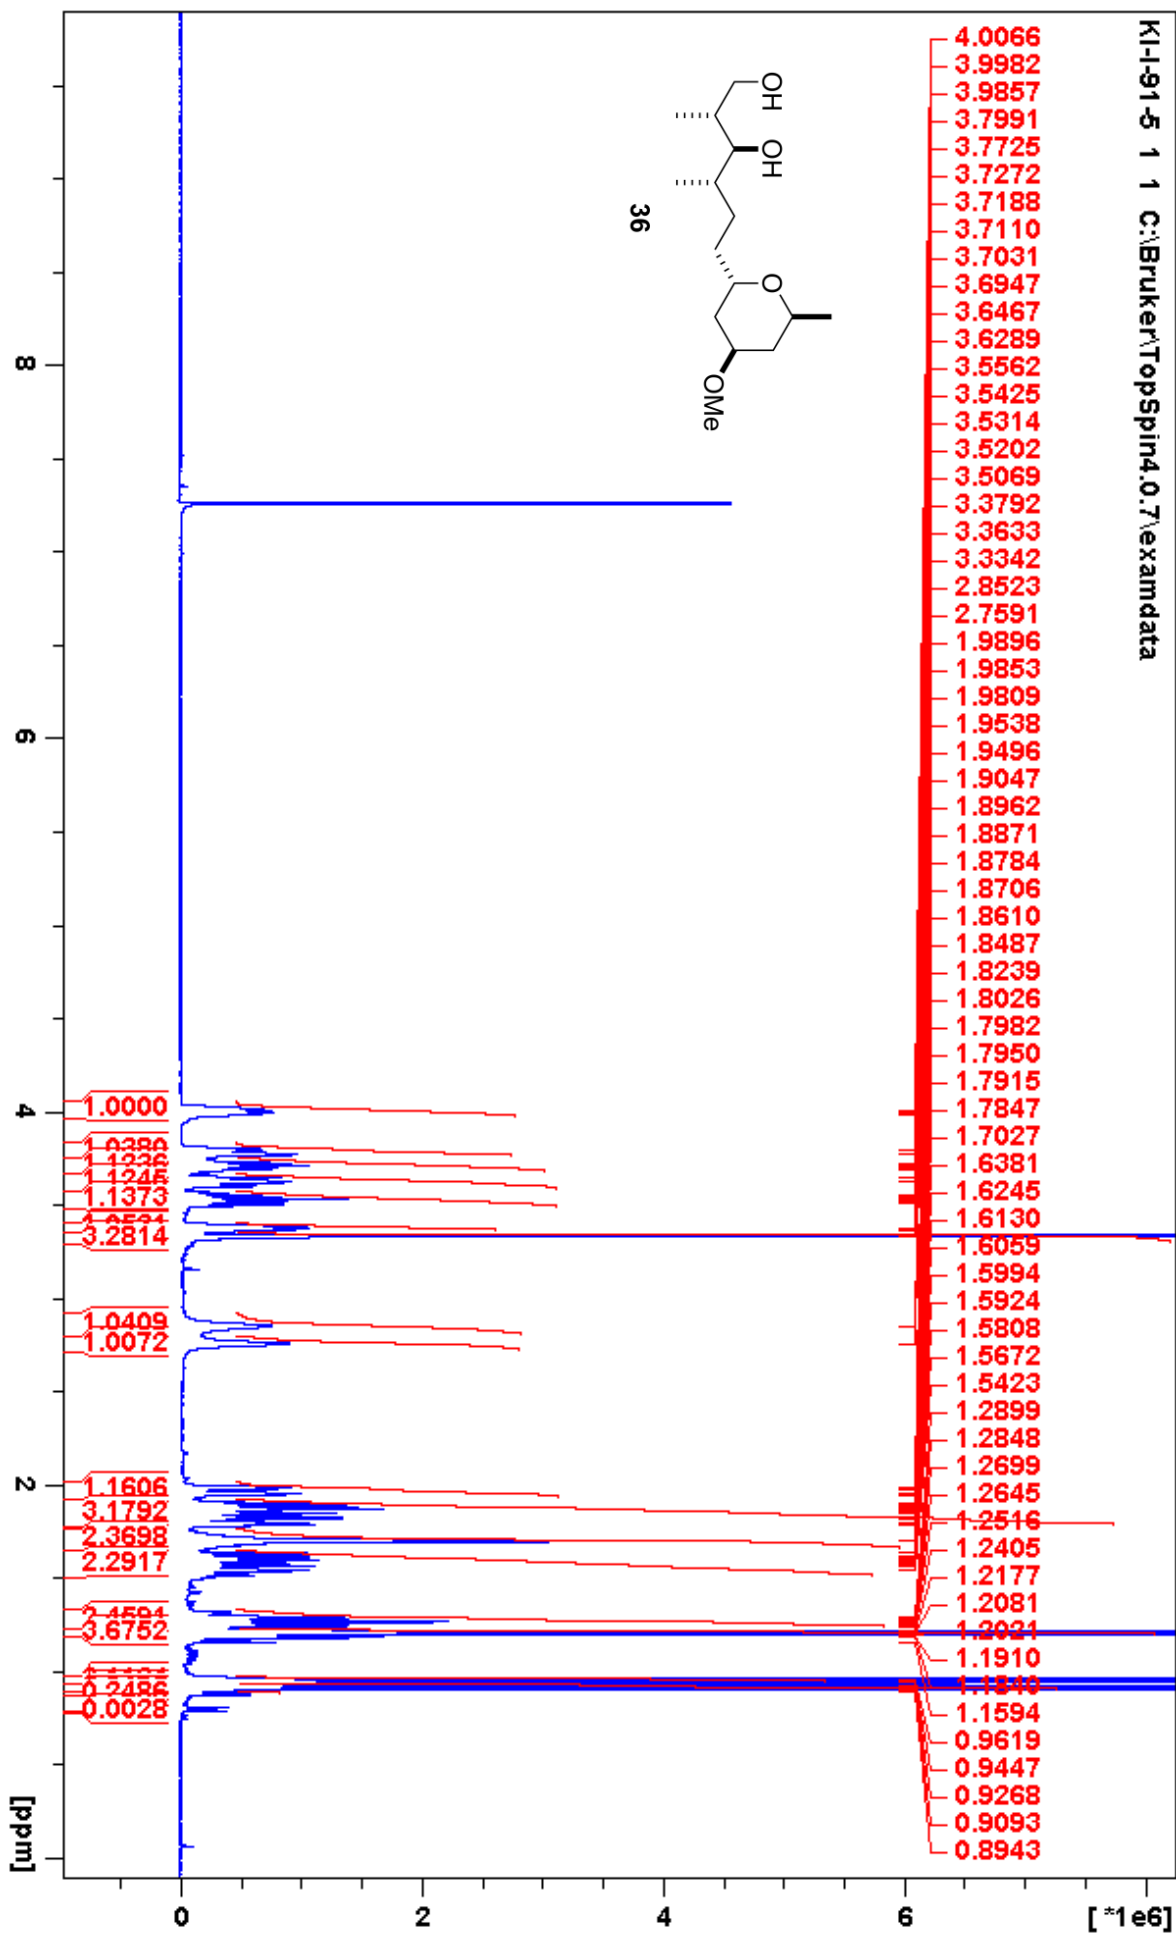

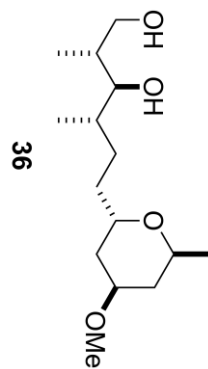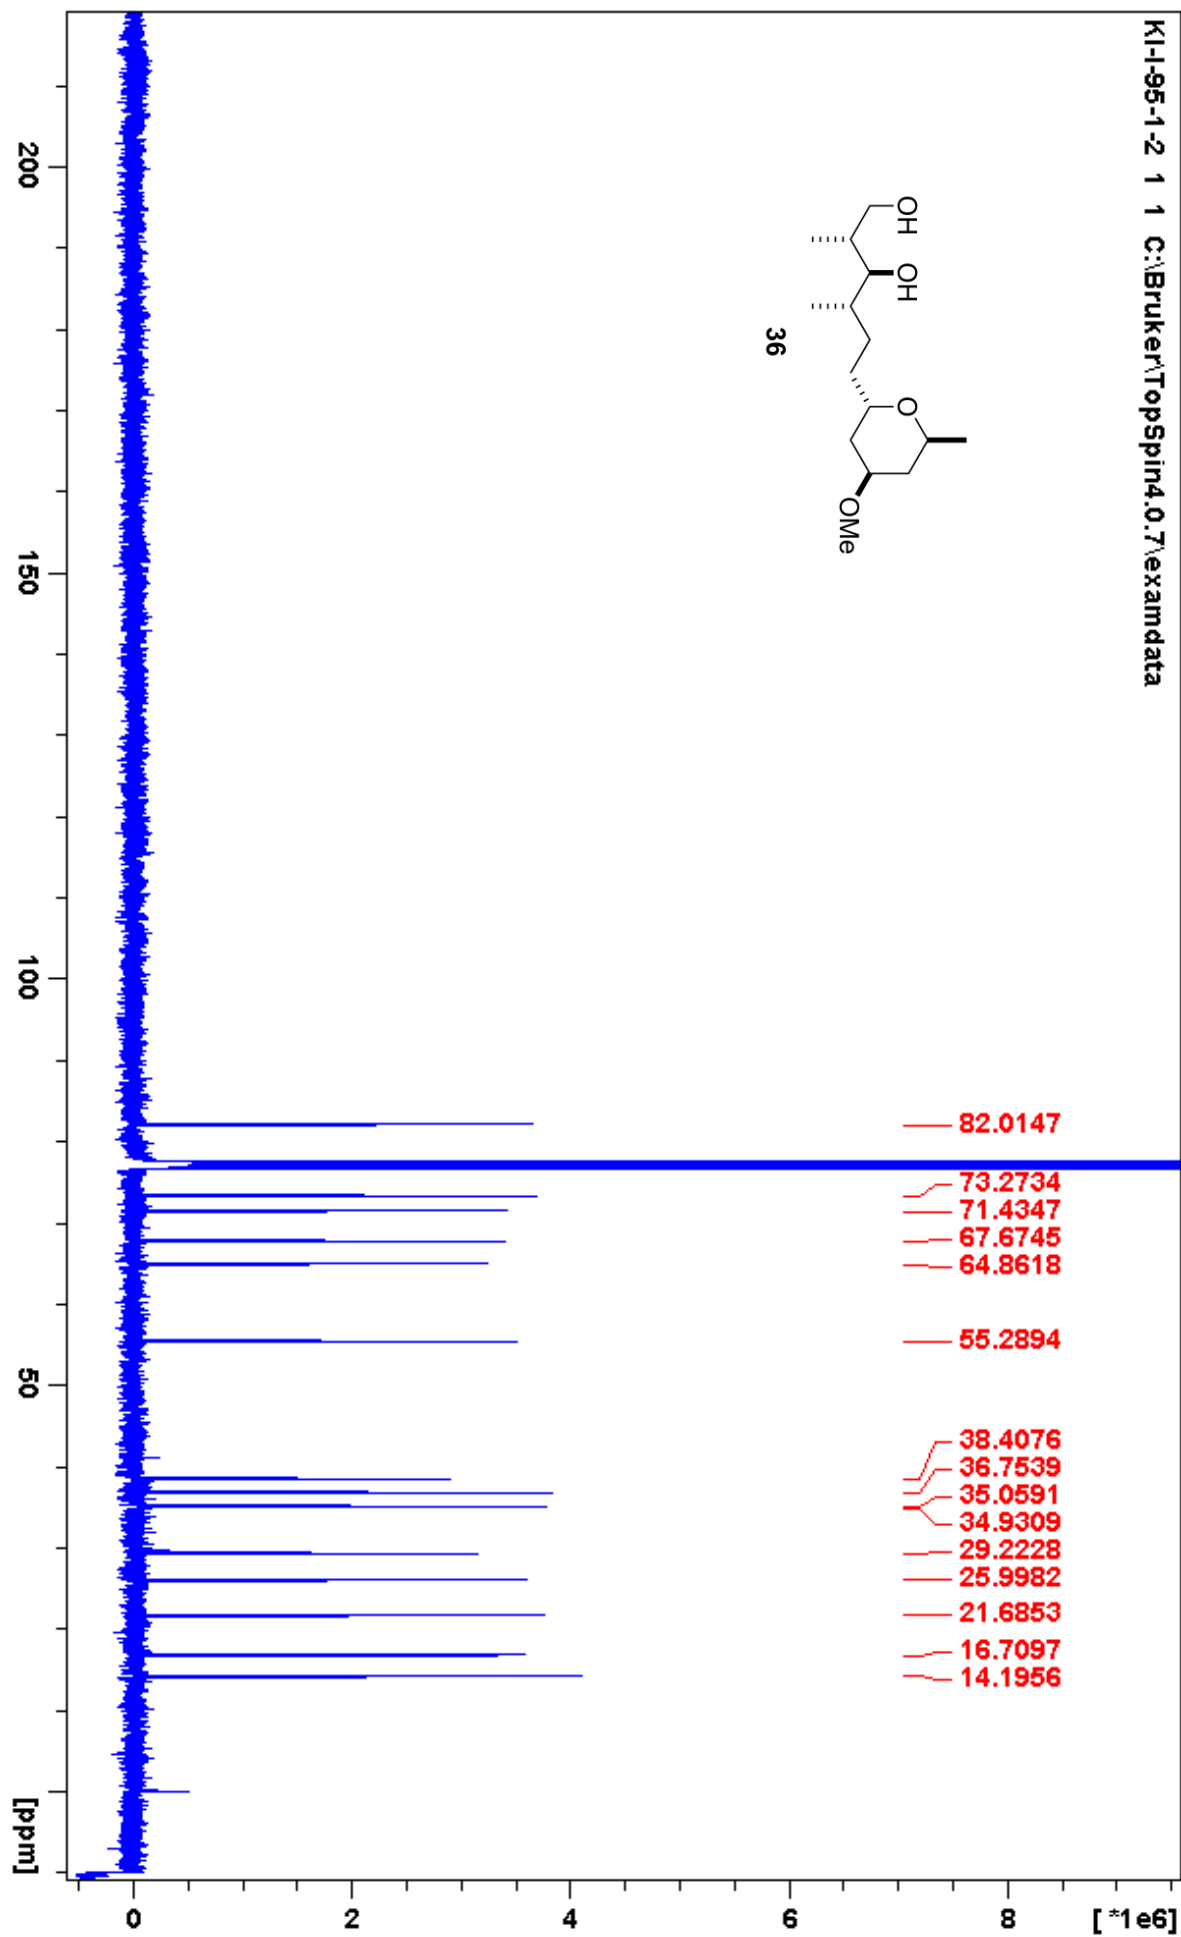

Supplement: d2ob00118g1.pdf [file d2ob00118g1.pdf]
